# Supplementary material
Source: PubMed Central journal article supplement (PMC9724863)
Supplement: EIJ-D-20-01018_Secemsky_SD.pdf [file EIJ-D-20-01018_Secemsky_SD.pdf]

## Supplementary data

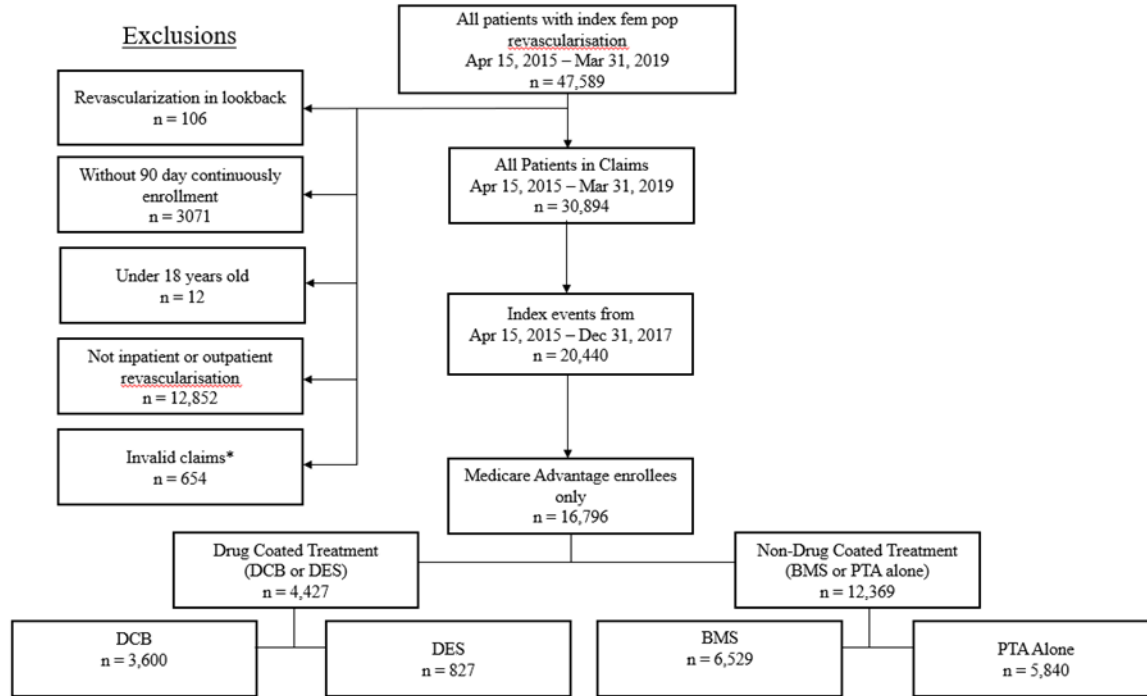

\*Invalid claims include claims with dates of service occurring after date of death, claims with zero or negative payments, end of continuous enrollment prior to index date, etc.

Supplementary Figure 1. Patient flow diagram.

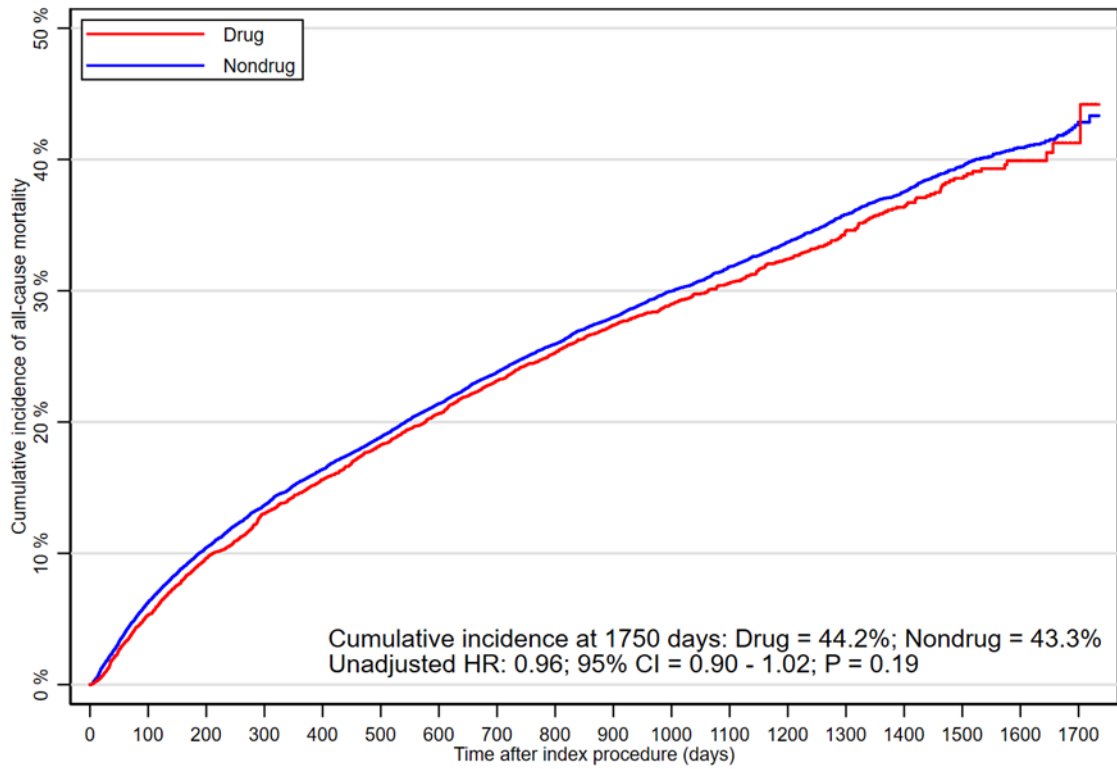

No. at risk:

|         |        |        |        |        |       |       |       |       |       |       |       |     |
|---------|--------|--------|--------|--------|-------|-------|-------|-------|-------|-------|-------|-----|
| Drug    | 4,427  | 4,093  | 3,851  | 3,683  | 3,513 | 3,255 | 2,497 | 1,897 | 1,274 | 704   | 365   | 89  |
| Nondrug | 12,367 | 11,319 | 10,680 | 10,189 | 9,721 | 9,113 | 7,156 | 5,356 | 4,050 | 2,655 | 1,651 | 629 |

**Supplementary Figure 2.** Unadjusted cumulative incidence of mortality curves of patients treated with drug-coated and non-drug-coated devices.

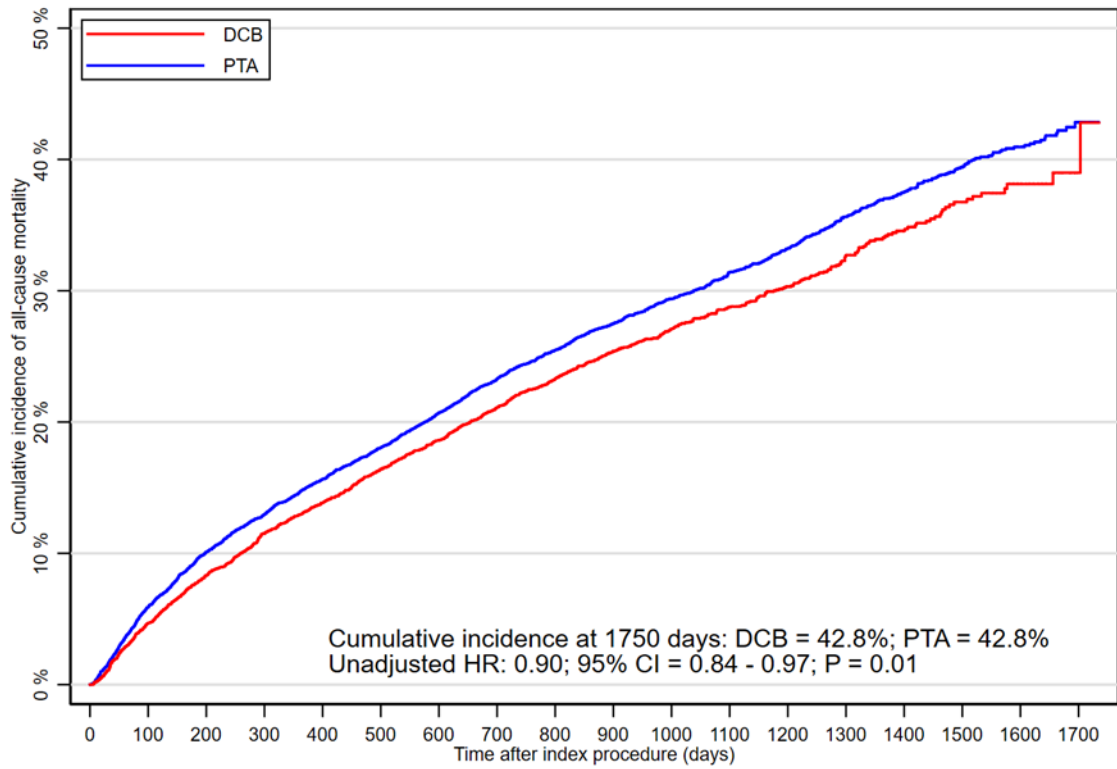

No. at risk:

|     |       |       |       |       |       |       |       |       |       |       |     |     |
|-----|-------|-------|-------|-------|-------|-------|-------|-------|-------|-------|-----|-----|
| DCB | 3,600 | 3,365 | 3,186 | 3,061 | 2,930 | 2,716 | 2,104 | 1,620 | 1,076 | 589   | 312 | 77  |
| PTA | 5,838 | 5,371 | 5,082 | 4,856 | 4,630 | 4,341 | 3,373 | 2,473 | 1,890 | 1,261 | 809 | 331 |

**Supplementary Figure 3.** Unadjusted cumulative incidence of mortality curves of patients treated with drug-coated and non-drug-coated balloons.

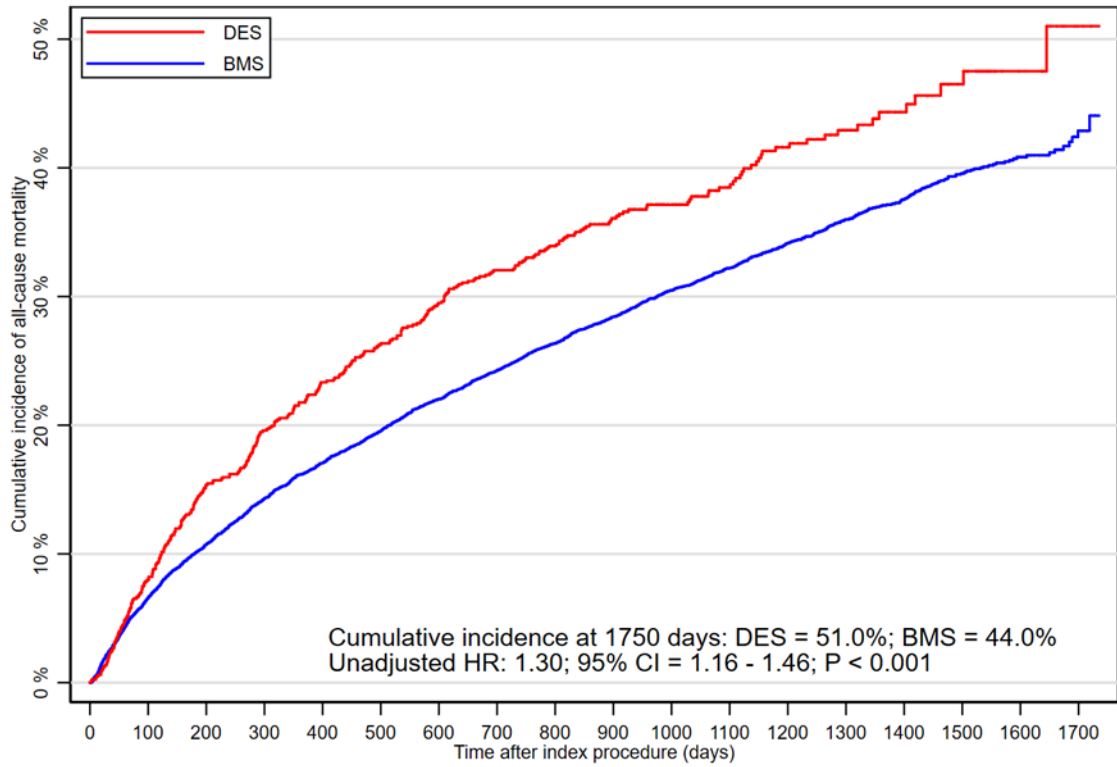

No. at risk:

|     |       |       |       |       |       |       |       |       |       |       |     |     |
|-----|-------|-------|-------|-------|-------|-------|-------|-------|-------|-------|-----|-----|
| DES | 827   | 728   | 665   | 622   | 583   | 539   | 393   | 277   | 198   | 115   | 53  | 12  |
| BMS | 6,529 | 5,948 | 5,598 | 5,333 | 5,091 | 4,772 | 3,783 | 2,883 | 2,160 | 1,394 | 842 | 298 |

**Supplementary Figure 4.** Unadjusted cumulative incidence of mortality curves of patients treated with drug-eluting stents and bare metal stents.

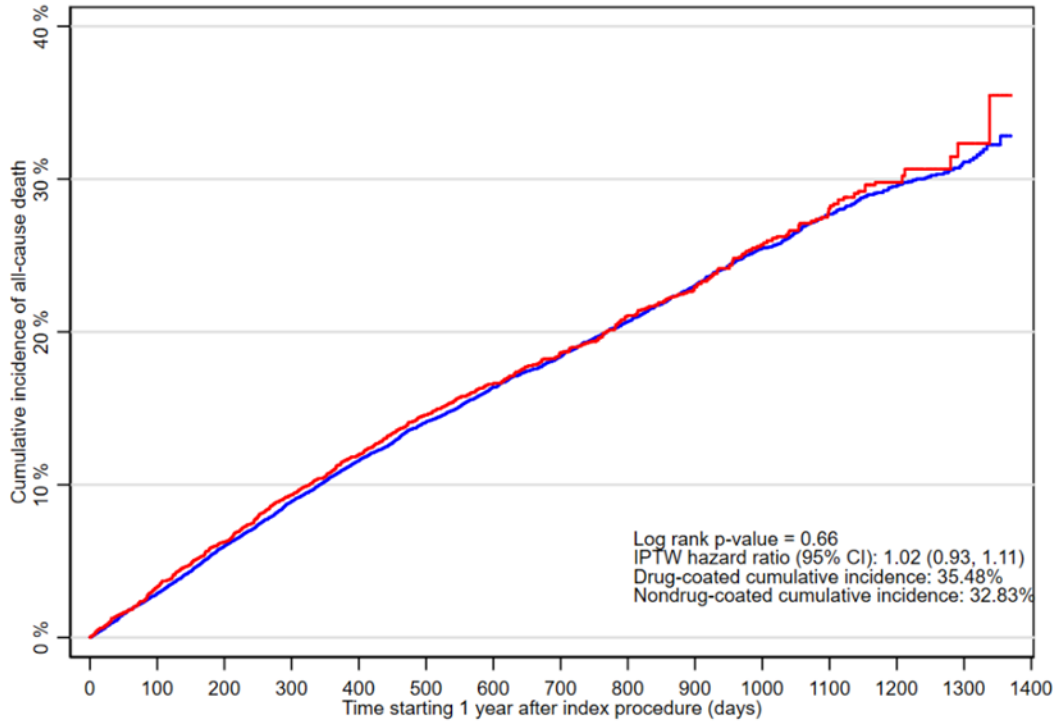

IPTW number at risk:

|                |        |        |       |       |       |       |       |       |       |       |       |       |       |     |
|----------------|--------|--------|-------|-------|-------|-------|-------|-------|-------|-------|-------|-------|-------|-----|
| Drug-coated    | 3,706  | 3,585  | 3,475 | 3,361 | 3,070 | 2,546 | 2,189 | 1,747 | 1,348 | 997   | 598   | 385   | 196   | 59  |
| Nondrug-coated | 10,462 | 10,161 | 9,839 | 9,533 | 8,935 | 7,674 | 6,234 | 5,201 | 4,340 | 3,415 | 2,508 | 1,841 | 1,196 | 527 |

**Supplementary Figure 5.** Adjusted cumulative incidence of mortality curves of patients treated with drug-coated and non-drug-coated devices in the one-year landmark analysis.

**Supplementary Table 1. Codes of femoropopliteal artery revascularisation.**

|                                                              | <b>ICD-10-PCS</b>                                                                                                                                                                                                                                                                                                                                       | <b>CPT</b>                                  |
|--------------------------------------------------------------|---------------------------------------------------------------------------------------------------------------------------------------------------------------------------------------------------------------------------------------------------------------------------------------------------------------------------------------------------------|---------------------------------------------|
| Drug-coated balloon                                          | 047K3Z1, 047L3Z1, 047M3Z1, 047N3Z1,<br>047K3D1, 047L3D1, 047M3D1, 047N3D1                                                                                                                                                                                                                                                                               | 37224, 37225, 37226,<br>or 37227 with C2623 |
| Uncoated percutaneous<br>transluminal angioplasty<br>balloon | 047K3Z6, 047K3ZZ, 047L3ZZ, 047L3Z6, 047M3Z6,<br>047M3ZZ, 047N3Z6, 047N3ZZ                                                                                                                                                                                                                                                                               | 37224 or 37225                              |
| Drug-eluting stent                                           | 047K341, 047L341, 047M341, 047N341,<br>047K346, 047K34Z, 047K356, 047K35Z, 047K366,<br>047K36Z, 047K376, 047K37Z, 047L346, 047L34Z,<br>047L356, 047L35Z, 047L366, 047L36Z, 047L376,<br>047L37Z, 047M346, 047M34Z, 047M356, 047M35Z,<br>047M366, 047M36Z, 047M376, 047M37Z, 047N346,<br>047N34Z, 047N356, 047N35Z, 047N366, 047N36Z,<br>047N376, 047N37Z | 37226 or 37227 with<br>C1874 or C1875       |
| Bare metal stent                                             | 047K3D6, 047K3DZ, 047K3E6, 047K3EZ, 047K3F6,<br>047K3FZ, 047K3G6, 047K3GZ, 047L3D6, 047L3DZ,<br>047L3E6, 047L3EZ, 047L3F6, 047L3FZ, 047L3G6,<br>047L3GZ, 047M3D6, 047M3DZ, 047M3E6, 047M3EZ,<br>047M3F6, 047M3FZ, 047M3G6, 047M3GZ, 047N3D6,<br>047N3DZ, 047N3E6, 047N3EZ, 047N3F6, 047N3FZ,<br>047N3G6, 047N3GZ                                        | 37226 or 37227                              |
| Atherectomy                                                  | 04CK3ZZ, 04CL3ZZ, 04CM3ZZ, 04CN3ZZ                                                                                                                                                                                                                                                                                                                      |                                             |

**Supplementary Table 2. Elixhauser comorbidity diagnosis codes.**

|               | ICD-9                                                                                                                                                                                                                                                                                                                                                                                                                                                                                                                                                                                                                                                | ICD-10                                                                                                                                                                                                                                                                                                                                                                                                                                                                                                                                                                                                                                                                                                                                                                                                                                                                                                                                                                                                                                                                                                                                                                                                                                                            |
|---------------|------------------------------------------------------------------------------------------------------------------------------------------------------------------------------------------------------------------------------------------------------------------------------------------------------------------------------------------------------------------------------------------------------------------------------------------------------------------------------------------------------------------------------------------------------------------------------------------------------------------------------------------------------|-------------------------------------------------------------------------------------------------------------------------------------------------------------------------------------------------------------------------------------------------------------------------------------------------------------------------------------------------------------------------------------------------------------------------------------------------------------------------------------------------------------------------------------------------------------------------------------------------------------------------------------------------------------------------------------------------------------------------------------------------------------------------------------------------------------------------------------------------------------------------------------------------------------------------------------------------------------------------------------------------------------------------------------------------------------------------------------------------------------------------------------------------------------------------------------------------------------------------------------------------------------------|
| AIDS/HIV      | 42                                                                                                                                                                                                                                                                                                                                                                                                                                                                                                                                                                                                                                                   | B20                                                                                                                                                                                                                                                                                                                                                                                                                                                                                                                                                                                                                                                                                                                                                                                                                                                                                                                                                                                                                                                                                                                                                                                                                                                               |
| Alcohol abuse | 265.2, 291.1, 291.2, 291.3, 291.5, 291.81, 291.82, 291.89, 291.9, 303, 303.01, 303.02, 303.03, 303.9, 303.91, 303.92, 303.93, 305, 305.01, 305.02, 305.03, 357.5, 425.5, 535.3, 535.31, 571, 571.1, 571.2, 571.3, 980, 980.1, 980.2, 980.3, 980.8, 980.9, V11.3                                                                                                                                                                                                                                                                                                                                                                                      | E52, F10.10, F10.11, F10.120, F10.121, F10.129, F10.14, F10.150, F10.151, F10.159, F10.180, F10.181, F10.182, F10.188, F10.19, F10.20, F10.21, F10.220, F10.221, F10.229, F10.230, F10.231, F10.232, F10.239, F10.24, F10.250, F10.251, F10.259, F10.26, F10.27, F10.280, F10.281, F10.282, F10.288, F10.29, F10.920, F10.921, F10.929, F10.94, F10.950, F10.951, F10.959, F10.96, F10.97, F10.980, F10.981, F10.982, F10.988, F10.99, G62.1, I42.6, K29.20, K29.21, K70.0, K70.30, K70.31, K70.9, T51.0X1A, T51.0X1D, T51.0X1S, T51.0X2A, T51.0X2D, T51.0X2S, T51.0X3A, T51.0X3D, T51.0X3S, T51.0X4A, T51.0X4D, T51.0X4S, T51.1X1A, T51.1X1D, T51.1X1S, T51.1X2A, T51.1X2D, T51.1X2S, T51.1X3A, T51.1X3D, T51.1X3S, T51.1X4A, T51.1X4D, T51.1X4S, T51.2X1A, T51.2X1D, T51.2X1S, T51.2X2A, T51.2X2D, T51.2X2S, T51.2X3A, T51.2X3D, T51.2X3S, T51.2X4A, T51.2X4D, T51.2X4S, T51.3X1A, T51.3X1D, T51.3X1S, T51.3X2A, T51.3X2D, T51.3X2S, T51.3X3A, T51.3X3D, T51.3X3S, T51.3X4A, T51.3X4D, T51.3X4S, T51.8X1A, T51.8X1D, T51.8X1S, T51.8X2A, T51.8X2D, T51.8X2S, T51.8X3A, T51.8X3D, T51.8X3S, T51.8X4A, T51.8X4D, T51.8X4S, T51.91XA, T51.91XD, T51.91XS, T51.92XA, T51.92XD, T51.92XS, T51.93XA, T51.93XD, T51.93XS, T51.94XA, T51.94XD, T51.94XS, Z71.41, Z71.42 |
| Anaemia       | 280.1, 280.8, 280.9, 281, 281.1, 281.2, 281.3, 281.4, 281.8, 281.9                                                                                                                                                                                                                                                                                                                                                                                                                                                                                                                                                                                   | D50.8, D50.9, D51.0, D51.1, D51.2, D51.3, D51.8, D51.9, D52.0, D52.1, D52.8, D52.9, D53.0, D53.1, D53.2, D53.8, D53.9                                                                                                                                                                                                                                                                                                                                                                                                                                                                                                                                                                                                                                                                                                                                                                                                                                                                                                                                                                                                                                                                                                                                             |
| Cancer        | 200, 200.01, 200.02, 200.03, 200.04, 200.05, 200.06, 200.07, 200.08, 200.1, 200.11, 200.12, 200.13, 200.14, 200.15, 200.16, 200.17, 200.18, 200.2, 200.21, 200.22, 200.23, 200.24, 200.25, 200.26, 200.27, 200.28, 200.3, 200.31, 200.32, 200.33, 200.34, 200.35, 200.36, 200.37, 200.38, 200.4, 200.41, 200.42, 200.43, 200.44, 200.45, 200.46, 200.47, 200.48, 200.5, 200.51, 200.52, 200.53, 200.54, 200.55, 200.56, 200.57, 200.58, 200.6, 200.61, 200.62, 200.63, 200.64, 200.65, 200.66, 200.67, 200.68, 200.7, 200.71, 200.72, 200.73, 200.74, 200.75, 200.76, 200.77, 200.78, 200.8, 200.81, 200.82, 200.83, 200.84, 200.85, 200.86, 200.87, | C81.00, C81.01, C81.02, C81.03, C81.04, C81.05, C81.06, C81.07, C81.08, C81.09, C81.10, C81.11, C81.12, C81.13, C81.14, C81.15, C81.16, C81.17, C81.18, C81.19, C81.20, C81.21, C81.22, C81.23, C81.24, C81.25, C81.26, C81.27, C81.28, C81.29, C81.30, C81.31, C81.32, C81.33, C81.34, C81.35, C81.36, C81.37, C81.38, C81.39, C81.40, C81.41, C81.42, C81.43, C81.44, C81.45, C81.46, C81.47, C81.48, C81.49, C81.70, C81.71, C81.72, C81.73, C81.74, C81.75, C81.76, C81.77, C81.78, C81.79, C81.90, C81.91, C81.92, C81.93, C81.94, C81.95, C81.96, C81.97, C81.98, C81.99, C82.00, C82.01, C82.02, C82.03, C82.04, C82.05, C82.06, C82.07, C82.08, C82.09, C82.10, C82.11, C82.12, C82.13, C82.14, C82.15, C82.16, C82.17, C82.18, C82.19, C82.20, C82.21, C82.22, C82.23, C82.24, C82.25, C82.26, C82.27, C82.28, C82.29, C82.30, C82.31, C82.32, C82.33, C82.34, C82.35, C82.36, C82.37, C82.38, C82.39, C82.40, C82.41, C82.42, C82.43, C82.44, C82.45, C82.46, C82.47, C82.48, C82.49, C82.50, C82.51, C82.52, C82.53, C82.54, C82.55, C82.56, C82.57, C82.58, C82.59, C82.60, C82.61, C82.62, C82.63, C82.64, C82.65, C82.66, C82.67, C82.68, C82.69,                                                                                                   |

|  |                                                                                                                                                                                                                                                                                                                                                                                                                                                                                                                                                                                                                                                                                                                                                                                                                                                                                                                                                                                                                                                                                                                                                                                                                                                                                                                                                                                                                                                                                                                                                                                                                                                            |                                                                                                                                                                                                                                                                                                                                                                                                                                                                                                                                                                                                                                                                                                                                                                                                                                                                                                                                                                                                                                                                                                                                                                                                                                                                                                                                                                                                                                                                                                                                                                                                                                                                                                                                                                                                                                                                                                                                                                                                                                                                                                                                                                                                                                                                                                                                                                                                                                                                                                                                                                                                                                                                                                                                                                                                                                                                                                                                                         |
|--|------------------------------------------------------------------------------------------------------------------------------------------------------------------------------------------------------------------------------------------------------------------------------------------------------------------------------------------------------------------------------------------------------------------------------------------------------------------------------------------------------------------------------------------------------------------------------------------------------------------------------------------------------------------------------------------------------------------------------------------------------------------------------------------------------------------------------------------------------------------------------------------------------------------------------------------------------------------------------------------------------------------------------------------------------------------------------------------------------------------------------------------------------------------------------------------------------------------------------------------------------------------------------------------------------------------------------------------------------------------------------------------------------------------------------------------------------------------------------------------------------------------------------------------------------------------------------------------------------------------------------------------------------------|---------------------------------------------------------------------------------------------------------------------------------------------------------------------------------------------------------------------------------------------------------------------------------------------------------------------------------------------------------------------------------------------------------------------------------------------------------------------------------------------------------------------------------------------------------------------------------------------------------------------------------------------------------------------------------------------------------------------------------------------------------------------------------------------------------------------------------------------------------------------------------------------------------------------------------------------------------------------------------------------------------------------------------------------------------------------------------------------------------------------------------------------------------------------------------------------------------------------------------------------------------------------------------------------------------------------------------------------------------------------------------------------------------------------------------------------------------------------------------------------------------------------------------------------------------------------------------------------------------------------------------------------------------------------------------------------------------------------------------------------------------------------------------------------------------------------------------------------------------------------------------------------------------------------------------------------------------------------------------------------------------------------------------------------------------------------------------------------------------------------------------------------------------------------------------------------------------------------------------------------------------------------------------------------------------------------------------------------------------------------------------------------------------------------------------------------------------------------------------------------------------------------------------------------------------------------------------------------------------------------------------------------------------------------------------------------------------------------------------------------------------------------------------------------------------------------------------------------------------------------------------------------------------------------------------------------------------|
|  | <p>200.88, 201, 201.01, 201.02, 201.03, 201.04, 201.05, 201.06, 201.07, 201.08, 201.1, 201.11, 201.12, 201.13, 201.14, 201.15, 201.16, 201.17, 201.18, 201.2, 201.21, 201.22, 201.23, 201.24, 201.25, 201.26, 201.27, 201.28, 201.4, 201.41, 201.42, 201.43, 201.44, 201.45, 201.46, 201.47, 201.48, 201.5, 201.51, 201.52, 201.53, 201.54, 201.55, 201.56, 201.57, 201.58, 201.6, 201.61, 201.62, 201.63, 201.64, 201.65, 201.66, 201.67, 201.68, 201.7, 201.71, 201.72, 201.73, 201.74, 201.75, 201.76, 201.77, 201.78, 201.9, 201.91, 201.92, 201.93, 201.94, 201.95, 201.96, 201.97, 201.98, 202, 202.01, 202.02, 202.03, 202.04, 202.05, 202.06, 202.07, 202.08, 202.1, 202.11, 202.12, 202.13, 202.14, 202.15, 202.16, 202.17, 202.18, 202.2, 202.21, 202.22, 202.23, 202.24, 202.25, 202.26, 202.27, 202.28, 202.3, 202.31, 202.32, 202.33, 202.34, 202.35, 202.36, 202.37, 202.38, 202.4, 202.41, 202.42, 202.43, 202.44, 202.45, 202.46, 202.47, 202.48, 202.5, 202.51, 202.52, 202.53, 202.54, 202.55, 202.56, 202.57, 202.58, 202.6, 202.61, 202.62, 202.63, 202.64, 202.65, 202.66, 202.67, 202.68, 202.7, 202.71, 202.72, 202.73, 202.74, 202.75, 202.76, 202.77, 202.78, 202.8, 202.81, 202.82, 202.83, 202.84, 202.85, 202.86, 202.87, 202.88, 202.9, 202.91, 202.92, 202.93, 202.94, 202.95, 202.96, 202.97, 202.98, 203, 203.01, 203.02, 238.6, 196, 196.1, 196.2, 196.3, 196.5, 196.6, 196.8, 196.9, 197, 197.1, 197.2, 197.3, 197.4, 197.5, 197.6, 197.7, 197.8, 198, 198.1, 198.2, 198.3, 198.4, 198.5, 198.6, 198.7, 198.81, 198.82, 198.89, 199, 199.1, 199.2, 140, 140.1, 140.3, 140.4, 140.5, 140.6, 140.8, 140.9, 141, 141.1,</p> | <p>C82.80, C82.81, C82.82, C82.83, C82.84, C82.85, C82.86, C82.87, C82.88, C82.89, C82.90, C82.91, C82.92, C82.93, C82.94, C82.95, C82.96, C82.97, C82.98, C82.99, C83.00, C83.01, C83.02, C83.03, C83.04, C83.05, C83.06, C83.07, C83.08, C83.09, C83.10, C83.11, C83.12, C83.13, C83.14, C83.15, C83.16, C83.17, C83.18, C83.19, C83.30, C83.31, C83.32, C83.33, C83.34, C83.35, C83.36, C83.37, C83.38, C83.39, C83.50, C83.51, C83.52, C83.53, C83.54, C83.55, C83.56, C83.57, C83.58, C83.59, C83.70, C83.71, C83.72, C83.73, C83.74, C83.75, C83.76, C83.77, C83.78, C83.79, C83.80, C83.81, C83.82, C83.83, C83.84, C83.85, C83.86, C83.87, C83.88, C83.89, C83.90, C83.91, C83.92, C83.93, C83.94, C83.95, C83.96, C83.97, C83.98, C83.99, C84.00, C84.01, C84.02, C84.03, C84.04, C84.05, C84.06, C84.07, C84.08, C84.09, C84.10, C84.11, C84.12, C84.13, C84.14, C84.15, C84.16, C84.17, C84.18, C84.19, C84.40, C84.41, C84.42, C84.43, C84.44, C84.45, C84.46, C84.47, C84.48, C84.49, C84.60, C84.61, C84.62, C84.63, C84.64, C84.65, C84.66, C84.67, C84.68, C84.69, C84.70, C84.71, C84.72, C84.73, C84.74, C84.75, C84.76, C84.77, C84.78, C84.79, C84.90, C84.91, C84.92, C84.93, C84.94, C84.95, C84.96, C84.97, C84.98, C84.99, C84.A0, C84.A1, C84.A2, C84.A3, C84.A4, C84.A5, C84.A6, C84.A7, C84.A8, C84.A9, C84.Z0, C84.Z1, C84.Z2, C84.Z3, C84.Z4, C84.Z5, C84.Z6, C84.Z7, C84.Z8, C84.Z9, C85.10, C85.11, C85.12, C85.13, C85.14, C85.15, C85.16, C85.17, C85.18, C85.19, C85.20, C85.21, C85.22, C85.23, C85.24, C85.25, C85.26, C85.27, C85.28, C85.29, C85.80, C85.81, C85.82, C85.83, C85.84, C85.85, C85.86, C85.87, C85.88, C85.89, C85.90, C85.91, C85.92, C85.93, C85.94, C85.95, C85.96, C85.97, C85.98, C85.99, C88.0, C88.2, C88.3, C88.4, C88.8, C88.9, C90.00, C90.01, C90.02, C90.20, C90.21, C90.22, C96.0, C96.2, C96.20, C96.21, C96.22, C96.29, C96.4, C96.5, C96.6, C96.9, C96.A, C96.Z, C77.0, C77.1, C77.2, C77.3, C77.4, C77.5, C77.8, C77.9, C78.00, C78.01, C78.02, C78.1, C78.2, C78.30, C78.39, C78.4, C78.5, C78.6, C78.7, C78.80, C78.89, C79.00, C79.01, C79.02, C79.10, C79.11, C79.19, C79.2, C79.31, C79.32, C79.40, C79.49, C79.51, C79.52, C79.60, C79.61, C79.62, C79.70, C79.71, C79.72, C79.81, C79.82, C79.89, C79.9, C7B.00, C7B.01, C7B.02, C7B.03, C7B.04, C7B.09, C7B.1, C7B.8, C80.0, C80.1, C80.2, C00.0, C00.1, C00.2, C00.3, C00.4, C00.5, C00.6, C00.8, C00.9, C01, C02.0, C02.1, C02.2, C02.3, C02.4, C02.8, C02.9, C03.0, C03.1, C03.9, C04.0, C04.1, C04.8, C04.9, C05.0, C05.1, C05.2, C05.8, C05.9, C06.0, C06.1, C06.2, C06.80, C06.89, C06.9, C07, C08.0, C08.1, C08.9, C09.0, C09.1, C09.8, C09.9, C10.0, C10.1, C10.2, C10.3, C10.4, C10.8, C10.9, C11.0, C11.1, C11.2, C11.3, C11.8, C11.9, C12, C13.0, C13.1, C13.2, C13.8, C13.9, C14.0, C14.2, C14.8, C15.3, C15.4, C15.5, C15.8, C15.9, C16.0, C16.1, C16.2, C16.3, C16.4, C16.5, C16.6, C16.8, C16.9, C17.0,</p> |
|--|------------------------------------------------------------------------------------------------------------------------------------------------------------------------------------------------------------------------------------------------------------------------------------------------------------------------------------------------------------------------------------------------------------------------------------------------------------------------------------------------------------------------------------------------------------------------------------------------------------------------------------------------------------------------------------------------------------------------------------------------------------------------------------------------------------------------------------------------------------------------------------------------------------------------------------------------------------------------------------------------------------------------------------------------------------------------------------------------------------------------------------------------------------------------------------------------------------------------------------------------------------------------------------------------------------------------------------------------------------------------------------------------------------------------------------------------------------------------------------------------------------------------------------------------------------------------------------------------------------------------------------------------------------|---------------------------------------------------------------------------------------------------------------------------------------------------------------------------------------------------------------------------------------------------------------------------------------------------------------------------------------------------------------------------------------------------------------------------------------------------------------------------------------------------------------------------------------------------------------------------------------------------------------------------------------------------------------------------------------------------------------------------------------------------------------------------------------------------------------------------------------------------------------------------------------------------------------------------------------------------------------------------------------------------------------------------------------------------------------------------------------------------------------------------------------------------------------------------------------------------------------------------------------------------------------------------------------------------------------------------------------------------------------------------------------------------------------------------------------------------------------------------------------------------------------------------------------------------------------------------------------------------------------------------------------------------------------------------------------------------------------------------------------------------------------------------------------------------------------------------------------------------------------------------------------------------------------------------------------------------------------------------------------------------------------------------------------------------------------------------------------------------------------------------------------------------------------------------------------------------------------------------------------------------------------------------------------------------------------------------------------------------------------------------------------------------------------------------------------------------------------------------------------------------------------------------------------------------------------------------------------------------------------------------------------------------------------------------------------------------------------------------------------------------------------------------------------------------------------------------------------------------------------------------------------------------------------------------------------------------------|



|  |                                                                                                                                                                                                                                                                                                                                                                                                                                                                                                                                                                                                                                                                                                                                                                                                                                                                                                                                                                                                                                                                                                                                                                                                                                                                                                                                                                                                                                                                                                                                                                                                                                                                                                                                                                                                                                                                                                                                    |                                                                                                                                                                                                                                                                                                                                                                                                                                                                                                                                                                                                                                                                                                                                                                                                                                                                                                                                                                                                                                                                                                                                                                                                                                                                                                                                                                                                                                                                                                                                                                                                                                                                                                                                                                                                                                                                                                                                                                                                                                                                                                                                                                                                                                                                                                                                                                                                                                                                                                                                                                                                                                                                                                                                                                                                                                                                                                                                                                                                                                                                                                                                                                                                      |
|--|------------------------------------------------------------------------------------------------------------------------------------------------------------------------------------------------------------------------------------------------------------------------------------------------------------------------------------------------------------------------------------------------------------------------------------------------------------------------------------------------------------------------------------------------------------------------------------------------------------------------------------------------------------------------------------------------------------------------------------------------------------------------------------------------------------------------------------------------------------------------------------------------------------------------------------------------------------------------------------------------------------------------------------------------------------------------------------------------------------------------------------------------------------------------------------------------------------------------------------------------------------------------------------------------------------------------------------------------------------------------------------------------------------------------------------------------------------------------------------------------------------------------------------------------------------------------------------------------------------------------------------------------------------------------------------------------------------------------------------------------------------------------------------------------------------------------------------------------------------------------------------------------------------------------------------|------------------------------------------------------------------------------------------------------------------------------------------------------------------------------------------------------------------------------------------------------------------------------------------------------------------------------------------------------------------------------------------------------------------------------------------------------------------------------------------------------------------------------------------------------------------------------------------------------------------------------------------------------------------------------------------------------------------------------------------------------------------------------------------------------------------------------------------------------------------------------------------------------------------------------------------------------------------------------------------------------------------------------------------------------------------------------------------------------------------------------------------------------------------------------------------------------------------------------------------------------------------------------------------------------------------------------------------------------------------------------------------------------------------------------------------------------------------------------------------------------------------------------------------------------------------------------------------------------------------------------------------------------------------------------------------------------------------------------------------------------------------------------------------------------------------------------------------------------------------------------------------------------------------------------------------------------------------------------------------------------------------------------------------------------------------------------------------------------------------------------------------------------------------------------------------------------------------------------------------------------------------------------------------------------------------------------------------------------------------------------------------------------------------------------------------------------------------------------------------------------------------------------------------------------------------------------------------------------------------------------------------------------------------------------------------------------------------------------------------------------------------------------------------------------------------------------------------------------------------------------------------------------------------------------------------------------------------------------------------------------------------------------------------------------------------------------------------------------------------------------------------------------------------------------------------------------|
|  | <p>141.2, 141.3, 141.4, 141.5,<br/> 141.6, 141.8, 141.9, 142, 142.1,<br/> 142.2, 142.8, 142.9, 143, 143.1,<br/> 143.8, 143.9, 144, 144.1, 144.8,<br/> 144.9, 145, 145.1, 145.2, 145.3,<br/> 145.4, 145.5, 145.6, 145.8,<br/> 145.9, 146, 146.1, 146.2, 146.3,<br/> 146.4, 146.5, 146.6, 146.7,<br/> 146.8, 146.9, 147, 147.1, 147.2,<br/> 147.3, 147.8, 147.9, 148, 148.1,<br/> 148.2, 148.3, 148.8, 148.9, 149,<br/> 149.1, 149.8, 149.9, 150, 150.1,<br/> 150.2, 150.3, 150.4, 150.5,<br/> 150.8, 150.9, 151, 151.1, 151.2,<br/> 151.3, 151.4, 151.5, 151.6,<br/> 151.8, 151.9, 152, 152.1, 152.2,<br/> 152.3, 152.8, 152.9, 153, 153.1,<br/> 153.2, 153.3, 153.4, 153.5,<br/> 153.6, 153.7, 153.8, 153.9, 154,<br/> 154.1, 154.2, 154.3, 154.8, 155,<br/> 155.1, 155.2, 156, 156.1, 156.2,<br/> 156.8, 156.9, 157, 157.1, 157.2,<br/> 157.3, 157.4, 157.8, 157.9, 158,<br/> 158.8, 158.9, 159, 159.1, 159.8,<br/> 159.9, 160, 160.1, 160.2, 160.3,<br/> 160.4, 160.5, 160.8, 160.9, 161,<br/> 161.1, 161.2, 161.3, 161.8,<br/> 161.9, 162, 162.2, 162.3, 162.4,<br/> 162.5, 162.8, 162.9, 163, 163.1,<br/> 163.8, 163.9, 164, 164.1, 164.2,<br/> 164.3, 164.8, 164.9, 165, 165.8,<br/> 165.9, 170, 170.1, 170.2, 170.3,<br/> 170.4, 170.5, 170.6, 170.7,<br/> 170.8, 170.9, 171, 171.2, 171.3,<br/> 171.4, 171.5, 171.6, 171.7,<br/> 171.8, 171.9, 172, 172.1, 172.2,<br/> 172.3, 172.4, 172.5, 172.6,<br/> 172.7, 172.8, 172.9, 174, 174.1,<br/> 174.2, 174.3, 174.4, 174.5,<br/> 174.6, 174.8, 174.9, 175, 175.9,<br/> 176, 176.1, 176.2, 176.3, 176.4,<br/> 176.5, 176.8, 176.9, 179, 180,<br/> 180.1, 180.8, 180.9, 181, 182,<br/> 182.1, 182.8, 183, 183.2, 183.3,<br/> 183.4, 183.5, 183.8, 183.9, 184,<br/> 184.1, 184.2, 184.3, 184.4,<br/> 184.8, 184.9, 185, 186, 186.9,<br/> 187.1, 187.2, 187.3, 187.4,<br/> 187.5, 187.6, 187.7, 187.8,<br/> 187.9, 188, 188.1, 188.2, 188.3,<br/> 188.4, 188.5, 188.6, 188.7,</p> | <p>C17.1, C17.2, C17.3, C17.8, C17.9, C18.0, C18.1, C18.2,<br/> C18.3, C18.4, C18.5, C18.6, C18.7, C18.8, C18.9, C19, C20,<br/> C21.0, C21.1, C21.2, C21.8, C22.0, C22.1, C22.2, C22.3,<br/> C22.4, C22.7, C22.8, C22.9, C23, C24.0, C24.1, C24.8,<br/> C24.9, C25.0, C25.1, C25.2, C25.3, C25.4, C25.7, C25.8,<br/> C25.9, C26.0, C26.1, C26.9, C30.0, C30.1, C31.0, C31.1,<br/> C31.2, C31.3, C31.8, C31.9, C32.0, C32.1, C32.2, C32.3,<br/> C32.8, C32.9, C33, C34.00, C34.01, C34.02, C34.10,<br/> C34.11, C34.12, C34.2, C34.30, C34.31, C34.32, C34.80,<br/> C34.81, C34.82, C34.90, C34.91, C34.92, C37, C38.0,<br/> C38.1, C38.2, C38.3, C38.4, C38.8, C39.0, C39.9, C40.00,<br/> C40.01, C40.02, C40.10, C40.11, C40.12, C40.20, C40.21,<br/> C40.22, C40.30, C40.31, C40.32, C40.80, C40.81, C40.82,<br/> C40.90, C40.91, C40.92, C41.0, C41.1, C41.2, C41.3, C41.4,<br/> C41.9, C43.0, C43.10, C43.11, C43.12, C43.20, C43.21,<br/> C43.22, C43.30, C43.31, C43.39, C43.4, C43.51, C43.52,<br/> C43.59, C43.60, C43.61, C43.62, C43.70, C43.71, C43.72,<br/> C43.8, C43.9, C45.0, C45.1, C45.2, C45.7, C45.9, C46.0,<br/> C46.1, C46.2, C46.3, C46.4, C46.50, C46.51, C46.52, C46.7,<br/> C46.9, C47.0, C47.10, C47.11, C47.12, C47.20, C47.21,<br/> C47.22, C47.3, C47.4, C47.5, C47.6, C47.8, C47.9, C48.0,<br/> C48.1, C48.2, C48.8, C49.0, C49.10, C49.11, C49.12,<br/> C49.20, C49.21, C49.22, C49.3, C49.4, C49.5, C49.6, C49.8,<br/> C49.9, C49.A0, C49.A1, C49.A2, C49.A3, C49.A4, C49.A5,<br/> C49.A9, C50.011, C50.012, C50.019, C50.021, C50.022,<br/> C50.029, C50.111, C50.112, C50.119, C50.121, C50.122,<br/> C50.129, C50.211, C50.212, C50.219, C50.221, C50.222,<br/> C50.229, C50.311, C50.312, C50.319, C50.321, C50.322,<br/> C50.329, C50.411, C50.412, C50.419, C50.421, C50.422,<br/> C50.429, C50.511, C50.512, C50.519, C50.521, C50.522,<br/> C50.529, C50.611, C50.612, C50.619, C50.621, C50.622,<br/> C50.629, C50.811, C50.812, C50.819, C50.821, C50.822,<br/> C50.829, C50.911, C50.912, C50.919, C50.921, C50.922,<br/> C50.929, C51.0, C51.1, C51.2, C51.8, C51.9, C52, C53.0,<br/> C53.1, C53.8, C53.9, C54.0, C54.1, C54.2, C54.3, C54.8,<br/> C54.9, C55, C56.1, C56.2, C56.9, C57.00, C57.01, C57.02,<br/> C57.10, C57.11, C57.12, C57.20, C57.21, C57.22, C57.3,<br/> C57.4, C57.7, C57.8, C57.9, C58, C60.0, C60.1, C60.2,<br/> C60.8, C60.9, C61, C62.00, C62.01, C62.02, C62.10,<br/> C62.11, C62.12, C62.90, C62.91, C62.92, C63.00, C63.01,<br/> C63.02, C63.10, C63.11, C63.12, C63.2, C63.7, C63.8,<br/> C63.9, C64.1, C64.2, C64.9, C65.1, C65.2, C65.9, C66.1,<br/> C66.2, C66.9, C67.0, C67.1, C67.2, C67.3, C67.4, C67.5,<br/> C67.6, C67.7, C67.8, C67.9, C68.0, C68.1, C68.8, C68.9,<br/> C69.00, C69.01, C69.02, C69.10, C69.11, C69.12, C69.20,<br/> C69.21, C69.22, C69.30, C69.31, C69.32, C69.40, C69.41,<br/> C69.42, C69.50, C69.51, C69.52, C69.60, C69.61, C69.62,<br/> C69.80, C69.81, C69.82, C69.90, C69.91, C69.92, C70.0,<br/> C70.1, C70.9, C71.0, C71.1, C71.2, C71.3, C71.4, C71.5,<br/> C71.6, C71.7, C71.8, C71.9, C72.0, C72.1, C72.20, C72.21,<br/> C72.22, C72.30, C72.31, C72.32, C72.40, C72.41, C72.42,</p> |
|--|------------------------------------------------------------------------------------------------------------------------------------------------------------------------------------------------------------------------------------------------------------------------------------------------------------------------------------------------------------------------------------------------------------------------------------------------------------------------------------------------------------------------------------------------------------------------------------------------------------------------------------------------------------------------------------------------------------------------------------------------------------------------------------------------------------------------------------------------------------------------------------------------------------------------------------------------------------------------------------------------------------------------------------------------------------------------------------------------------------------------------------------------------------------------------------------------------------------------------------------------------------------------------------------------------------------------------------------------------------------------------------------------------------------------------------------------------------------------------------------------------------------------------------------------------------------------------------------------------------------------------------------------------------------------------------------------------------------------------------------------------------------------------------------------------------------------------------------------------------------------------------------------------------------------------------|------------------------------------------------------------------------------------------------------------------------------------------------------------------------------------------------------------------------------------------------------------------------------------------------------------------------------------------------------------------------------------------------------------------------------------------------------------------------------------------------------------------------------------------------------------------------------------------------------------------------------------------------------------------------------------------------------------------------------------------------------------------------------------------------------------------------------------------------------------------------------------------------------------------------------------------------------------------------------------------------------------------------------------------------------------------------------------------------------------------------------------------------------------------------------------------------------------------------------------------------------------------------------------------------------------------------------------------------------------------------------------------------------------------------------------------------------------------------------------------------------------------------------------------------------------------------------------------------------------------------------------------------------------------------------------------------------------------------------------------------------------------------------------------------------------------------------------------------------------------------------------------------------------------------------------------------------------------------------------------------------------------------------------------------------------------------------------------------------------------------------------------------------------------------------------------------------------------------------------------------------------------------------------------------------------------------------------------------------------------------------------------------------------------------------------------------------------------------------------------------------------------------------------------------------------------------------------------------------------------------------------------------------------------------------------------------------------------------------------------------------------------------------------------------------------------------------------------------------------------------------------------------------------------------------------------------------------------------------------------------------------------------------------------------------------------------------------------------------------------------------------------------------------------------------------------------------|

|                             |                                                                                                                                                                                                                                                                                                                                                       |                                                                                                                                                                                                                                                                                                                                                                                                                                                                                                                                                                                                                                           |
|-----------------------------|-------------------------------------------------------------------------------------------------------------------------------------------------------------------------------------------------------------------------------------------------------------------------------------------------------------------------------------------------------|-------------------------------------------------------------------------------------------------------------------------------------------------------------------------------------------------------------------------------------------------------------------------------------------------------------------------------------------------------------------------------------------------------------------------------------------------------------------------------------------------------------------------------------------------------------------------------------------------------------------------------------------|
|                             | 188.8, 188.9, 189, 189.1, 189.2, 189.3, 189.4, 189.8, 189.9, 190, 190.1, 190.2, 190.3, 190.4, 190.5, 190.6, 190.7, 190.8, 190.9, 191, 191.1, 191.2, 191.3, 191.4, 191.5, 191.6, 191.7, 191.8, 191.9, 192, 192.1, 192.2, 192.3, 192.8, 192.9, 193, 194, 194.1, 194.3, 194.4, 194.5, 194.6, 194.8, 194.9, 195, 195.1, 195.2, 195.3, 195.4, 195.5, 195.8 | C72.50, C72.59, C72.9, C73, C74.00, C74.01, C74.02, C74.10, C74.11, C74.12, C74.90, C74.91, C74.92, C75.0, C75.1, C75.2, C75.3, C75.4, C75.5, C75.8, C75.9, C76.0, C76.1, C76.2, C76.3, C76.40, C76.41, C76.42, C76.50, C76.51, C76.52, C76.8, C7A.00, C7A.010, C7A.011, C7A.012, C7A.019, C7A.020, C7A.021, C7A.022, C7A.023, C7A.024, C7A.025, C7A.026, C7A.029, C7A.090, C7A.091, C7A.092, C7A.093, C7A.094, C7A.095, C7A.096, C7A.098, C7A.1, C7A.8                                                                                                                                                                                   |
| Cardiac arrhythmia          | 426, 426.1, 426.12, 426.13, 426.7, 426.9, 427, 427.1, 427.2, 427.31, 427.32, 427.41, 427.42, 427.6, 427.61, 427.69, 427.81, 427.89, 427.9, 785, 996.01, 996.04, V45.00, V45.01, V45.02, V45.09, V53.31, V53.32, V53.39                                                                                                                                | I44.1, I44.2, I44.30, I44.39, I45.6, I45.9, I47.0, I47.1, I47.2, I47.9, I48.0, I48.1, I48.2, I48.3, I48.4, I48.91, I48.92, I49.01, I49.02, I49.1, I49.2, I49.3, I49.40, I49.49, I49.5, I49.8, I49.9, R00.0, R00.1, R00.8, T82.110A, T82.110D, T82.110S, T82.111A, T82.111D, T82.111S, T82.118A, T82.118D, T82.118S, T82.119A, T82.119D, T82.119S, T82.120A, T82.120D, T82.120S, T82.121A, T82.121D, T82.121S, T82.128A, T82.128D, T82.128S, T82.129A, T82.129D, T82.129S, T82.190A, T82.190D, T82.190S, T82.191A, T82.191D, T82.191S, T82.198A, T82.198D, T82.198S, T82.199A, T82.199D, T82.199S, Z45.010, Z45.018, Z45.02, Z45.09, Z95.0 |
| Chronic pulmonary disorders | 416.8, 416.9, 490, 491, 491.1, 491.2, 491.21, 491.22, 491.8, 491.9, 492, 492.8, 493, 493.01, 493.02, 493.1, 493.11, 493.12, 493.2, 493.21, 493.22, 493.81, 493.82, 493.9, 493.91, 493.92, 494, 494.1, 495, 495.1, 495.2, 495.3, 495.4, 495.5, 495.6, 495.7, 495.8, 495.9, 496, 500, 501, 502, 503, 504, 505, 506.4, 508.1, 508.8                      | I27.81, I27.82, I27.83, I27.89, I27.9, J40, J41.0, J41.1, J41.8, J42, J43.0, J43.1, J43.2, J43.8, J43.9, J44.0, J44.1, J44.9, J45.20, J45.21, J45.22, J45.30, J45.31, J45.32, J45.40, J45.41, J45.42, J45.50, J45.51, J45.52, J45.901, J45.902, J45.909, J45.990, J45.991, J45.998, J47.0, J47.1, J47.9, J60, J61, J62.0, J62.8, J63.0, J63.1, J63.2, J63.3, J63.4, J63.5, J63.6, J64, J65, J66.0, J66.1, J66.2, J66.8, J67.0, J67.1, J67.2, J67.3, J67.4, J67.5, J67.6, J67.7, J67.8, J67.9, J68.4, J70.1, J70.3                                                                                                                         |
| Coagulopathy                | 286, 286.1, 286.2, 286.3, 286.4, 286.5, 286.52, 286.53, 286.59, 286.6, 286.7, 286.9, 287.1, 287.3, 287.31, 287.32, 287.33, 287.39, 287.4, 287.41, 287.49, 287.5                                                                                                                                                                                       | D65, D66, D67, D68.0, D68.1, D68.2, D68.311, D68.312, D68.318, D68.32, D68.4, D68.51, D68.52, D68.59, D68.61, D68.62, D68.69, D68.8, D68.9, D69.1, D69.3, D69.41, D69.42, D69.49, D69.51, D69.59, D69.6                                                                                                                                                                                                                                                                                                                                                                                                                                   |
| Congestive heart failure    | 398.91, 402.01, 402.11, 402.91, 404.01, 404.03, 404.11, 404.13, 404.91, 404.93, 425.4, 425.5, 425.7, 425.8, 425.9, 428, 428.1, 428.2, 428.21, 428.22, 428.23, 428.3, 428.31, 428.32, 428.33, 428.4, 428.41, 428.42, 428.43, 428.9                                                                                                                     | I09.9, I11.0, I13.0, I13.2, I25.5, I42.0, I42.5, I42.6, I42.7, I42.8, I42.9, I43, I50.1, I50.20, I50.21, I50.22, I50.23, I50.30, I50.31, I50.32, I50.33, I50.40, I50.41, I50.42, I50.43, I50.810, I50.811, I50.812, I50.813, I50.814, I50.82, I50.83, I50.84, I50.89, I50.9, P29.0                                                                                                                                                                                                                                                                                                                                                        |
| Depression                  | 296.2, 296.21, 296.22, 296.23, 296.24, 296.25, 296.26, 296.3, 296.31, 296.32, 296.33, 296.34,                                                                                                                                                                                                                                                         | F31.30, F31.31, F31.32, F31.4, F31.5, F32.0, F32.1, F32.2, F32.3, F32.4, F32.5, F32.8, F32.81, F32.89, F32.9, F33.0, F33.1, F33.2, F33.3, F33.40, F33.41, F33.42, F33.8, F33.9,                                                                                                                                                                                                                                                                                                                                                                                                                                                           |

|          |                                                                                                                                                                                                                                                                                                                    |                                                                                                                                                                                                                                                                                                                                                                                                                                                                                                                                                                                                                                                                                                                                                                                                                                                                                                                                                                                                                                                                                                                                                                                                                                                                                                                                                                                                                                                                                                                                                                                                                                                                                                                                                                                                                                                                                                                                                                                                                                                                                                                                                                                                                                                                                                                 |
|----------|--------------------------------------------------------------------------------------------------------------------------------------------------------------------------------------------------------------------------------------------------------------------------------------------------------------------|-----------------------------------------------------------------------------------------------------------------------------------------------------------------------------------------------------------------------------------------------------------------------------------------------------------------------------------------------------------------------------------------------------------------------------------------------------------------------------------------------------------------------------------------------------------------------------------------------------------------------------------------------------------------------------------------------------------------------------------------------------------------------------------------------------------------------------------------------------------------------------------------------------------------------------------------------------------------------------------------------------------------------------------------------------------------------------------------------------------------------------------------------------------------------------------------------------------------------------------------------------------------------------------------------------------------------------------------------------------------------------------------------------------------------------------------------------------------------------------------------------------------------------------------------------------------------------------------------------------------------------------------------------------------------------------------------------------------------------------------------------------------------------------------------------------------------------------------------------------------------------------------------------------------------------------------------------------------------------------------------------------------------------------------------------------------------------------------------------------------------------------------------------------------------------------------------------------------------------------------------------------------------------------------------------------------|
|          | 296.35, 296.36, 296.5, 296.51, 296.52, 296.53, 296.54, 296.55, 296.56, 300.4, 309, 309.1, 309.21, 309.22, 309.23, 309.24, 309.28, 309.29, 309.3, 309.4, 309.81, 309.82, 309.83, 309.89, 309.9, 311                                                                                                                 | F34.1, F43.20, F43.21, F43.22, F43.23, F43.24, F43.25, F43.29                                                                                                                                                                                                                                                                                                                                                                                                                                                                                                                                                                                                                                                                                                                                                                                                                                                                                                                                                                                                                                                                                                                                                                                                                                                                                                                                                                                                                                                                                                                                                                                                                                                                                                                                                                                                                                                                                                                                                                                                                                                                                                                                                                                                                                                   |
| Diabetes | 250.4, 250.41, 250.42, 250.43, 250.5, 250.51, 250.52, 250.53, 250.6, 250.61, 250.62, 250.63, 250.7, 250.71, 250.72, 250.73, 250.8, 250.81, 250.82, 250.83, 250.9, 250.91, 250.92, 250.93, 250, 250.01, 250.02, 250.03, 250.1, 250.11, 250.12, 250.13, 250.2, 250.21, 250.22, 250.23, 250.3, 250.31, 250.32, 250.33 | E10.21, E10.22, E10.29, E10.311, E10.319, E10.321, E10.3211, E10.3212, E10.3213, E10.3219, E10.329, E10.3291, E10.3292, E10.3293, E10.3299, E10.331, E10.3311, E10.3312, E10.3313, E10.3319, E10.339, E10.3391, E10.3392, E10.3393, E10.3399, E10.341, E10.3411, E10.3412, E10.3413, E10.3419, E10.349, E10.3491, E10.3492, E10.3493, E10.3499, E10.351, E10.3511, E10.3512, E10.3513, E10.3519, E10.3521, E10.3522, E10.3523, E10.3529, E10.3531, E10.3532, E10.3533, E10.3539, E10.3541, E10.3542, E10.3543, E10.3549, E10.3551, E10.3552, E10.3553, E10.3559, E10.359, E10.3591, E10.3592, E10.3593, E10.3599, E10.36, E10.37X1, E10.37X2, E10.37X3, E10.37X9, E10.39, E10.40, E10.41, E10.42, E10.43, E10.44, E10.49, E10.51, E10.52, E10.59, E10.610, E10.618, E10.620, E10.621, E10.622, E10.628, E10.630, E10.638, E10.641, E10.649, E10.65, E10.69, E10.8, E11.21, E11.22, E11.29, E11.311, E11.319, E11.321, E11.3211, E11.3212, E11.3213, E11.3219, E11.329, E11.3291, E11.3292, E11.3293, E11.3299, E11.331, E11.3311, E11.3312, E11.3313, E11.3319, E11.339, E11.3391, E11.3392, E11.3393, E11.3399, E11.341, E11.3411, E11.3412, E11.3413, E11.3419, E11.349, E11.3491, E11.3492, E11.3493, E11.3499, E11.351, E11.3511, E11.3512, E11.3513, E11.3519, E11.3521, E11.3522, E11.3523, E11.3529, E11.3531, E11.3532, E11.3533, E11.3539, E11.3541, E11.3542, E11.3543, E11.3549, E11.3551, E11.3552, E11.3553, E11.3559, E11.359, E11.3591, E11.3592, E11.3593, E11.3599, E11.36, E11.37X1, E11.37X2, E11.37X3, E11.37X9, E11.39, E11.40, E11.41, E11.42, E11.43, E11.44, E11.49, E11.51, E11.52, E11.59, E11.610, E11.618, E11.620, E11.621, E11.622, E11.628, E11.630, E11.638, E11.641, E11.649, E11.65, E11.69, E11.8, E13.21, E13.22, E13.29, E13.311, E13.319, E13.321, E13.3211, E13.3212, E13.3213, E13.3219, E13.329, E13.3291, E13.3292, E13.3293, E13.3299, E13.331, E13.3311, E13.3312, E13.3313, E13.3319, E13.339, E13.3391, E13.3392, E13.3393, E13.3399, E13.341, E13.3411, E13.3412, E13.3413, E13.3419, E13.349, E13.3491, E13.3492, E13.3493, E13.3499, E13.351, E13.3511, E13.3512, E13.3513, E13.3519, E13.3521, E13.3522, E13.3523, E13.3529, E13.3531, E13.3532, E13.3533, E13.3539, E13.3541, E13.3542, E13.3543, E13.3549, E13.3551, E13.3552, E13.3553, E13.3559, E13.359, |

|            |                                                                                                                                                                                                                                                                                                                                                                                                                                                                                                                                                                                                                                                                       |                                                                                                                                                                                                                                                                                                                                                                                                                                                                                                                                                                                                                                                                                                                                                                                                                                                                                                                                                                                                                                                                                                                                                                                                                                                                                                                                                                                                                                                                                                                                                                                                                                                                                                                                                                                                                                                                                                                                                                                                                                                                                                                                                                                                                                                                                                                                            |
|------------|-----------------------------------------------------------------------------------------------------------------------------------------------------------------------------------------------------------------------------------------------------------------------------------------------------------------------------------------------------------------------------------------------------------------------------------------------------------------------------------------------------------------------------------------------------------------------------------------------------------------------------------------------------------------------|--------------------------------------------------------------------------------------------------------------------------------------------------------------------------------------------------------------------------------------------------------------------------------------------------------------------------------------------------------------------------------------------------------------------------------------------------------------------------------------------------------------------------------------------------------------------------------------------------------------------------------------------------------------------------------------------------------------------------------------------------------------------------------------------------------------------------------------------------------------------------------------------------------------------------------------------------------------------------------------------------------------------------------------------------------------------------------------------------------------------------------------------------------------------------------------------------------------------------------------------------------------------------------------------------------------------------------------------------------------------------------------------------------------------------------------------------------------------------------------------------------------------------------------------------------------------------------------------------------------------------------------------------------------------------------------------------------------------------------------------------------------------------------------------------------------------------------------------------------------------------------------------------------------------------------------------------------------------------------------------------------------------------------------------------------------------------------------------------------------------------------------------------------------------------------------------------------------------------------------------------------------------------------------------------------------------------------------------|
|            |                                                                                                                                                                                                                                                                                                                                                                                                                                                                                                                                                                                                                                                                       | E13.3591, E13.3592, E13.3593, E13.3599, E13.36, E13.37X1, E13.37X2, E13.37X3, E13.37X9, E13.39, E13.40, E13.41, E13.42, E13.43, E13.44, E13.49, E13.51, E13.52, E13.59, E13.610, E13.618, E13.620, E13.621, E13.622, E13.628, E13.630, E13.638, E13.641, E13.649, E13.65, E13.69, E13.8, E10.10, E10.11, E10.9, E11.00, E11.01, E11.10, E11.11, E11.9, E13.00, E13.01, E13.10, E13.11, E13.9                                                                                                                                                                                                                                                                                                                                                                                                                                                                                                                                                                                                                                                                                                                                                                                                                                                                                                                                                                                                                                                                                                                                                                                                                                                                                                                                                                                                                                                                                                                                                                                                                                                                                                                                                                                                                                                                                                                                               |
| Drug abuse | 292, 292.11, 292.12, 292.2, 292.81, 292.82, 292.83, 292.84, 292.85, 292.89, 292.9, 304, 304.01, 304.02, 304.03, 304.1, 304.11, 304.12, 304.13, 304.2, 304.21, 304.22, 304.23, 304.3, 304.31, 304.32, 304.33, 304.4, 304.41, 304.42, 304.43, 304.5, 304.51, 304.52, 304.53, 304.6, 304.61, 304.62, 304.63, 304.7, 304.71, 304.72, 304.73, 304.8, 304.81, 304.82, 304.83, 304.9, 304.91, 304.92, 304.93, 305.2, 305.21, 305.22, 305.23, 305.3, 305.31, 305.32, 305.33, 305.4, 305.41, 305.42, 305.43, 305.5, 305.51, 305.52, 305.53, 305.6, 305.61, 305.62, 305.63, 305.7, 305.71, 305.72, 305.73, 305.8, 305.81, 305.82, 305.83, 305.9, 305.91, 305.92, 305.93, V65.42 | F11.10, F11.11, F11.120, F11.121, F11.122, F11.129, F11.14, F11.150, F11.151, F11.159, F11.181, F11.182, F11.188, F11.19, F11.20, F11.21, F11.220, F11.221, F11.222, F11.229, F11.23, F11.24, F11.250, F11.251, F11.259, F11.281, F11.282, F11.288, F11.29, F11.90, F11.920, F11.921, F11.922, F11.929, F11.93, F11.94, F11.950, F11.951, F11.959, F11.981, F11.982, F11.988, F11.99, F12.10, F12.11, F12.120, F12.121, F12.122, F12.129, F12.150, F12.151, F12.159, F12.180, F12.188, F12.19, F12.20, F12.21, F12.220, F12.221, F12.222, F12.229, F12.250, F12.251, F12.259, F12.280, F12.288, F12.29, F12.90, F12.920, F12.921, F12.922, F12.929, F12.950, F12.951, F12.959, F12.980, F12.988, F12.99, F13.10, F13.11, F13.120, F13.121, F13.129, F13.14, F13.150, F13.151, F13.159, F13.180, F13.181, F13.182, F13.188, F13.19, F13.20, F13.21, F13.220, F13.221, F13.229, F13.230, F13.231, F13.232, F13.239, F13.24, F13.250, F13.251, F13.259, F13.26, F13.27, F13.280, F13.281, F13.282, F13.288, F13.29, F13.90, F13.920, F13.921, F13.929, F13.930, F13.931, F13.932, F13.939, F13.94, F13.950, F13.951, F13.959, F13.96, F13.97, F13.980, F13.981, F13.982, F13.988, F13.99, F14.10, F14.11, F14.120, F14.121, F14.122, F14.129, F14.14, F14.150, F14.151, F14.159, F14.180, F14.181, F14.182, F14.188, F14.19, F14.20, F14.21, F14.220, F14.221, F14.222, F14.229, F14.23, F14.24, F14.250, F14.251, F14.259, F14.280, F14.281, F14.282, F14.288, F14.29, F14.90, F14.920, F14.921, F14.922, F14.929, F14.94, F14.950, F14.951, F14.959, F14.980, F14.981, F14.982, F14.988, F14.99, F15.10, F15.11, F15.120, F15.121, F15.122, F15.129, F15.14, F15.150, F15.151, F15.159, F15.180, F15.181, F15.182, F15.188, F15.19, F15.20, F15.21, F15.220, F15.221, F15.222, F15.229, F15.23, F15.24, F15.250, F15.251, F15.259, F15.280, F15.281, F15.282, F15.288, F15.29, F15.90, F15.920, F15.921, F15.922, F15.929, F15.93, F15.94, F15.950, F15.951, F15.959, F15.980, F15.981, F15.982, F15.988, F15.99, F16.10, F16.11, F16.120, F16.121, F16.122, F16.129, F16.14, F16.150, F16.151, F16.159, F16.180, F16.183, F16.188, F16.19, F16.20, F16.21, F16.220, F16.221, F16.229, F16.24, F16.250, F16.251, F16.259, F16.280, F16.283, F16.288, F16.29, F16.90, F16.920, F16.921, F16.929, F16.94, F16.950, F16.951, F16.959, F16.980, |

|                             |                                                                                                                                                                                                                                                    |                                                                                                                                                                                                                                                                                                                                                                                                                                                                                                                                                                                                                                                                                                                                                                                                                                                                                                           |
|-----------------------------|----------------------------------------------------------------------------------------------------------------------------------------------------------------------------------------------------------------------------------------------------|-----------------------------------------------------------------------------------------------------------------------------------------------------------------------------------------------------------------------------------------------------------------------------------------------------------------------------------------------------------------------------------------------------------------------------------------------------------------------------------------------------------------------------------------------------------------------------------------------------------------------------------------------------------------------------------------------------------------------------------------------------------------------------------------------------------------------------------------------------------------------------------------------------------|
|                             |                                                                                                                                                                                                                                                    | F16.983, F16.988, F16.99, F18.10, F18.11, F18.120, F18.121, F18.129, F18.14, F18.150, F18.151, F18.159, F18.17, F18.180, F18.188, F18.19, F18.20, F18.21, F18.220, F18.221, F18.229, F18.24, F18.250, F18.251, F18.259, F18.27, F18.280, F18.288, F18.29, F18.90, F18.920, F18.921, F18.929, F18.94, F18.950, F18.951, F18.959, F18.97, F18.980, F18.988, F18.99, F19.10, F19.11, F19.120, F19.121, F19.122, F19.129, F19.14, F19.150, F19.151, F19.159, F19.16, F19.17, F19.180, F19.181, F19.182, F19.188, F19.19, F19.20, F19.21, F19.220, F19.221, F19.222, F19.229, F19.230, F19.231, F19.232, F19.239, F19.24, F19.250, F19.251, F19.259, F19.26, F19.27, F19.280, F19.281, F19.282, F19.288, F19.29, F19.90, F19.920, F19.921, F19.922, F19.929, F19.930, F19.931, F19.932, F19.939, F19.94, F19.950, F19.951, F19.959, F19.96, F19.97, F19.980, F19.981, F19.982, F19.988, F19.99, Z71.51, Z71.52 |
| Fluid electrolyte disorder  | 253.6, 276, 276.1, 276.2, 276.3, 276.4, 276.5, 276.51, 276.52, 276.6, 276.61, 276.69, 276.7, 276.8, 276.9                                                                                                                                          | E22.2, E86.0, E86.1, E86.9, E87.0, E87.1, E87.2, E87.3, E87.4, E87.5, E87.6, E87.70, E87.71, E87.79, E87.8                                                                                                                                                                                                                                                                                                                                                                                                                                                                                                                                                                                                                                                                                                                                                                                                |
| Hypertension                | 402, 402.01, 402.1, 402.11, 402.9, 402.91, 403, 403.01, 403.1, 403.11, 403.9, 403.91, 404, 404.01, 404.02, 404.03, 404.1, 404.11, 404.12, 404.13, 404.9, 404.91, 404.92, 404.93, 405.01, 405.09, 405.11, 405.19, 405.91, 405.99, 401, 401.1, 401.9 | I11.0, I11.9, I12.0, I12.9, I13.0, I13.10, I13.11, I13.2, I15.0, I15.1, I15.2, I15.8, I15.9, I10                                                                                                                                                                                                                                                                                                                                                                                                                                                                                                                                                                                                                                                                                                                                                                                                          |
| Hypothyroidism              | 240.9, 243, 244, 244.1, 244.2, 244.3, 244.8, 244.9, 246.1, 246.8                                                                                                                                                                                   | E00.0, E00.1, E00.2, E00.9, E01.0, E01.1, E01.2, E01.8, E02, E03.0, E03.1, E03.2, E03.3, E03.4, E03.5, E03.8, E03.9, E89.0                                                                                                                                                                                                                                                                                                                                                                                                                                                                                                                                                                                                                                                                                                                                                                                |
| Iron deficiency anaemia     | 280                                                                                                                                                                                                                                                | D50.0                                                                                                                                                                                                                                                                                                                                                                                                                                                                                                                                                                                                                                                                                                                                                                                                                                                                                                     |
| Liver disease               | 70.22, 70.23, 70.32, 70.33, 70.44, 70.54, 70.6, 70.9, 456, 456.1, 456.2, 456.21, 570, 571, 571.1, 571.2, 571.3, 571.4, 571.41, 571.42, 571.49, 571.5, 571.6, 571.8, 571.9, 572.2, 572.3, 572.4, 572.8, 573.3, 573.4, 573.8, 573.9, V42.7           | B18.0, B18.1, B18.2, B18.8, B18.9, I85.00, I85.01, I85.10, I85.11, I86.4, K70.0, K70.10, K70.11, K70.2, K70.30, K70.31, K70.40, K70.41, K70.9, K71.10, K71.11, K71.3, K71.4, K71.50, K71.51, K71.7, K72.00, K72.01, K72.10, K72.11, K72.90, K72.91, K73.0, K73.1, K73.2, K73.8, K73.9, K74.0, K74.1, K74.2, K74.3, K74.4, K74.5, K74.60, K74.69, K76.0, K76.2, K76.3, K76.4, K76.5, K76.6, K76.7, K76.81, K76.89, K76.9, Z94.4                                                                                                                                                                                                                                                                                                                                                                                                                                                                            |
| Obesity                     | 278, 278.01, 278.02, 278.03                                                                                                                                                                                                                        | E66.01, E66.09, E66.1, E66.2, E66.3, E66.8, E66.9                                                                                                                                                                                                                                                                                                                                                                                                                                                                                                                                                                                                                                                                                                                                                                                                                                                         |
| Other neurological disorder | 331.9, 332, 332.1, 333.4, 333.5, 333.92, 334, 334.1, 334.2, 334.3, 334.4, 334.8, 334.9, 335, 335.1, 335.11, 335.19, 335.2, 335.21, 335.22, 335.23, 335.24, 335.29, 335.8, 335.9, 336.2, 340, 341, 341.1, 341.2, 341.21, 341.22,                    | G10, G11.0, G11.1, G11.2, G11.3, G11.4, G11.8, G11.9, G12.0, G12.1, G12.20, G12.21, G12.22, G12.23, G12.24, G12.25, G12.29, G12.8, G12.9, G13.0, G13.1, G13.2, G13.8, G20, G21.0, G21.11, G21.19, G21.2, G21.3, G21.4, G21.8, G21.9, G25.4, G25.5, G31.2, G31.81, G31.82, G31.83, G31.84, G31.85, G31.89, G31.9, G32.0, G32.81, G32.89, G35, G36.0, G36.1, G36.8, G36.9, G37.0, G37.1, G37.2,                                                                                                                                                                                                                                                                                                                                                                                                                                                                                                             |

|                                 |                                                                                                                                                                                                                                                                                                                                                                                                                                                                                                                                                                                                                                                   |                                                                                                                                                                                                                                                                                                                                                                                                                                                                                                                                                      |
|---------------------------------|---------------------------------------------------------------------------------------------------------------------------------------------------------------------------------------------------------------------------------------------------------------------------------------------------------------------------------------------------------------------------------------------------------------------------------------------------------------------------------------------------------------------------------------------------------------------------------------------------------------------------------------------------|------------------------------------------------------------------------------------------------------------------------------------------------------------------------------------------------------------------------------------------------------------------------------------------------------------------------------------------------------------------------------------------------------------------------------------------------------------------------------------------------------------------------------------------------------|
|                                 | 341.8, 341.9, 345, 345.01, 345.1, 345.11, 345.2, 345.3, 345.4, 345.41, 345.5, 345.51, 345.6, 345.61, 345.7, 345.71, 345.8, 345.81, 345.9, 345.91, 348.1, 348.3, 348.31, 348.39, 780.31, 780.32, 780.33, 780.39, 784.3                                                                                                                                                                                                                                                                                                                                                                                                                             | G37.3, G37.4, G37.5, G37.8, G37.9, G40.001, G40.009, G40.011, G40.019, G40.101, G40.109, G40.111, G40.119, G40.201, G40.209, G40.211, G40.219, G40.301, G40.309, G40.311, G40.319, G40.401, G40.409, G40.411, G40.419, G40.501, G40.509, G40.801, G40.802, G40.803, G40.804, G40.811, G40.812, G40.813, G40.814, G40.821, G40.822, G40.823, G40.824, G40.89, G40.901, G40.909, G40.911, G40.919, G40.A01, G40.A09, G40.A11, G40.A19, G40.B01, G40.B09, G40.B11, G40.B19, G93.1, G93.40, G93.41, G93.49, R47.01, R47.02, R56.00, R56.01, R56.1, R56.9 |
| Paralysis                       | 334.1, 342, 342.01, 342.02, 342.1, 342.11, 342.12, 342.8, 342.81, 342.82, 342.9, 342.91, 342.92, 343, 343.1, 343.2, 343.3, 343.4, 343.8, 343.9, 344, 344.01, 344.02, 344.03, 344.04, 344.09, 344.1, 344.2, 344.3, 344.31, 344.32, 344.4, 344.41, 344.42, 344.5, 344.6, 344.61, 344.9                                                                                                                                                                                                                                                                                                                                                              | G04.1, G11.4, G80.1, G80.2, G81.00, G81.01, G81.02, G81.03, G81.04, G81.10, G81.11, G81.12, G81.13, G81.14, G81.90, G81.91, G81.92, G81.93, G81.94, G82.20, G82.21, G82.22, G82.50, G82.51, G82.52, G82.53, G82.54, G83.0, G83.10, G83.11, G83.12, G83.13, G83.14, G83.20, G83.21, G83.22, G83.23, G83.24, G83.30, G83.31, G83.32, G83.33, G83.34, G83.4, G83.9                                                                                                                                                                                      |
| Peptic ulcer disease            | 531.7, 531.71, 531.9, 531.91, 532.7, 532.71, 532.9, 532.91, 533.7, 533.71, 533.9, 533.91, 534.7, 534.71, 534.9, 534.91                                                                                                                                                                                                                                                                                                                                                                                                                                                                                                                            | K25.7, K25.9, K26.7, K26.9, K27.7, K27.9, K28.7, K28.9                                                                                                                                                                                                                                                                                                                                                                                                                                                                                               |
| Psychoses                       | 293.81, 293.82, 293.83, 293.84, 293.89, 295, 295.01, 295.02, 295.03, 295.04, 295.05, 295.1, 295.11, 295.12, 295.13, 295.14, 295.15, 295.2, 295.21, 295.22, 295.23, 295.24, 295.25, 295.3, 295.31, 295.32, 295.33, 295.34, 295.35, 295.4, 295.41, 295.42, 295.43, 295.44, 295.45, 295.5, 295.51, 295.52, 295.53, 295.54, 295.55, 295.6, 295.61, 295.62, 295.63, 295.64, 295.65, 295.7, 295.71, 295.72, 295.73, 295.74, 295.75, 295.8, 295.81, 295.82, 295.83, 295.84, 295.85, 295.9, 295.91, 295.92, 295.93, 295.94, 295.95, 296.04, 296.14, 296.44, 296.54, 297, 297.1, 297.2, 297.3, 297.8, 297.9, 298, 298.1, 298.2, 298.3, 298.4, 298.8, 298.9 | F20.0, F20.1, F20.2, F20.3, F20.5, F20.81, F20.89, F20.9, F22, F23, F24, F25.0, F25.1, F25.8, F25.9, F28, F29, F30.2, F31.2, F31.5                                                                                                                                                                                                                                                                                                                                                                                                                   |
| Pulmonary circulatory disorders | 415, 415.11, 415.12, 415.13, 415.19, 416, 416.1, 416.2, 416.8, 416.9, 417, 417.8, 417.9                                                                                                                                                                                                                                                                                                                                                                                                                                                                                                                                                           | I26.01, I26.02, I26.09, I26.90, I26.92, I26.99, I27.0, I27.1, I27.2, I27.20, I27.21, I27.22, I27.23, I27.24, I27.29, I27.81, I27.82, I27.83, I27.89, I27.9, I28.0, I28.8, I28.9                                                                                                                                                                                                                                                                                                                                                                      |
| Renal failure                   | 403.01, 403.11, 403.91, 404.02, 404.03, 404.12, 404.13, 404.92, 404.93, 585.1, 585.2, 585.3, 585.4, 585.5, 585.6, 585.9, 586, 588, V42.0, V45.1, V45.11,                                                                                                                                                                                                                                                                                                                                                                                                                                                                                          | I12.0, I13.10, I13.11, N18.1, N18.2, N18.3, N18.4, N18.5, N18.6, N18.9, N19, N25.0, Z49.01, Z49.02, Z94.0, Z99.2                                                                                                                                                                                                                                                                                                                                                                                                                                     |

|                      |                                                                                                                                                                                                                                                                                                                                                                                                                                             |                                                                                                                                                                                                                                                                                                                                                                                                                                                                                                                                                                                                                                                                                                                                                                                                                                                                                                                                                                                                                                                                                                                                                                                                                                                                                                                                                                                                                                                                                                                                                                                                                                                                                                                                                                                                                                                                                                                                                                                                                                                                                                                                                                                                                                                                                                                                                                                                                                                                                                                                                                                                                                                                                                                        |
|----------------------|---------------------------------------------------------------------------------------------------------------------------------------------------------------------------------------------------------------------------------------------------------------------------------------------------------------------------------------------------------------------------------------------------------------------------------------------|------------------------------------------------------------------------------------------------------------------------------------------------------------------------------------------------------------------------------------------------------------------------------------------------------------------------------------------------------------------------------------------------------------------------------------------------------------------------------------------------------------------------------------------------------------------------------------------------------------------------------------------------------------------------------------------------------------------------------------------------------------------------------------------------------------------------------------------------------------------------------------------------------------------------------------------------------------------------------------------------------------------------------------------------------------------------------------------------------------------------------------------------------------------------------------------------------------------------------------------------------------------------------------------------------------------------------------------------------------------------------------------------------------------------------------------------------------------------------------------------------------------------------------------------------------------------------------------------------------------------------------------------------------------------------------------------------------------------------------------------------------------------------------------------------------------------------------------------------------------------------------------------------------------------------------------------------------------------------------------------------------------------------------------------------------------------------------------------------------------------------------------------------------------------------------------------------------------------------------------------------------------------------------------------------------------------------------------------------------------------------------------------------------------------------------------------------------------------------------------------------------------------------------------------------------------------------------------------------------------------------------------------------------------------------------------------------------------------|
|                      | V45.12, V56.0, V56.1, V56.2, V56.31, V56.32, V56.8                                                                                                                                                                                                                                                                                                                                                                                          |                                                                                                                                                                                                                                                                                                                                                                                                                                                                                                                                                                                                                                                                                                                                                                                                                                                                                                                                                                                                                                                                                                                                                                                                                                                                                                                                                                                                                                                                                                                                                                                                                                                                                                                                                                                                                                                                                                                                                                                                                                                                                                                                                                                                                                                                                                                                                                                                                                                                                                                                                                                                                                                                                                                        |
| Rheumatoid arthritis | 446, 446.1, 446.2, 446.21, 446.29, 446.3, 446.4, 446.5, 446.6, 446.7, 701, 710, 710.1, 710.2, 710.3, 710.4, 710.8, 710.9, 711.2, 711.21, 711.22, 711.23, 711.24, 711.25, 711.26, 711.27, 711.28, 711.29, 714, 714.1, 714.2, 714.3, 714.31, 714.32, 714.33, 714.4, 714.81, 714.89, 714.9, 719.3, 719.31, 719.32, 719.33, 719.34, 719.35, 719.36, 719.37, 719.38, 719.39, 720, 720.1, 720.2, 720.81, 720.89, 720.9, 725, 728.5, 728.89, 729.3 | L94.0, L94.1, L94.3, M05.00, M05.011, M05.012, M05.019, M05.021, M05.022, M05.029, M05.031, M05.032, M05.039, M05.041, M05.042, M05.049, M05.051, M05.052, M05.059, M05.061, M05.062, M05.069, M05.071, M05.072, M05.079, M05.09, M05.10, M05.111, M05.112, M05.119, M05.121, M05.122, M05.129, M05.131, M05.132, M05.139, M05.141, M05.142, M05.149, M05.151, M05.152, M05.159, M05.161, M05.162, M05.169, M05.171, M05.172, M05.179, M05.19, M05.20, M05.211, M05.212, M05.219, M05.221, M05.222, M05.229, M05.231, M05.232, M05.239, M05.241, M05.242, M05.249, M05.251, M05.252, M05.259, M05.261, M05.262, M05.269, M05.271, M05.272, M05.279, M05.29, M05.30, M05.311, M05.312, M05.319, M05.321, M05.322, M05.329, M05.331, M05.332, M05.339, M05.341, M05.342, M05.349, M05.351, M05.352, M05.359, M05.361, M05.362, M05.369, M05.371, M05.372, M05.379, M05.39, M05.40, M05.411, M05.412, M05.419, M05.421, M05.422, M05.429, M05.431, M05.432, M05.439, M05.441, M05.442, M05.449, M05.451, M05.452, M05.459, M05.461, M05.462, M05.469, M05.471, M05.472, M05.479, M05.49, M05.50, M05.511, M05.512, M05.519, M05.521, M05.522, M05.529, M05.531, M05.532, M05.539, M05.541, M05.542, M05.549, M05.551, M05.552, M05.559, M05.561, M05.562, M05.569, M05.571, M05.572, M05.579, M05.59, M05.60, M05.611, M05.612, M05.619, M05.621, M05.622, M05.629, M05.631, M05.632, M05.639, M05.641, M05.642, M05.649, M05.651, M05.652, M05.659, M05.661, M05.662, M05.669, M05.671, M05.672, M05.679, M05.69, M05.70, M05.711, M05.712, M05.719, M05.721, M05.722, M05.729, M05.731, M05.732, M05.739, M05.741, M05.742, M05.749, M05.751, M05.752, M05.759, M05.761, M05.762, M05.769, M05.771, M05.772, M05.779, M05.79, M05.80, M05.811, M05.812, M05.819, M05.821, M05.822, M05.829, M05.831, M05.832, M05.839, M05.841, M05.842, M05.849, M05.851, M05.852, M05.859, M05.861, M05.862, M05.869, M05.871, M05.872, M05.879, M05.89, M05.9, M06.00, M06.011, M06.012, M06.019, M06.021, M06.022, M06.029, M06.031, M06.032, M06.039, M06.041, M06.042, M06.049, M06.051, M06.052, M06.059, M06.061, M06.062, M06.069, M06.071, M06.072, M06.079, M06.08, M06.09, M06.1, M06.20, M06.211, M06.212, M06.219, M06.221, M06.222, M06.229, M06.231, M06.232, M06.239, M06.241, M06.242, M06.249, M06.251, M06.252, M06.259, M06.261, M06.262, M06.269, M06.271, M06.272, M06.279, M06.28, M06.29, M06.30, M06.311, M06.312, M06.319, M06.321, M06.322, M06.329, M06.331, M06.332, M06.339, M06.341, M06.342, M06.349, M06.351, M06.352, M06.359, M06.361, M06.362, M06.369, M06.371, M06.372, M06.379, M06.38, M06.39, M06.4, M06.80, M06.811, M06.812, M06.819, M06.821, M06.822, M06.829, M06.831, M06.832, M06.839, |

|               |                                                                                                                                                                                                   |                                                                                                                                                                                                                                                                                                                                                                                                                                                                                                                                                                                                                                                                                                                                                                                                                                                                                                                                                                                                                                                                                                                                                                                                                                                                                                                                                                                                                                                                                                                                                                                                                                                                                                                                                                                                                                                                                                                                                                                                                                                                                                                                                                                                                                                                                                                                                                                                                                 |
|---------------|---------------------------------------------------------------------------------------------------------------------------------------------------------------------------------------------------|---------------------------------------------------------------------------------------------------------------------------------------------------------------------------------------------------------------------------------------------------------------------------------------------------------------------------------------------------------------------------------------------------------------------------------------------------------------------------------------------------------------------------------------------------------------------------------------------------------------------------------------------------------------------------------------------------------------------------------------------------------------------------------------------------------------------------------------------------------------------------------------------------------------------------------------------------------------------------------------------------------------------------------------------------------------------------------------------------------------------------------------------------------------------------------------------------------------------------------------------------------------------------------------------------------------------------------------------------------------------------------------------------------------------------------------------------------------------------------------------------------------------------------------------------------------------------------------------------------------------------------------------------------------------------------------------------------------------------------------------------------------------------------------------------------------------------------------------------------------------------------------------------------------------------------------------------------------------------------------------------------------------------------------------------------------------------------------------------------------------------------------------------------------------------------------------------------------------------------------------------------------------------------------------------------------------------------------------------------------------------------------------------------------------------------|
|               |                                                                                                                                                                                                   | M06.841, M06.842, M06.849, M06.851, M06.852, M06.859, M06.861, M06.862, M06.869, M06.871, M06.872, M06.879, M06.88, M06.89, M06.9, M08.00, M08.011, M08.012, M08.019, M08.021, M08.022, M08.029, M08.031, M08.032, M08.039, M08.041, M08.042, M08.049, M08.051, M08.052, M08.059, M08.061, M08.062, M08.069, M08.071, M08.072, M08.079, M08.08, M08.09, M08.1, M08.20, M08.211, M08.212, M08.219, M08.221, M08.222, M08.229, M08.231, M08.232, M08.239, M08.241, M08.242, M08.249, M08.251, M08.252, M08.259, M08.261, M08.262, M08.269, M08.271, M08.272, M08.279, M08.28, M08.29, M08.3, M08.40, M08.411, M08.412, M08.419, M08.421, M08.422, M08.429, M08.431, M08.432, M08.439, M08.441, M08.442, M08.449, M08.451, M08.452, M08.459, M08.461, M08.462, M08.469, M08.471, M08.472, M08.479, M08.48, M08.80, M08.811, M08.812, M08.819, M08.821, M08.822, M08.829, M08.831, M08.832, M08.839, M08.841, M08.842, M08.849, M08.851, M08.852, M08.859, M08.861, M08.862, M08.869, M08.871, M08.872, M08.879, M08.88, M08.89, M08.90, M08.911, M08.912, M08.919, M08.921, M08.922, M08.929, M08.931, M08.932, M08.939, M08.941, M08.942, M08.949, M08.951, M08.952, M08.959, M08.961, M08.962, M08.969, M08.971, M08.972, M08.979, M08.98, M08.99, M12.00, M12.011, M12.012, M12.019, M12.021, M12.022, M12.029, M12.031, M12.032, M12.039, M12.041, M12.042, M12.049, M12.051, M12.052, M12.059, M12.061, M12.062, M12.069, M12.071, M12.072, M12.079, M12.08, M12.09, M12.30, M12.311, M12.312, M12.319, M12.321, M12.322, M12.329, M12.331, M12.332, M12.339, M12.341, M12.342, M12.349, M12.351, M12.352, M12.359, M12.361, M12.362, M12.369, M12.371, M12.372, M12.379, M12.38, M12.39, M30.0, M30.1, M30.2, M30.3, M30.8, M31.0, M31.1, M31.2, M31.30, M31.31, M32.0, M32.10, M32.11, M32.12, M32.13, M32.14, M32.15, M32.19, M32.8, M32.9, M33.00, M33.01, M33.02, M33.03, M33.09, M33.10, M33.11, M33.12, M33.13, M33.19, M33.20, M33.21, M33.22, M33.29, M33.90, M33.91, M33.92, M33.93, M33.99, M34.0, M34.1, M34.2, M34.81, M34.82, M34.83, M34.89, M34.9, M35.00, M35.01, M35.02, M35.03, M35.04, M35.09, M35.1, M35.2, M35.3, M35.4, M35.5, M35.6, M35.7, M35.8, M35.9, M45.0, M45.1, M45.2, M45.3, M45.4, M45.5, M45.6, M45.7, M45.8, M45.9, M46.1, M46.80, M46.81, M46.82, M46.83, M46.84, M46.85, M46.86, M46.87, M46.88, M46.89, M46.90, M46.91, M46.92, M46.93, M46.94, M46.95, M46.96, M46.97, M46.98, M46.99 |
| Valve disease | 93.2, 93.21, 93.22, 93.23, 93.24, 394, 394.1, 394.2, 394.9, 395, 395.1, 395.2, 395.9, 396, 396.1, 396.2, 396.3, 396.8, 396.9, 397, 397.1, 397.9, 424, 424.1, 424.2, 424.3, 424.9, 424.91, 424.99, | A52.00, A52.01, A52.02, A52.03, A52.04, A52.05, A52.06, A52.09, I05.0, I05.1, I05.2, I05.8, I05.9, I06.0, I06.1, I06.2, I06.8, I06.9, I07.0, I07.1, I07.2, I07.8, I07.9, I08.0, I08.1, I08.2, I08.3, I08.8, I08.9, I09.1, I09.81, I09.89, I34.0, I34.1, I34.2, I34.8, I34.9, I35.0, I35.1, I35.2, I35.8, I35.9, I36.0, I36.1, I36.2, I36.8, I36.9, I37.0, I37.1, I37.2, I37.8, I37.9,                                                                                                                                                                                                                                                                                                                                                                                                                                                                                                                                                                                                                                                                                                                                                                                                                                                                                                                                                                                                                                                                                                                                                                                                                                                                                                                                                                                                                                                                                                                                                                                                                                                                                                                                                                                                                                                                                                                                                                                                                                           |



|             |                                                                             |                                                           |
|-------------|-----------------------------------------------------------------------------|-----------------------------------------------------------|
|             | 746.3, 746.4, 746.5, 746.6,<br>V42.2, V43.3                                 | I38, I39, Q23.0, Q23.1, Q23.2, Q23.3, Z95.2, Z95.3, Z95.4 |
| Weight loss | 260, 261, 262, 263, 263.1, 263.2,<br>263.8, 263.9, 783.21, 783.22,<br>799.4 | E40, E41, E42, E43, E44.0, E44.1, E45, E46, R63.4, R64    |

**Supplementary Table 3. Other comorbidity diagnosis codes.**

|                                  | ICD-9                                                                                                                                                                                                                 | ICD-10                                                                                                                                                                                                                                                                                                                                                                                                                                                                                                                                                                                                                                                                                                                                                                                                                                                                                                                                                                                                                                                                                                                                                                                                                        |
|----------------------------------|-----------------------------------------------------------------------------------------------------------------------------------------------------------------------------------------------------------------------|-------------------------------------------------------------------------------------------------------------------------------------------------------------------------------------------------------------------------------------------------------------------------------------------------------------------------------------------------------------------------------------------------------------------------------------------------------------------------------------------------------------------------------------------------------------------------------------------------------------------------------------------------------------------------------------------------------------------------------------------------------------------------------------------------------------------------------------------------------------------------------------------------------------------------------------------------------------------------------------------------------------------------------------------------------------------------------------------------------------------------------------------------------------------------------------------------------------------------------|
| Critical limb ischaemia          | 440.22 440.23 440.24 785.4                                                                                                                                                                                            | E10.52 E10.621 E11.52 E11.621 I70.221 I70.222 I70.223 I70.228 I70.229 I70.231 I70.232 I70.233 I70.234 I70.235 I70.238 I70.239 I70.241 I70.242 I70.243 I70.244 I70.245 I70.248 I70.249 I70.261 I70.262 I70.263 I70.268 I70.269 I70.321 I70.322 I70.323 I70.328 I70.329 I70.331 I70.332 I70.333 I70.334 I70.335 I70.338 I70.339 I70.341 I70.342 I70.343 I70.344 I70.345 I70.348 I70.349 I70.361 I70.362 I70.363 I70.368 I70.369 I70.421 I70.422 I70.423 I70.428 I70.429 I70.431 I70.432 I70.433 I70.434 I70.435 I70.438 I70.439 I70.441 I70.442 I70.443 I70.444 I70.445 I70.448 I70.449 I70.461 I70.462 I70.463 I70.468 I70.469 I70.521 I70.522 I70.523 I70.528 I70.529 I70.531 I70.532 I70.533 I70.534 I70.535 I70.538 I70.539 I70.541 I70.542 I70.543 I70.544 I70.545 I70.548 I70.549 I70.561 I70.562 I70.563 I70.568 I70.569 I70.621 I70.622 I70.623 I70.628 I70.629 I70.631 I70.632 I70.633 I70.634 I70.635 I70.638 I70.639 I70.641 I70.642 I70.643 I70.644 I70.645 I70.648 I70.649 I70.661 I70.662 I70.663 I70.668 I70.669 I70.721 I70.722 I70.723 I70.728 I70.729 I70.731 I70.732 I70.733 I70.734 I70.735 I70.738 I70.739 I70.741 I70.742 I70.743 I70.744 I70.745 I70.748 I70.749 I70.761 I70.762 I70.763 I70.768 I70.769 |
| Dementia                         | 290.0 290.20 290.21 290.3 290.40 290.41 290.42 290.43 290.8 290.9 294.10 294.11 294.20 294.21 331.0 331.11 331.19                                                                                                     | F01.50 F01.51 F02.80 F02.81 F03.90 F03.91 G30.0 G30.1 G30.8 G30.9 G31.1                                                                                                                                                                                                                                                                                                                                                                                                                                                                                                                                                                                                                                                                                                                                                                                                                                                                                                                                                                                                                                                                                                                                                       |
| History of myocardial infarction | 410.00 410.01 410.02 410.10 410.11 410.12 410.20 410.21 410.22 410.30 410.31 410.32 410.40 410.41 410.42 410.50 410.51 410.52 410.60 410.61 410.62 410.70 410.71 410.72 410.80 410.81 410.82 410.90 410.91 410.92 412 | I21.01 I21.02 I21.09 I21.11 I21.19 I21.21 I21.29 I21.3 I21.4 I21.9 I21.A1 I21.A9 I25.2                                                                                                                                                                                                                                                                                                                                                                                                                                                                                                                                                                                                                                                                                                                                                                                                                                                                                                                                                                                                                                                                                                                                        |
| Intermittent claudication        | 440.21                                                                                                                                                                                                                | I70.211 I70.212 I70.213 I70.218 I70.219 I70.311 I70.312 I70.313 I70.318 I70.319 I70.411 I70.412 I70.413 I70.418 I70.419 I70.511 I70.512 I70.513 I70.518 I70.519 I70.611 I70.612 I70.613 I70.618 I70.619 I70.711 I70.712 I70.713 I70.718 I70.719                                                                                                                                                                                                                                                                                                                                                                                                                                                                                                                                                                                                                                                                                                                                                                                                                                                                                                                                                                               |
| Prior amputation                 | V49.70 V49.71 V49.72 V49.73 V49.74 V49.75 V49.76 V49.77                                                                                                                                                               | Z89.411 Z89.412 Z89.419 Z89.421 Z89.422 Z89.429 Z89.431 Z89.432 Z89.439 Z89.441 Z89.442 Z89.449 Z89.511 Z89.512 Z89.519 Z89.521 Z89.522 Z89.529 Z89.611 Z89.612 Z89.619 Z89.621 Z89.622 Z89.629                                                                                                                                                                                                                                                                                                                                                                                                                                                                                                                                                                                                                                                                                                                                                                                                                                                                                                                                                                                                                               |
| Other peripheral atherosclerosis | 440.20, 440.29, 440.30, 440.31, 440.32, 440.9                                                                                                                                                                         | I70.201, I70.202, I70.203, I70.208, I70.209 I70.291 I70.292 I70.293 I70.298 I70.299 I70.301 I70.302 I70.303 I70.308 I70.309 I70.391 I70.392 I70.393 I70.398 I70.399 I70.401 I70.402 I70.403 I70.408 I70.409 I70.491 I70.492 I70.493                                                                                                                                                                                                                                                                                                                                                                                                                                                                                                                                                                                                                                                                                                                                                                                                                                                                                                                                                                                           |

|             |                                                    |                                                                                                                                                                                                                                                                             |
|-------------|----------------------------------------------------|-----------------------------------------------------------------------------------------------------------------------------------------------------------------------------------------------------------------------------------------------------------------------------|
|             |                                                    | I70.498 I70.499 I70.501 I70.502 I70.503 I70.508 I70.509<br>I70.591 I70.592 I70.593 I70.598 I70.599 I70.601 I70.602<br>I70.603 I70.608 I70.609 I70.691 I70.692 I70.693 I70.698<br>I70.699 I70.701 I70.702 I70.703 I70.708 I70.709 I70.791<br>I70.792 I70.793 I70.798 I70.799 |
| Tobacco use | 305.1 649.00 649.01 649.02<br>649.03 649.04 V15.82 | F17.200 F17.201 F17.203 F17.208 F17.209 F17.210<br>F17.211 F17.213 F17.218 F17.219 F17.220 F17.221<br>F17.223F17.228 F17.229 F17.290 F17.291 F17.293<br>F17.298 F17.299 Z72.0 Z87.891                                                                                       |

**Supplementary Table 4. Prescription drug codes.**

| <b>ACE inhibitor or ARB use NDCs</b>                                                                                                                                                                                                                                                                                                                                                                                                                                                                                                                                                                                                                                                                                                                                                                                                                                                                                                                                                                                                                                                                                                                                                                                                                                                                                                                                                                                                                                                                                                                                                                                                                                                                                                                                                                                                                                                                                                                                                                                                                                                                                                                                                                                                                                                                                                                                                                                                                                                                                                                                                                                                                                                                                                                                                                                                                                                                                                                                                                                                                                                                                                                                                                                                                                                                                                                                                                                                                                                                                                                                                                                                                                                                                                                                                                                                                                                                                                                                                                                                                                                                                                                                                                                                                                                                                                                                                                                                                                                                                                            |
|-------------------------------------------------------------------------------------------------------------------------------------------------------------------------------------------------------------------------------------------------------------------------------------------------------------------------------------------------------------------------------------------------------------------------------------------------------------------------------------------------------------------------------------------------------------------------------------------------------------------------------------------------------------------------------------------------------------------------------------------------------------------------------------------------------------------------------------------------------------------------------------------------------------------------------------------------------------------------------------------------------------------------------------------------------------------------------------------------------------------------------------------------------------------------------------------------------------------------------------------------------------------------------------------------------------------------------------------------------------------------------------------------------------------------------------------------------------------------------------------------------------------------------------------------------------------------------------------------------------------------------------------------------------------------------------------------------------------------------------------------------------------------------------------------------------------------------------------------------------------------------------------------------------------------------------------------------------------------------------------------------------------------------------------------------------------------------------------------------------------------------------------------------------------------------------------------------------------------------------------------------------------------------------------------------------------------------------------------------------------------------------------------------------------------------------------------------------------------------------------------------------------------------------------------------------------------------------------------------------------------------------------------------------------------------------------------------------------------------------------------------------------------------------------------------------------------------------------------------------------------------------------------------------------------------------------------------------------------------------------------------------------------------------------------------------------------------------------------------------------------------------------------------------------------------------------------------------------------------------------------------------------------------------------------------------------------------------------------------------------------------------------------------------------------------------------------------------------------------------------------------------------------------------------------------------------------------------------------------------------------------------------------------------------------------------------------------------------------------------------------------------------------------------------------------------------------------------------------------------------------------------------------------------------------------------------------------------------------------------------------------------------------------------------------------------------------------------------------------------------------------------------------------------------------------------------------------------------------------------------------------------------------------------------------------------------------------------------------------------------------------------------------------------------------------------------------------------------------------------------------------------------------------------------------|
| 00071052723, 00071052740, 00071053023, 00071053040, 00071053223, 00071053240, 00071053523, 00247152530, 00247152559, 00247152590, 00247195530, 00247195560, 00247195590, 00247195630, 00247195660, 00247195690, 00247195730, 00247195760, 00247195790, 12280005990, 54569398400, 54569398401, 54569398500, 54569445400, 54868266500, 54868266501, 54868266601, 54868266602, 54868266603, 54868266604, 54868330700, 54868330701, 54868344500, 54868344501, 55289055230, 55289055330, 55289055430, 55289055530, 57866442001, 57866442101, 57866442301, 57866442401, 58864085930, 58864086330, 58864086930, 63629124001, 63629124201, 63874005810, 63874005815, 63874005830, 63874005890, 63874037910, 63874037930, 63874058110, 63874058130, 63874058190, 66105010109, 66105010209, 66105010309, 66105052409, 68115088990, 00032110101, 00032110201, 00032110301, 54868455200, 54868455201, 54868455500, 54868455501, 61894000102, 61894000202, 76234000001, 76234000101, 76234000201, 00039010310, 00039010311, 00039010410, 00039010411, 00039010510, 00039010511, 00039010610, 00247109030, 00247109060, 00247109103, 00247109130, 00247109160, 12280006100, 49999087130, 49999087190, 49999093430, 54569371300, 54569371400, 54569593600, 54868264400, 54868264401, 54868264402, 54868264500, 54868264501, 54868264503, 54868384600, 54868574700, 54868574701, 55289086730, 58864067430, 58864084730, 60793050001, 60793050101, 60793050201, 60793050301, 61570011001, 61570011056, 61570011101, 61570011105, 61570011156, 61570011201, 61570011205, 61570011256, 61570012001, 61570012005, 61570012080, 68115037830, 68115037860, 68115053000, 68115053030, 68115053060, 68115081200, 68115081230, 68115081260, 00186000431, 00186000831, 00186001628, 00186001631, 00186001654, 00186003228, 00186003231, 00186003254, 35356042730, 49999030530, 49999098830, 54569471400, 54569471900, 54569471901, 54868441300, 54868461200, 54868548900, 54868559100, 61113000431, 61113000831, 61113001628, 61113001631, 61113003228, 61113003231, 62559064030, 62559064130, 62559064230, 62559064290, 62559064330, 62559064390, 00024585030, 00024585090, 00024585130, 00024585190, 00024585230, 00024585290, 00087277115, 00087277131, 00087277132, 00087277135, 00087277215, 00087277231, 00087277232, 00087277235, 00087277315, 00087277331, 00087277332, 00087277335, 12280006330, 12280006390, 12280036930, 12280036990, 13411010601, 13411010603, 13411010606, 13411010609, 13411010615, 13411010701, 13411010703, 13411010706, 13411010709, 13411010715, 35356013130, 35356042830, 54569457200, 54569489500, 54569586700, 54868419900, 54868419901, 54868419902, 54868441400, 55887010230, 55887010330, 55887010530, 58864072615, 58864072630, 58864077115, 63874064710, 63874064714, 63874064730, 66105050301, 66105050303, 66105050306, 66105050309, 66105050315, 66105050401, 66105050403, 66105050406, 66105050409, 66105050415, 67544040045, 00093512401, 00093512501, 00093512505, 00093512601, 00093512605, 00093512701, 00172535060, 00172535070, 00172535110, 00172535160, 00172535170, 00172535180, 00172535210, 00172535260, 00172535270, 00172535280, 00172535310, 00172535360, 00172535370, 00172535380, 00185004801, 00185004805, 00185005301, 00185005305, 00185050501, 00185050505, 00185080801, 00185080805, 00185082001, 00185082005, 00247213630, 00247213660, 00247213730, 00247215130, 00247215160, 00378044101, 00378044301, 00378044401, 00378044701, 00781189101, 00781189201, 00781189301, 00781189401, 00904618940, 00904619040, 00904619140, 00904619240, 13811062710, 13811062810, 13811062850, 13811062910, 13811062950, 13811063010, 13811063050, 21695032630, 21695032730, 21695087730, 23490511801, 23490511901, 23490512003, 23490512009, 23490512101, 23629000801, 23629008001, 33358004830, 33358004930, 42291016001, 42291016050, 42291016090, 42291016101, 42291016150, 42291016190, 42291016201, 42291016218, 42291016250, 42291016290, 42291016301, 42291016318, 42291016350, 42291016390, 43063013130, 43063013230, 43063028830, 43063028890, 43063040330, 43063074830, 43063078730, 43547033510, 43547033610, 43547033650, 43547033710, 43547033750, 43547033810, 43547033850, 49999075930, 50268010915, 50268011015, 50268011115, 50268011215, 51079014520, 51079014620, 52959083130, 52959083530, 52959083560, 52959084130, 52959084160, 52989083530, 54458086210, 54458089310, 54458095610, 54458095710, 54569566800, 54569566801, 54569566802, 54569566900, 54569566901, 54569567000, 54569567001, |

54868500100, 54868500101, 54868507900, 54868507901, 54868520400, 55045316400, 55289096330, 55887022330, 55887022390, 55887032230, 55887032260, 55887032290, 55887032292, 55887038530, 55887038590, 55887087530, 58177034104, 58177034204, 58177034208, 58177034304, 58177034308, 58177034404, 58177034408, 59762314601, 59762314602, 59762314701, 59762314702, 59762314801, 59762314802, 60429015890, 60429015990, 60429016001, 60429016005, 60429016018, 60429016090, 60505026501, 60505026601, 60505026605, 60505026701, 60505026705, 60505026801, 60505026805, 62037051601, 62037051701, 62037051801, 62037051901, 63304033701, 63304033801, 63304033805, 63304033901, 63304033905, 63304034001, 63304034005, 63304073600, 63304073601, 63304073605, 63304073690, 63304073701, 63304073705, 63304073790, 63304073801, 63304073805, 63304073890, 63304073901, 63304073905, 63304073990, 63629172801, 63629267201, 63629292301, 65162075110, 65162075150, 65162075210, 65162075250, 65162075310, 65162075350, 65162075410, 65162075450, 65862011601, 65862011701, 65862011801, 66336012430, 66336023230, 66336069130, 66336077330, 66636069130, 68084073925, 68115021300, 68115049060, 68115059700, 68115061500, 68115062100, 68115065400, 00247228530, 00247228560, 00247228590, 00247228630, 00247228660, 00247228690, 00247228730, 00247228760, 00247228790, 12280016830, 12280016890, 12280037530, 12280037590, 35356021630, 35356021690, 35356028730, 49999081530, 49999081590, 54569560600, 54868488500, 54868488501, 54868498600, 54868498601, 54868498602, 55289043630, 58016005300, 58016005330, 58016005360, 58016005390, 58016006600, 58016006630, 58016006660, 58016006690, 58597010130, 65597010303, 65597010310, 65597010330, 65597010390, 65597010403, 65597010410, 65597010430, 65597010490, 00781593631, 00781593731, 00781593831, 00781593892, 00781593931, 00781593992, 33342011407, 33342011507, 33342011607, 33342011610, 33342011707, 33342011710, 49884065809, 49884065909, 49884066009, 49884066109, 60505361803, 60505361903, 60505362003, 60505362009, 60505362103, 60505362109, 60687011925, 60687013025, 60687024125, 62332006030, 62332006090, 68084087725, 00003045006, 00003045051, 00003045054, 00003045075, 00003045239, 00003045250, 00003045251, 00003045275, 00003048206, 00003048250, 00003048251, 00003048275, 00003048550, 00003048551, 00247122200, 00247138114, 00247138130, 00247138160, 00247138190, 49884079301, 49884079374, 49884079401, 49884079410, 49884079474, 49884079501, 49884079510, 49884079574, 49884079601, 51655097524, 54569052200, 54569052201, 54569052203, 54569052300, 54569052302, 54868066901, 54868066902, 54868066903, 54868066905, 54868066906, 54868141501, 54868177501, 54868177504, 55289050630, 55289050697, 00047052224, 00047052232, 00047054224, 00047054232, 00047054324, 00047055924, 00047055932, 00093009101, 00093009110, 00093009201, 00093009210, 00093009701, 00093009710, 00093009801, 00093813201, 00093813210, 00093813301, 00093813310, 00093813401, 00093813410, 00093813501, 00143117101, 00143117110, 00143117125, 00143117201, 00143117210, 00143117225, 00143117301, 00143117310, 00143117325, 00143117401, 00143117425, 00182262201, 00182262205, 00182262210, 00182262301, 00182262305, 00182262310, 00182262389, 00182262401, 00182262405, 00182262410, 00182262501, 00185003101, 00185003110, 00185006101, 00185006110, 00185047101, 00185047110, 00185059101, 00185059105, 00185059110, 00247163530, 00247163600, 00247163601, 00247163614, 00247163630, 00247163660, 00247163690, 00247163699, 00247163700, 00247163730, 00247163760, 00364262801, 00364262802, 00364262805, 00364262901, 00364262902, 00364262905, 00364263001, 00364263002, 00364263005, 00364263101, 00378300701, 00378300710, 00378301201, 00378301210, 00378301701, 00378301710, 00378302201, 00440723160, 00440723260, 00536347101, 00536347105, 00536347201, 00536347210, 00536347301, 00536347305, 00536347401, 00536427201, 00536427205, 00536427301, 00536427401, 00536427405, 00536427501, 00603255521, 00603255532, 00603255621, 00603255632, 00603255721, 00603255732, 00603255821, 00615451953, 00615451963, 00615452053, 00615452063, 00615452143, 00615452153, 00615452163, 00615452165, 00677159201, 00677159210, 00677159301, 00677159310, 00677159401, 00677159410, 00677159501, 00781182801, 00781182810, 00781182901, 00781182910, 00781183801, 00781183810, 00781183901, 00781805201, 00781805210, 00781806101, 00781806110, 00781807501, 00781807510, 00781808001, 00839799406, 00839799412, 00839799416, 00839799506, 00839799512, 00839799516, 00839799606, 00839799612, 00839799616, 00839806406, 00839806416, 00904504560, 00904504561, 00904504567, 00904504580, 00904504660, 00904504661, 00904504680, 00904504740, 00904504760,

00904504761, 00904504780, 00904504860, 11845112001, 11845112004, 11845112101, 11845112104, 11845112201, 11845112204, 11845112301, 21695047730, 21695047830, 23490519101, 23490519201, 23490519301, 23490519302, 23490519303, 23490519400, 23490519401, 23490519402, 38245031210, 38245031220, 38245047110, 38245047120, 38245065310, 38245074310, 38245074320, 43063014630, 49452168101, 49452168102, 49452168103, 49884044401, 49884044410, 49884044501, 49884044510, 49884044601, 49884044610, 49884044701, 49884061901, 49884061910, 49884062001, 49884062010, 49884062101, 49884062110, 49884062201, 49999010500, 49999010510, 49999010530, 49999010560, 49999051130, 49999051160, 51079086320, 51079086420, 51285095002, 51285095005, 51285095102, 51285095105, 51285095202, 51285095205, 51285095302, 51285095602, 51285095605, 51285095702, 51285095705, 51285095802, 51875034801, 51875034802, 51875034804, 51875034901, 51875034902, 51875034904, 51875035001, 51875035002, 51875035501, 51875035502, 51875035504, 51875095502, 51875095505, 52544068801, 52544068805, 52544068810, 52544068901, 52544068905, 52544068910, 52544069001, 52544069005, 52544069010, 52544069101, 52555063701, 52555063710, 52555063801, 52555063810, 52555063901, 52555063910, 52555064001, 54569424600, 54569424601, 54569424603, 54569424604, 54569424605, 54569424607, 54569424700, 54569424702, 54569424703, 54569459300, 54569459301, 54569459303, 54868372301, 54868372401, 54868372402, 54868372403, 54868372501, 54868372502, 54868519600, 54868519602, 55045237600, 55289021230, 55289021290, 55289034430, 55289034490, 55289034497, 55370014207, 55370014209, 55370014407, 55370014409, 55370014507, 55370016407, 55370016409, 55887043030, 55887058201, 55887058230, 55887098730, 55953013240, 55953013270, 55953013280, 55953013340, 55953013370, 55953013380, 55953013440, 55953013470, 55953013480, 55953013540, 55953013570, 55953013580, 57480083801, 57480083806, 57480083901, 57480083906, 57480084001, 57480084006, 57480084101, 57866610301, 57866610302, 57866610303, 57866610304, 57866610601, 57866610602, 57866610603, 57866610604, 58864006628, 59772704501, 59772704503, 59772704504, 59772704505, 59772704506, 59772704507, 59772704601, 59772704602, 59772704603, 59772704604, 59772704605, 59772704606, 59772704701, 59772704703, 59772704704, 59772704705, 59772704801, 59911583201, 59911583202, 59911583301, 59911583302, 59911583401, 59911583402, 59911583501, 59930165501, 59930165502, 59930165503, 59930165601, 59930165602, 59930165603, 59930165701, 59930165702, 59930165703, 59930165801, 59930165802, 59930165803, 60429002901, 60429002910, 60429002990, 60429003001, 60429003010, 60429003012, 60429003027, 60429003060, 60429003090, 60429003101, 60429003110, 60429003112, 60429003127, 60429003130, 60429003160, 60429003190, 60429025701, 60505000306, 60505000309, 60505000406, 60505000409, 60505000506, 60505000509, 60505000606, 60505000609, 60687030421, 60687031521, 60763101100, 60763101102, 60763101200, 60763101202, 60763101300, 60951072170, 60951072190, 60951072270, 60951072290, 60951072470, 60951072490, 60951072770, 60951072790, 62033010120, 63629133801, 63629170601, 63629254101, 63739004201, 63739004203, 63739004210, 63739004215, 63739004301, 63739004303, 63739004310, 63739004315, 63874034701, 63874034702, 63874034705, 63874034720, 63874034730, 63874034740, 63874034742, 63874034745, 63874034790, 63874034801, 63874034810, 63874034814, 63874034820, 63874034830, 63874034860, 63874034890, 64679090201, 64679090202, 64679090205, 64679090301, 64679090302, 64679090305, 64679090401, 64679090402, 64679090405, 64679090501, 64679090504, 66336061860, 66336075060, 66336075090, 66336079460, 66336094630, 66336094660, 66336094690, 68115005900, 68115005930, 68115005990, 68115006030, 68115006090, 68115042590, 68645016059, 68645016159, 68645016259, 68645016359, 00006095128, 00006095154, 00006095158, 00006095182, 00006095187, 00006095228, 00006095231, 00006095254, 00006095258, 00006095282, 00006095287, 00006096028, 00006096031, 00006096054, 00006096058, 00006096082, 00006096086, 00247233530, 00247233560, 00247233590, 12280000590, 12280006630, 16590006330, 43353045945, 49999094030, 49999094090, 49999099190, 54569443700, 54569443800, 54868233500, 54868233501, 54868372600, 54868372601, 54868372602, 54868507700, 55045340108, 55289023830, 55887043230, 55887043260, 55887043290, 58864066230, 58864080730, 63629133701, 63629291201, 63874063701, 63874063710, 63874063720, 63874063730, 63874063790, 66105055210, 66105055303, 66105055310, 67544038230, 68115073300, 68115073330, 68115073390, 00078035805, 00078035806, 00078035833, 00078035834, 00078035905, 00078035906, 00078035917, 00078035934, 00078036005,

00078036006, 00078036011, 00078036034, 00078037606, 00078037615, 00078042306, 00078042315, 00083400001, 00083400041, 00083400061, 00083400101, 00083400141, 00083400161, 00247196200, 00247196230, 00247225790, 12280000890, 12280037890, 13411014201, 13411014202, 13411014203, 13411014206, 13411014209, 13411014301, 13411014302, 13411014303, 13411014306, 13411014309, 35356010190, 49999054330, 49999087700, 49999087730, 49999087790, 49999087800, 49999087830, 49999087890, 52959075630, 54569469700, 54569469800, 54569536100, 54569536200, 54569566600, 54868417800, 54868440600, 54868464500, 54868464501, 54868464502, 54868465200, 54868465201, 54868465202, 54868465203, 54868597700, 55045340909, 55289081730, 55289082530, 55289087630, 55887030730, 58864060530, 58864068130, 66336016930, 66336038730, 68115085400, 68115085490, 60631004030, 60631008030, 64764084430, 64764088430, 00093002601, 00093002610, 00093002701, 00093002710, 00093002750, 00093002801, 00093002810, 00093002850, 00093002901, 00093002910, 00093002950, 00172419510, 00172419560, 00172419580, 00172419585, 00172419610, 00172419660, 00172419680, 00172419685, 00172419710, 00172419760, 00172419780, 00172419785, 00172419810, 00172419860, 00172419870, 00172419880, 00185011401, 00185011410, 00185011450, 00185012701, 00185012710, 00185012750, 00185014701, 00185014710, 00185014750, 00185021401, 00185021410, 00185021450, 00228265811, 00228265896, 00228265911, 00228265996, 00228266011, 00228266096, 00228266111, 00228266196, 00247188102, 00247188105, 00247188130, 00247188160, 00247188230, 00247188260, 00247188299, 00247215530, 00247215560, 00247215590, 00247230630, 00247230660, 00247230690, 00364269801, 00364269802, 00364270101, 00364270102, 00364272701, 00364272702, 00364273401, 00364273402, 00378105101, 00378105105, 00378105201, 00378105210, 00378105301, 00378105310, 00378105401, 00378105405, 00591066801, 00591066805, 00591066901, 00591066905, 00591067001, 00591067005, 00591067101, 00591067105, 00591067110, 00781122901, 00781122910, 00781122913, 00781123101, 00781123110, 00781123113, 00781123201, 00781123210, 00781123213, 00781123301, 00781123310, 00781544101, 00781544110, 00781544201, 00781544210, 00781544301, 00781544310, 00781544401, 00781544410, 00904550260, 00904550261, 00904550280, 00904550360, 00904550460, 00904560960, 00904560961, 00904561060, 00904561061, 00904561161, 15338020030, 15338021130, 15338022030, 15338023330, 16714044201, 16714044202, 16714044301, 16714044302, 16714044401, 16714044402, 16714044501, 16714044502, 21695048730, 21695048830, 21695048990, 23490549101, 23490549102, 23490549108, 23490549109, 23490549201, 23490549202, 23490549401, 23490549402, 33358012730, 35356054130, 38779051404, 38779051405, 49158050101, 49158050201, 49158050210, 49158050301, 49884059101, 49884059110, 49884059201, 49884059210, 49884059301, 49884059310, 49884059401, 49884059410, 49999023900, 49999023930, 49999023960, 49999024000, 49999024030, 49999034500, 49999034530, 50111089101, 50111089103, 50111089201, 50111089203, 50111089301, 50111089303, 50111089401, 50111089403, 51079095020, 51079095120, 51079095220, 51079095320, 51655027924, 51655062024, 51655063624, 51655063625, 51672403701, 51672403703, 51672403801, 51672403803, 51672403901, 51672403903, 51672404001, 51672404003, 51927333600, 52544066801, 52544066805, 52544066901, 52544066905, 52544067001, 52544067005, 52544067101, 52959094230, 54569513300, 54569513301, 54569513400, 54569513401, 54569513402, 54569513500, 54569513501, 54868433100, 54868433101, 54868433102, 54868433200, 54868433201, 54868433202, 54868435700, 54868435701, 54868435702, 54868435703, 54868435800, 54868435801, 54868435802, 55045279900, 55045279901, 55045279902, 55045279906, 55045279909, 55045282700, 55045282704, 55045282706, 55045282708, 55045282709, 55045283208, 55289059130, 55289059190, 55289069410, 55289069430, 55289069490, 55289098430, 55289098490, 55887009930, 55887022730, 55887022760, 55887055830, 55887055860, 55887055890, 55887059601, 55887059630, 55887059660, 55887059690, 55887061201, 55887061230, 55887061260, 55887061290, 55887061292, 55887098430, 57866685901, 57866685902, 57866685903, 57866685904, 58016057900, 58016057920, 58016057930, 58016057960, 58016058000, 58016058020, 58016058030, 58016058060, 58016058100, 58016058120, 58016058130, 58016058160, 58864075430, 58864075530, 58864076230, 59772554101, 59772554103, 59772554201, 59772554203, 59772554301, 59772554303, 59772554401, 59772554403, 60429007101, 60429007105, 60429007110, 60429007127, 60429007130, 60429007160, 60429007190, 60429007201, 60429007205, 60429007210, 60429007227, 60429007230,

60429007260, 60429007290, 60429007301, 60429007305, 60429007310, 60429007327, 60429007330, 60429007360, 60429007390, 60429007401, 60429007405, 60429007410, 60429007427, 60429007430, 60429007460, 60429007490, 60429018310, 60429018330, 60429018390, 60429018410, 60429018430, 60429018490, 60429018510, 60429018530, 60429018590, 60429018610, 60429018630, 60429018690, 60505004907, 60505004909, 60505005007, 60505005009, 60505005107, 60505005109, 60505005207, 60505005209, 63304052201, 63304052210, 63304052301, 63304052310, 63304052401, 63304052410, 63304052501, 63304052510, 63304083401, 63304083410, 63304083501, 63304083510, 63304083601, 63304083610, 63304083701, 63304083710, 63629152201, 63629152202, 63629152203, 63629152501, 63629152502, 63629152503, 63629152601, 63629152602, 63739030210, 63739030215, 63739032205, 63739032210, 63739032215, 63739032310, 63739032315, 63874042301, 63874042307, 63874042310, 63874042314, 63874042320, 63874042330, 63874042360, 63874065501, 63874065510, 63874065520, 63874065530, 63874065560, 63874098701, 63874098710, 63874098714, 63874098720, 63874098730, 63874098760, 64679092302, 64679092303, 64679092309, 64679092310, 64679092402, 64679092403, 64679092409, 64679092410, 64679092501, 64679092502, 64679092503, 64679092509, 64679092510, 64679092602, 64679092603, 64679092609, 64679092610, 66267032330, 66267032360, 66267032390, 66267041390, 66267041392, 66267100900, 66336038930, 66336038960, 66336039130, 66336039160, 66336039330, 66336039360, 66685030100, 66685030102, 66685030200, 66685030202, 66685030300, 66685030302, 66685030400, 66685030402, 67544035080, 68084039001, 68084039101, 68084039201, 68115012700, 68115012715, 68115012730, 68115012760, 68115012800, 68115012820, 68115012830, 68115012860, 68115012890, 68115012930, 68115012960, 68645045490, 68645045590, 68645045690, 68645045790, 68682071001, 68682071010, 68682071030, 68682071090, 68682071101, 68682071110, 68682071130, 68682071190, 68682071201, 68682071210, 68682071230, 68682071290, 68682071301, 68682071310, 68682071330, 68682071390, 00074210931, 00074212201, 00074212202, 00143978610, 00143978710, 00409212201, 00409212202, 00409212213, 00409212288, 00703840101, 00703840104, 00703841101, 00703841104, 10019009203, 10019009204, 10019009503, 10019009504, 55390001010, 55390001110, 61703023716, 61703023744, 52652100101, 52652400101, 00378662993, 00093722210, 00093722298, 00093722310, 00093722398, 00093722410, 00093722498, 00185004109, 00185004110, 00185004209, 00185004210, 00185004709, 00185004710, 00247205830, 00247217130, 00247230530, 00247230560, 00247230590, 00781508310, 00781508392, 00781508410, 00781508492, 00781508592, 23629002201, 24658010010, 24658010090, 24658010110, 24658010190, 24658010210, 24658010290, 31722020090, 31722020110, 31722020190, 31722020210, 31722020290, 43547038609, 43547038611, 43547038709, 43547038711, 43547038809, 43547038811, 54569562100, 54569609800, 54868505500, 54868506400, 54868506401, 54868518200, 54868518201, 54868518202, 55887030430, 55887030460, 55887030490, 57866027401, 57866027502, 57866313801, 60429075510, 60429075545, 60429075590, 60429075610, 60429075618, 60429075645, 60429075690, 60429075710, 60429075718, 60429075745, 60429075790, 60505251002, 60505251004, 60505251102, 60505251104, 60505251202, 60505251208, 62037093590, 62037093690, 62037093790, 63304077510, 63304077590, 63304077610, 63304077690, 63304077710, 63304077790, 65862047190, 65862047290, 65862047390, 67544030630, 67544031130, 67544032215, 67544038030, 67544043115, 67544045415, 67544048915, 68462036710, 68462036790, 68462036810, 68462036890, 68462036910, 68462036990, 68505251002, 68505251004, 68552022110, 68552022190, 68552022210, 68552022290, 68552022310, 68552022390, 69097085605, 69097085705, 69097085805, 76282020010, 76282020090, 76282020110, 76282020190, 76282020210, 76282020290, 00054025013, 00054025022, 00054025113, 00054025122, 00054025213, 00054025222, 00093746456, 00093746498, 00093746505, 00093746556, 00093746598, 00093746605, 00093746656, 00093746698, 00093751405, 00093751456, 00093751498, 00378202205, 00378202277, 00378202305, 00378202377, 00378202393, 00378202405, 00378202477, 00378202493, 00591278219, 00591278230, 00591278319, 00591278330, 00591278419, 00591278430, 00603408002, 00603408016, 00603408102, 00603408116, 00603408128, 00603408202, 00603408216, 00603408228, 00955104030, 00955104090, 00955104130, 00955104190, 00955104230, 00955104290, 31722016005, 31722016110, 31722016205, 31722072930, 31722072990, 31722073030, 31722073090, 31722073130, 31722073190, 33342004707, 33342004710,



33342004807, 33342004810, 33342004907, 33342004910, 42291035690, 42291035790, 42658012101, 42658012104, 42658012201, 42658012204, 42658012301, 42658012304, 43547027703, 43547027709, 43547027750, 43547027803, 43547027809, 43547027850, 43547027903, 43547027909, 43547027950, 43547037403, 43547037409, 43547037450, 43547037503, 43547037509, 43547037550, 43547037603, 43547037609, 43547037650, 50268044015, 50268044115, 50268044215, 54569630900, 59746044730, 59746044790, 59746044830, 59746044890, 59746044930, 59746044990, 60429064030, 60429064090, 60429064130, 60429064190, 60429064230, 60429064290, 60505354703, 60505354709, 60505354803, 60505354805, 60505354809, 60505354903, 60505354905, 60505354909, 62332004130, 62332004190, 62332004230, 62332004271, 62332004290, 62332004330, 62332004371, 62332004390, 65682063805, 65682063830, 65682063890, 65862063730, 65862063790, 65862063805, 65862063830, 65862063890, 65862063905, 65862063930, 65862063990, 68084000721, 68084021721, 68084064421, 68180041006, 68180041009, 68180041106, 68180041109, 68180041206, 68180041209, 68645040470, 69367011901, 69367011903, 69367012001, 69367012003, 69367012101, 69367012103, 00093111101, 00093111201, 00093111210, 00093111301, 00093111310, 00093111401, 00093111410, 00093111501, 00093111505, 00093515701, 00143126501, 00143126509, 00143126510, 00143126601, 00143126609, 00143126610, 00143126630, 00143126645, 00143126701, 00143126709, 00143126710, 00143126718, 00143126730, 00143126745, 00143126801, 00143126809, 00143126810, 00143126818, 00143126830, 00143126845, 00143127001, 00143127009, 00143127010, 00143127018, 00143127030, 00143127045, 00143128001, 00143128010, 00143971301, 00143971310, 00143971401, 00143971410, 00143971501, 00143971510, 00172375710, 00172375760, 00172375770, 00172375810, 00172375860, 00172375870, 00172375880, 00172375910, 00172375960, 00172375970, 00172375980, 00172376010, 00172376060, 00172376070, 00172376080, 00172376110, 00172376160, 00172376170, 00172376180, 00172376210, 00172376260, 00172376270, 00185002501, 00185002510, 00185010101, 00185010110, 00185010133, 00185010201, 00185010210, 00185010233, 00185010301, 00185010310, 00185010401, 00185010410, 00185060201, 00185060210, 00185060501, 00185060510, 00185061001, 00185061010, 00185062001, 00185062010, 00185063001, 00185063010, 00185064001, 00185064010, 00185540001, 00185540010, 00247200106, 00247200130, 00247202100, 00247202130, 00247202160, 00247223700, 00247223730, 00247231830, 00247231860, 00247231890, 00378207201, 00378207301, 00378207310, 00378207401, 00378207410, 00378207501, 00378207510, 00378207601, 00378207605, 00378207701, 00440767490, 00440767590, 00440767690, 00591040501, 00591040505, 00591040601, 00591040610, 00591040701, 00591040710, 00591040801, 00591040810, 00591040901, 00591040905, 00591040975, 00591088501, 00603420921, 00603420928, 00603421002, 00603421016, 00603421021, 00603421028, 00603421030, 00603421032, 00603421060, 00603421102, 00603421121, 00603421128, 00603421132, 00603421134, 00603421160, 00603421202, 00603421221, 00603421228, 00603421232, 00603421234, 00603421260, 00603421321, 00603421328, 00603421402, 00603421404, 00603421421, 00603421428, 00603421430, 00603421432, 00603421460, 00781166501, 00781166601, 00781166701, 00781166792, 00781166801, 00781166892, 00781166901, 00781167301, 00904563843, 00904563846, 00904563861, 00904563889, 00904563943, 00904563946, 00904563948, 00904563961, 00904563989, 00904563993, 00904564043, 00904564046, 00904564048, 00904564061, 00904564089, 00904564093, 00904564243, 00904564246, 00904564248, 00904564252, 00904564261, 00904564289, 00904564293, 00904577889, 00904580843, 00904580846, 00904580848, 00904580861, 00904580880, 00904580889, 00904580893, 00904580943, 00904580946, 00904580948, 00904580961, 00904580980, 00904580989, 00904580993, 00904581043, 00904581046, 00904581048, 00904581052, 00904581061, 00904581080, 00904581089, 00904581093, 00904581143, 00904581146, 00904581161, 00904581180, 00904581189, 00904581240, 00904581289, 00904648480, 00904648561, 00904648580, 00904648661, 00904648680, 00904648761, 00904648780, 00904679761, 00904679861, 00904679961, 00904680061, 12280012960, 12280014400, 16729019401, 16729019501, 16729019517, 16729019601, 16729019617, 16729019701, 16729019717, 16729019801, 16729019817, 16729019901, 16729019917, 16729037501, 16729037617, 16729037717, 16729037817, 16729037901, 16729037917, 16729038001, 16729038017, 18837027730, 21695032830, 21695032930, 21695032990, 21695033020, 21695033030, 21695033090, 21695033130, 23490581500, 23490581501, 23490581601, 23490581602, 23490581606, 23490581702, 23490581802, 23490581902, 24658024010, 24658024090,

24658024110, 24658024130, 24658024145, 24658024190, 24658024210, 24658024215, 24658024218, 24658024230, 24658024245, 24658024290, 24658024310, 24658024315, 24658024318, 24658024330, 24658024345, 24658024390, 24658024401, 24658024410, 24658024510, 24658024515, 24658024518, 24658024530, 24658024545, 24658024560, 24658024590, 31722041801, 31722041810, 31722041901, 31722041910, 31722042001, 31722042010, 31722042101, 31722042110, 31722042201, 31722042210, 33358021130, 33358021230, 33358021330, 33458021130, 43063000701, 43063000714, 43063000730, 43063000760, 43063000790, 43063000798, 43063003201, 43063007430, 43063007490, 43063013890, 43063041401, 43063041490, 43063048590, 43063052530, 43063052590, 43063076912, 43063076930, 43063076993, 43063078614, 43063078630, 43063078660, 43063078690, 43063078693, 43063078698, 43063080030, 43063080090, 43063081130, 43063081190, 43063081212, 43063081214, 43063081230, 43063081260, 43063081290, 43063081293, 43063081298, 43063081314, 43063081330, 43063081360, 43063081390, 43063081393, 43063081398, 43063081530, 43063081560, 43063081590, 43353035030, 43353036515, 43353041160, 43353048845, 43547035110, 43547035150, 43547035210, 43547035211, 43547035310, 43547035311, 43547035410, 43547035411, 43547035510, 43547035550, 43547035610, 43547035611, 43547041410, 43547041450, 43547041510, 43547041511, 43547041610, 43547041611, 43547041710, 43547041711, 43547041810, 43547041850, 43547041910, 43547041911, 49884055610, 49884055610, 49884055701, 49884055710, 49884055801, 49884055810, 49884055901, 49884055910, 49884056001, 49884056010, 49884063501, 49884063510, 49999018210, 49999018230, 49999018260, 49999018310, 49999018330, 49999018360, 49999029500, 49999029510, 49999029530, 49999046910, 49999046930, 49999087000, 51079025640, 51079026140, 51079098110, 51079098120, 51079098140, 51079098156, 51079098157, 51079098160, 51079098219, 51079098220, 51079098240, 51079098256, 51079098257, 51079098260, 51079098319, 51079098320, 51079098340, 51079098356, 51079098357, 51079098360, 51079098420, 51079098440, 51079098450, 51655023124, 51655024424, 51655028024, 51655029224, 52959072815, 52959072820, 52959072830, 52959072930, 52959072960, 52959072990, 52959075300, 52959075330, 52959075360, 52959085420, 52959085430, 54458090602, 54458099410, 54458099510, 54458099610, 54458099710, 54458099809, 54458099909, 54458099910, 54569543400, 54569543403, 54569543404, 54569543405, 54569543500, 54569543503, 54569543504, 54569543505, 54569543700, 54569543702, 54569543800, 54569543803, 54569547200, 54569547202, 54569572800, 54868464600, 54868464601, 54868464602, 54868464603, 54868465600, 54868465601, 54868465700, 54868465701, 54868465702, 54868465703, 54868465704, 54868465800, 54868465801, 54868465802, 54868465803, 54868467800, 54868467801, 54868478000, 54868478001, 55045292900, 55045292906, 55045292908, 55045293600, 55045293608, 55045293700, 55045293800, 55045293808, 55045297500, 55045297506, 55045297508, 55045305900, 55045305908, 55045377208, 55289063801, 55289063812, 55289063814, 55289063830, 55289063860, 55289063890, 55289063898, 55289069614, 55289069630, 55289069660, 55289069690, 55289069698, 55289088430, 55289088490, 55289091730, 55289091790, 55887056930, 55887056960, 55887056990, 55887058101, 55887058130, 55887058160, 55887058190, 55887058930, 55887058990, 55887059030, 55887059060, 55887059090, 55887059101, 55887059110, 55887059120, 55887059130, 55887059160, 55887059190, 57237005200, 57237005205, 57237005300, 57237005399, 57237005400, 57237005499, 57237005500, 57237005599, 57237005600, 57237005700, 57237005799, 57866200001, 57866400001, 57866500001, 57866870001, 58016006900, 58016006930, 58016006960, 58016096330, 58016096360, 58016096390, 58016099800, 58016099830, 58016099860, 58016099890, 58864000630, 58864060315, 58864060330, 58864060390, 58864061815, 58864061830, 58864075030, 58864075330, 58864075390, 59762227001, 59762227003, 59762227007, 59762227101, 59762227103, 59762227107, 59762227201, 59762227203, 59762227207, 59762227301, 59762227303, 59762227307, 59762227401, 59762227403, 59762227407, 59762227501, 59762227503, 59762227507, 60429020601, 60429020605, 60429020701, 60429020710, 60429020730, 60429020745, 60429020790, 60429020801, 60429020810, 60429020830, 60429020845, 60429020850, 60429020890, 60429020901, 60429020910, 60429020915, 60429020918, 60429020930, 60429020945, 60429020950, 60429020990, 60429021101, 60429021105, 60429021201, 60429021210, 60429021218, 60429021230, 60429021245, 60429021260, 60429021290, 60429072801, 60429072810, 60429072830, 60429072890, 60429072901, 60429072910,

60429072945, 60429072990, 60429073001, 60429073010, 60429073030, 60429073045, 60429073090, 60429073101, 60429073110, 60429073130, 60429073145, 60429073190, 60429073210, 60429073230, 60429073290, 60429073301, 60429073310, 60429073330, 60429073345, 60429073390, 60505018400, 60505018401, 60505018500, 60505018501, 60505018507, 60505018509, 60505018600, 60505018601, 60505018607, 60505018609, 60505018700, 60505018701, 60505018707, 60505018709, 60505018800, 60505018801, 60505018809, 60505018900, 60505018901, 60505018908, 60505018909, 60505268301, 60505268401, 60505268408, 60505268409, 60505268501, 60505268508, 60505268509, 60505268601, 60505268608, 60505268609, 60505268801, 60505268808, 60505268809, 60687017725, 60687032501, 60687033301, 63304053101, 63304053201, 63304053210, 63304053301, 63304053310, 63304053401, 63304053410, 63304053501, 63304053510, 63304059901, 63629268801, 63629290801, 63629290802, 63629290803, 63629293501, 63739034810, 63739034815, 63739034910, 63739034915, 63739034943, 63739035010, 63739035015, 63739035043, 63874051401, 63874051410, 63874051414, 63874051415, 63874051416, 63874051420, 63874051428, 63874051430, 63874051460, 63874051490, 63874052201, 63874052215, 63874052230, 63874052260, 63874055801, 63874055810, 63874055814, 63874055816, 63874055828, 63874055830, 63874055860, 63874055890, 63874111409, 64679092701, 64679092702, 64679092705, 64679092709, 64679092801, 64679092805, 64679092806, 64679092810, 64679092901, 64679092905, 64679092906, 64679092910, 64679094101, 64679094105, 64679094106, 64679094110, 64679094201, 64679094202, 64679094205, 64679094209, 64679095301, 64679095302, 64679095305, 64679095309, 65243030303, 65243031403, 65862003701, 65862003705, 65862003799, 65862003801, 65862003805, 65862003899, 65862003901, 65862003905, 65862003999, 65862004001, 65862004005, 65862004099, 65862004101, 65862004105, 65862004199, 65862004201, 65862004205, 65862004299, 66336074130, 66336086730, 66336097230, 66685070101, 66685070102, 66685070201, 66685070202, 66685070203, 66685070301, 66685070302, 66685070303, 66685070401, 66685070402, 66685070403, 66685070501, 66685070502, 66685070601, 66685070603, 66685070604, 67544006230, 67544012815, 67544013415, 67544014815, 67544015915, 67544017330, 67544017430, 67544021915, 67544099730, 67544099960, 68001020700, 68001020708, 68001020800, 68001020808, 68001020900, 68001020908, 68001021000, 68001021008, 68001021100, 68001021108, 68001021200, 68001026800, 68001026808, 68001026900, 68001026908, 68001027000, 68001027100, 68001027108, 68001027200, 68001027208, 68001033200, 68001033203, 68001033400, 68001033408, 68001033500, 68001033700, 68084005801, 68084006001, 68084006101, 68084006201, 68084006401, 68084019601, 68084019701, 68084019801, 68084019811, 68084019901, 68084076521, 68084076525, 68084090321, 68115020730, 68115020760, 68115020830, 68115020860, 68115020890, 68115020930, 68115036330, 68115039630, 68180051201, 68180051202, 68180051209, 68180051301, 68180051303, 68180051309, 68180051400, 68180051401, 68180051403, 68180051430, 68180051501, 68180051503, 68180051509, 68180051601, 68180051602, 68180051609, 68180051701, 68180051703, 68180051709, 68180098001, 68180098003, 68180098101, 68180098103, 68180098201, 68180098202, 68387054330, 68645027254, 68645046954, 68645053254, 68645055054, 68645055154, 68645055254, 68645055354, 68645055454, 68645055554, 70882010330, 70882010430, 70882011030, 76282041701, 76282041705, 76282041801, 76282041810, 76282041845, 76282041890, 76282041901, 76282041910, 76282041945, 76282041990, 76282042001, 76282042010, 76282042018, 76282042045, 76282042090, 76282042101, 76282042105, 76282042201, 76282042205, 76282042210, 76282042218, 76282042245, 76282042290, 00054012322, 00054012422, 00054012522, 00093736410, 00093736498, 00093736510, 00093736556, 00093736598, 00093736610, 00093736656, 00093736698, 00245019301, 00245019310, 00245019330, 00245019390, 00245019401, 00245019410, 00245019430, 00245019490, 00245019501, 00245019510, 00245019530, 00245019590, 00378404177, 00378404277, 00378404293, 00378404377, 00378404393, 00591374510, 00591374519, 00591374610, 00591374619, 00591374630, 00591374710, 00591374719, 00591374730, 00603422402, 00603422432, 00603422502, 00603422516, 00603422532, 00603422602, 00603422616, 00603422632, 00781570010, 00781570092, 00781570110, 00781570131, 00781570192, 00781570210, 00781570231, 00781570292, 00781580510, 00781580592, 00781580610, 00781580631, 00781580692, 00781580710, 00781580731, 00781580792, 00904638961, 00904639061, 00904639161, 13668011310, 13668011390, 13668011410, 13668011430, 13668011490, 13668011510, 13668011530, 13668011590, 13668040910, 13668040930,

13668040990, 16571050050, 16571050111, 16571050211, 16714058102, 16714058103, 16714058201, 16714058202, 16714058203, 16714058301, 16714058302, 16714058303, 23155064403, 23155064409, 23155064410, 23155064503, 23155064509, 23155064510, 23155064603, 23155064609, 23155064610, 31722070005, 31722070010, 31722070090, 31722070110, 31722070130, 31722070190, 31722070210, 31722070230, 31722070290, 33342004407, 33342004410, 33342004444, 33342004507, 33342004510, 33342004544, 33342004610, 33342004644, 42291042210, 42291042310, 42291042410, 42571011010, 42571011090, 42571011110, 42571011190, 42571011210, 42571011290, 43063034730, 43063047714, 43063076690, 43063085460, 43063085490, 43063088130, 43547036009, 43547036050, 43547036103, 43547036109, 43547036111, 43547036203, 43547036209, 43547036211, 50268051615, 50268051715, 50268051815, 51079075020, 51079075120, 51079075220, 54569617300, 54569617301, 54569629400, 54569629401, 54569629700, 57237020490, 57237020499, 57237020590, 57237020599, 57237020690, 57237020699, 58657061010, 58657061050, 58657061090, 58657061110, 58657061130, 58657061190, 58657061210, 58657061230, 58657061290, 59746033310, 59746033390, 59746033410, 59746033430, 59746033490, 59746033510, 59746033530, 59746033590, 59762007001, 59762007101, 59762007102, 59762007201, 59762007202, 60429031610, 60429031630, 60429031690, 60429031710, 60429031730, 60429031790, 60429031810, 60429031830, 60429031890, 60505316008, 60505316009, 60505316103, 60505316108, 60505316109, 60505316203, 60505316209, 62332002730, 62332002790, 62332002791, 62332002830, 62332002890, 62332002891, 62332002930, 62332002990, 62332002991, 63739051310, 63739051410, 63739051510, 63739067310, 63739068610, 63739069810, 65862020190, 65862020199, 65862020230, 65862020290, 65862020299, 65862020330, 65862020390, 65862020399, 68084034601, 68084034701, 68084034801, 68180021003, 68180021009, 68180021103, 68180021106, 68180021109, 68180021203, 68180021206, 68180021209, 68180030702, 68180030709, 68180030802, 68180030809, 68180030902, 68180030906, 68180030909, 68180037603, 68180037609, 68180037703, 68180037709, 68180037803, 68382013501, 68382013506, 68382013510, 68382013516, 68382013601, 68382013606, 68382013610, 68382013616, 68382013701, 68382013706, 68382013710, 68382013716, 68645040670, 68645040754, 68645040770, 68645040870, 68645040954, 68645040970, 68645041070, 68645041154, 68645041170, 68645048654, 68645049454, 68645052470, 68645052570, 68645052670, 68645057754, 68645057854, 68645057954, 69543014011, 69543014090, 69543014111, 69543014130, 69543014190, 69543014211, 69543014230, 69543014290, 76439014011, 76439014090, 76439014111, 76439014130, 76439014190, 76439014211, 76439014230, 76439014290, 00078044705, 00078044805, 00078044905, 00078045005, 00083005930, 00083005932, 00083005990, 00083006330, 00083006332, 00083006390, 00083007930, 00083007932, 00083007990, 00083009430, 00083009432, 00083009490, 00247112430, 00247112510, 00247112530, 00247112560, 00247112610, 00247112630, 00247112660, 00247112710, 00247112730, 12280003300, 30698044801, 30698044901, 30698045001, 49999028730, 54569335900, 54569335901, 54569342300, 54569342301, 54569478800, 54868235001, 54868235002, 54868235003, 54868235004, 54868235100, 54868235102, 54868235103, 54868235200, 54868235201, 54868369001, 55289008630, 55289008697, 55289010930, 55289010997, 58016042000, 58016042010, 58016042030, 58016042060, 58016042090, 58016068500, 58016068510, 58016068530, 58016068560, 58016068590, 58016068600, 58016068610, 58016068630, 58016068660, 58016068690, 62682604403, 66336036630, 68115021530, 68115021630, 68115021730, 68115082400, 00048580501, 00048580541, 00048580601, 00048580641, 00048580701, 00048580741, 00074227811, 00074227813, 00074227911, 00074227913, 00074228011, 00074228013, 49999029430, 54868509900, 54868509901, 00597003928, 00597003937, 00597004028, 00597004037, 00597004128, 00597004137, 35356026830, 35356029530, 35356029630, 35356029830, 54868453901, 54868460501, 66105084203, 66105084206, 66105084209, 66105084210, 66105084228, 00093001701, 00093515001, 00247127700, 00574011001, 00574011215, 16252061001, 16252061101, 60505027101, 60505027201, 62175017137, 62175017737, 68462020801, 68462020901, 00087015822, 00087015845, 00087015846, 00087015850, 00087015885, 00087060941, 00087060942, 00087060945, 00087060950, 00087060985, 00087120212, 00087120213, 00247113130, 00247113160, 00247113230, 00247113260, 54569380800, 54569380900, 54569494800, 54569859200, 54868236800, 54868236801, 54868236802, 54868327900, 54868327902, 54868327903, 54868420900, 58864010430, 58864051015, 58864066730, 66105054609, 67544004215, 00093761056, 00093761156, 00093761198,

00093761256, 00093761298, 00378701293, 00378711277, 00378711293, 00378712477, 00378712493,  
13668024830, 13668024890, 13668024930, 13668024990, 13668025030, 13668025090, 16729032010,  
16729032110, 16729032115, 16729032117, 16729032210, 16729032215, 16729032217, 33342017807,  
33342017910, 33342018010, 42291054230, 42291054330, 42291054490, 42292003603, 42292003703,  
50228033910, 50228033930, 50228033990, 50228034010, 50228034030, 50228034090, 50228034110,  
50228034130, 50228034190, 57664075583, 57664075683, 57664075699, 57664075783, 57664075799,  
59746046330, 59746046530, 59746046590, 59746046630, 59746046690, 60505465203, 60505465303,  
60505465309, 60505465403, 60505465409, 62332013130, 62332013190, 62332013230, 62332013290,  
62332013330, 62332013390, 65862074130, 65862074230, 65862074290, 65862074330, 65862074390,  
67877044530, 67877044630, 67877044690, 67877044730, 67877044790, 68382064306, 68382064406,  
68382064416, 68382064506, 68382064516, 68462043630, 68462043730, 68462043790, 68462043830,  
68462043890, 00054011025, 00054011125, 00054011225, 10135059901, 10135060001, 65862028601,  
65862028701, 65862028801, 68180023501, 68180023601, 68180023701, 00006001528, 00006001531,  
00006001558, 00006001572, 00006001928, 00006001954, 00006001958, 00006001972, 00006001982,  
00006001986, 00006001987, 00006001994, 00006010628, 00006010631, 00006010654, 00006010658,  
00006010672, 00006010682, 00006010686, 00006010687, 00006010694, 00006020728, 00006020731,  
00006020754, 00006020758, 00006020772, 00006020782, 00006020786, 00006020787, 00006020794,  
00006023758, 00247191930, 00247192030, 00247192130, 54569175203, 54569205101, 54569205102,  
54569330001, 54569858300, 54868150100, 54868150101, 54868150200, 54868196000, 54868197001,  
54868197002, 55289057730, 55289092908, 55289092930, 57866670501, 57866670601, 57866798501,  
57866798901, 58016056400, 58016056430, 58016056460, 58016056490, 58016059908, 58016064600,  
58016064630, 58016064660, 58016064690, 58016076000, 58016076030, 58016076060, 58016076090,  
66105054803, 66105055510, 52652300101, 00093104505, 00093104598, 00093105005, 00093105098,  
00093105105, 00093105198, 00093105305, 00093105398, 00093545698, 00093545798, 00093545898,  
00093545998, 00247232030, 00247232060, 00247232090, 00378001777, 00378022677, 00378025477,  
00378027277, 00378111777, 12280022890, 21695039330, 21695039430, 23490936403, 31722026790,  
31722026890, 31722026990, 31722027090, 42291070190, 42291070290, 42291070390, 42291070490,  
43547041009, 43547041109, 43547041209, 43547041309, 49884099009, 49884099109, 49884099209,  
49884099309, 50268068815, 50268068915, 50268069015, 50268069115, 54569570900, 54569571000,  
54569571100, 54868524100, 54868524101, 54868524102, 54868524500, 54868524501, 54868524502,  
54868524600, 54868524601, 54868527900, 55111062190, 55111062290, 55111062390, 55111062490,  
59762501901, 59762502001, 59762502101, 59762502201, 60505017200, 60505017201, 60505017300,  
60505017301, 60505017400, 60505017401, 60505017500, 60505017501, 62037053190, 62037053290,  
62037053390, 62037053490, 63304054890, 63304054990, 63304055090, 63304055190, 63629124101,  
65862061790, 65862061890, 65862061990, 65862062090, 68001018605, 68001018705, 68001018805,  
68001018905, 68001026005, 68084089925, 68180055409, 68180055609, 68180055709, 68180055809,  
68180055909, 69097083905, 69097084105, 69097084205, 69097084305, 00054010625, 00054010720,  
00054010725, 00054010729, 00054010820, 00054010825, 00054010829, 00054010925, 00054010929,  
00093743601, 00093743701, 00093743801, 00228269511, 00228269550, 00228269611, 00228269650,  
00228269711, 00228269750, 00781212601, 00781212701, 00781212705, 00781212801, 00781212805,  
00781212901, 00781212905, 16252057030, 16252057101, 16252057150, 16252057201, 16252057250,  
16252057301, 16252057350, 16729015201, 16729015301, 16729015316, 16729015401, 16729015416,  
16729015501, 16729015516, 21695082130, 24658020001, 24658020005, 24658020101, 24658020105,  
24658020201, 24658020205, 24658020301, 24658020305, 31722027101, 31722027201, 31722027205,  
31722027210, 31722027301, 31722027305, 31722027310, 31722027401, 31722027405, 31722027410,  
42291069201, 43063030330, 43063030390, 43063050230, 51655011752, 54569611100, 54569611101,  
54569611200, 54569611201, 54868584200, 54868584300, 54868585600, 54868589600, 55111043890,  
55111043905, 55111043990, 55111044005, 55111044090, 55111044105, 55111044190, 57237022201,  
57237022230, 57237022301, 57237022305, 57237022401, 57237022405, 57237022501, 57237022505,  
60429003801, 60429003901, 60429003910, 60429004001, 60429004010, 60429004101, 60429004110,  
60505287501, 60505287600, 60505287601, 60505287605, 60505287700, 60505287701, 60505287705,

60505287800, 60505287801, 60505287805, 60687032121, 60687033201, 60687034301, 60687035401, 63629125401, 65862047401, 65862047430, 65862047501, 65862047505, 65862047601, 65862047605, 65862047701, 65862047705, 67253067110, 67253067210, 67253067211, 67253067310, 67253067311, 67253067410, 67253067411, 68001014004, 68001014100, 68001014103, 68001014200, 68001014203, 68001014300, 68001014303, 68084026601, 68084026701, 68084026801, 68084029421, 68180058801, 68180058901, 68180058902, 68180058909, 68180059001, 68180059002, 68180059009, 68180059101, 68180059102, 68180059109, 68382014401, 68382014405, 68382014406, 68382014501, 68382014505, 68382014506, 68382014601, 68382014605, 68382014606, 68382014701, 68382014705, 68382014706, 76282027101, 76282027201, 76282027205, 76282027301, 76282027305, 76282027401, 76282027405, 00054054218, 00054054318, 00054054418, 00378292077, 00378292093, 00378292177, 00378292193, 00378292277, 00378292293, 00591329215, 00591329315, 00591329415, 00603591416, 00603591516, 00603591616, 00781537264, 00781537464, 00781537864, 13668015630, 13668015672, 13668015730, 13668015772, 13668015830, 13668015872, 31722080234, 31722080235, 31722080236, 31722080334, 31722080335, 31722080337, 31722080434, 31722080435, 31722080437, 42291079030, 42291079130, 42291079230, 43547028303, 43547028403, 43547028503, 59746044032, 62332008730, 62332008830, 62332008930, 65862086703, 65862086803, 65862086903, 67877048284, 67877048384, 67877048484, 68382047178, 68382047278, 68382047378, 684620201913, 68462020013, 68462020113, 00051504401, 00051504442, 00051504601, 00051504642, 00074302511, 00074304011, 54868472000, 54868472001, 54868472002, 54868472003, 54868546600, 54868546601, 60598010001, 60598010101, 64455013001, 64455013101, 00093732501, 00093732601, 00093732701, 00143912501, 00143912601, 00143912701, 00378324101, 00378324201, 00378324301, 00781532001, 00781532101, 00781532201, 16252054130, 16252054290, 16252054390, 42806005201, 42806005301, 42806005401, 57237008901, 57237009001, 57237009101, 59762214001, 59762214006, 59762214101, 59762214106, 59762214201, 59762214206, 60429097801, 60429097901, 60429098001, 65862016401, 65862016501, 65862016601, 67253010610, 67253010710, 68180056601, 68180056701, 68180056801, 00091370701, 00091370709, 00091371501, 00091371509, 54569427600, 54569499000, 54868408800, 54868408801, 54868408802, 54868542300, 54868542301, 00093743156, 00093743298, 00093743398, 00093743498, 00378580793, 00378581377, 00378581477, 00378581577, 00591216719, 00591216730, 00591216810, 00591216819, 00591216910, 00591216919, 00591217005, 00591217019, 00603634002, 00603634102, 00603634128, 00603634202, 00603634228, 00603634302, 00603634328, 00781560731, 00781560892, 00781561892, 00781561992, 00904659461, 00904659561, 13668006730, 13668006890, 13668006990, 13668007090, 29300023213, 29300023319, 29300023419, 29300023519, 31722074530, 31722074690, 31722074790, 31722074890, 33342006207, 33342006310, 33342006410, 33342006510, 42291087690, 42291087710, 42291087790, 42291087810, 42291087890, 42291087950, 42291087990, 42291088090, 42291088110, 42291088190, 42291088210, 42291088290, 42291088350, 42291088390, 43547036703, 43547036809, 43547036909, 43547037009, 50268078315, 50268078415, 50268078515, 50268078613, 51660014030, 51660014190, 51660014290, 51660014390, 52343012230, 52343012390, 52343012490, 52343012590, 59746036030, 59746036190, 59746036290, 59746036390, 60687012801, 60687013901, 62332004430, 62332004490, 62332004571, 62332004590, 62332004671, 62332004690, 62332004771, 62332004790, 65162083703, 65162083809, 65162083909, 65162084009, 65862057030, 65862057190, 65862057290, 65862057390, 68084080401, 68084082201, 68180027601, 68180027606, 68180027703, 68180027709, 68180027803, 68180027809, 68180027902, 68180027909, 00006001428, 00006001468, 00006001482, 00006001487, 00006001494, 00006001498, 00006071228, 00006071268, 00006071281, 00006071282, 00006071287, 00006071294, 00006071298, 00006071328, 00006071368, 00006071381, 00006071382, 00006071387, 00006071394, 00006071398, 00006071428, 00006071468, 00006071482, 00006071487, 00006071494, 00006350801, 00006350804, 00006382401, 00006382404, 00187014030, 00187014090, 00187014130, 00187014190, 00187014210, 00187014230, 00187014290, 00187014310, 00187014330, 00187014390, 00247057802, 00247057803, 00247057830, 00247057845, 00247057903, 00247057930, 00247138014, 00403224101, 00403224130, 54569060600, 54569060601, 54569060602, 54569060603, 54569060700, 54569060701, 54569060703, 54569061200, 54569325801, 54868054100, 54868054101, 54868054103, 54868062001, 54868062002, 54868062003, 54868062005, 54868109001, 54868109005, 54868109006,

54868228000, 54868228002, 55175395400, 55175395405, 55175395503, 55289048330, 55289062203, 55289062230, 58016057100, 58016057130, 58016057160, 58016057190, 60346053430, 60346061230, 60346061290, 60346090130, 64455014010, 64455014030, 64455014090, 64455014110, 64455014130, 64455014190, 64455014210, 64455014230, 64455014290, 64455014310, 64455014330, 64455014390, 00038013010, 00038013034, 00038013039, 00038013110, 00038013134, 00038013139, 00038013210, 00038013234, 00038013239, 00038013410, 00247102300, 00247102330, 00247102359, 00247102360, 00247102377, 00247102379, 00247102395, 00247114710, 00247114730, 00247114760, 00247114810, 00247139630, 00310013010, 00310013011, 00310013034, 00310013039, 00310013110, 00310013111, 00310013134, 00310013139, 00310013173, 00310013210, 00310013211, 00310013234, 00310013239, 00310013273, 00310013310, 00310013311, 00310013410, 00310013411, 00310013510, 00310013511, 00403277901, 00403277930, 00403302901, 00403302930, 52427043890, 52427043990, 52427044090, 52427044190, 52427044290, 52427044390, 54569194400, 54569194401, 54569194402, 54569194403, 54569266501, 54569266502, 54569377100, 54569851500, 54569852700, 54569858400, 54868100101, 54868129601, 54868129602, 54868196101, 54868196102, 55175396403, 55289010630, 55289050930, 58016036214, 58016036221, 58016036228, 58016036300, 58016036314, 58016036321, 58016036330, 58016036360, 58016095600, 58016095630, 58016095660, 58016095690, 58016263814, 58016263821, 58016263830, 58016263860, 58016263890, 58864065430, 60346053730, 60346059530, 60346087103, 60346087130, 68115036130, 68115036200, 68115036260,

**Anticoagulants**

00007440710 , 65293000101, 65293000422, 00007440701, 00007440754, 00078093061, 00143928801, 00143955901, 00143967401, 00409114001, 00703002031, 00703002032, 00781328512, 00781331491, 00781331495, 00781931495, 42023018201, 42367020207, 42367020284, 42367020384, 55150024110, 63323052603, 67457021202, 00007323002, 00007323011, 00007323202, 00007323211, 00007323402, 00007323411, 00007323602, 00007323611, 35356007802, 35356007810, 35356007902, 35356007910, 35356008002, 35356008010, 35356008102, 35356008110, 66203230001, 66203230002, 67457059210, 67457059304, 67457059406, 67457059508, 69853020101, 69853020201, 00409830010, 00409830015, 00781315895, 00781915895, 16729027567, 55111065237, 55150021010, 60505610104, 63323056210, 63323056215, 67457025610, 00056016870, 00056016875, 00056016890, 00056016970, 00056016975, 00056016990, 00056017030, 00056017070, 00056017075, 00056017090, 00056017230, 00056017270, 00056017275, 00056017290, 00056017370, 00056017375, 00056017470, 00056017475, 00056017630, 00056017670, 00056017675, 00056017690, 00056018870, 00056018875, 00056018890, 00056018970, 00056018975, 00056018990, 00059032435, 00247152800, 00247152830, 00247152900, 00247152930, 00247153000, 00247153030, 00247153100, 00247153130, 00247153200, 00247153230, 00247153300, 00247153330, 00247153400, 00247153430, 00590032435, 49999009330, 49999041130, 54569015800, 54569015801, 54569015900, 54569015901, 54569021201, 54569444300, 54569854200, 54868125900, 54868212800, 54868212900, 54868215400, 54868339900, 54868525500, 55289014397, 55289028630, 55289028650, 55289028697, 58864022314, 66267062800, 66267062900, 66267063000, 66267063100, 66267063200, 66267063300, 66267063400, 66267063500, 66267063600, 67544040115, 00074628602, 00074628611, 00074628702, 00074628703, 00074776003, 00074776103, 00074779312, 00074779323, 00074779361, 00074779362, 00074779412, 00074779423, 00074779462, 00264557710, 00264956710, 00264957710, 00264958720, 00338044903, 00338045003, 00338045102, 00338054903, 00338055002, 00338055003, 00409776003, 00409776103, 00409779323, 00409779362, 00409779462, 15082072950, 52533010630, 61553040246, 61553040302, 61553041902, 63323052277, 63323052374, 71019011502, 71019013103, 00074379401, 00003089321, 00003089331, 00003089421, 00003089431, 00003089470, 00003376474, 00078135006, 00548560100, 00548560200, 00548560300, 00548560400, 00548560500, 00548560600, 00548560700, 00548563100, 00548563200, 00548563300, 00548563400, 00548563500, 00548563600, 00548563700, 00703851021, 00703851023, 00703853021, 00703853023, 00703854021, 00703854023, 00703856021, 00703856023, 00703858021, 00703858023, 00703861021, 00703861023, 00703868021, 00703868023, 00781311963, 00781311964, 00781311966, 00781311968, 00781311969, 00781312168, 00781312169, 00781312293, 00781313363, 00781322464, 00781335666, 00781342868, 00781350069, 00781361268, 00781365569, 00955100310, 00955100410, 00955100610, 00955100810, 00955101010, 00955101210, 00955101510, 00955101601, 60505079100, 60505079104, 60505079200, 60505079204, 60505079300, 60505079304, 60505079400, 60505079404, 60505079501, 60505079504, 60505079600, 60505079604, 60505079800, 60505079804, 62037083920, 62037084920, 62037086120, 62037086220, 62037086320, 62037086420, 62037086620, 63323056586, 63323056593, 63323056883, 63323056884, 63323056887, 63323056888, 63323056890, 63323056894, 63323056895, 63323056896, 63323056898, 63323056899, 63323056984, 63323056990, 63323056995, 63323056999, 43598060602, 43598060610, 43598060702, 43598060710, 43598060802, 43598060810, 43598060902, 43598060910, 55111067802, 55111067810, 55111067902, 55111067910, 55111068002, 55111068010, 55111068102, 55111068110, 55150023010, 55150023110, 55150023210, 55150023310, 60505607804, 60505607904, 60505608004, 60505608104, 67457058210, 67457058304, 67457058406, 67457058508, 67457069310, 67457069410, 67457069510, 67457069610, 00013240691, 00013242601, 00013242691, 00013243606, 00013519001, 00013519101, 00069019502, 00069019602, 00069020602, 00069021702, 00069022002, 00069022302, 00069022802, 00069023201, 62856010101, 62856010110, 62856010201, 62856012501, 62856012510, 62856015001, 62856015010, 62856018001, 62856018010, 62856025001, 62856025010, 62856025101, 62856050001, 62856050010, 62856075001, 62856075010, 00641027221, 00641027225, 00641027321, 00641027325, 00641039225, 00641039325, 00641041425, 00641243641, 00641243645, 00641243841, 00641243845, 00641244241, 00641244245, 00641244341, 00641244345, 00641326009, 00641326109, 00024072503, 00024073602, 00024073603, 00024072502, 00074138932, 15082071110,



15082071350, 15082071668, 15082071805, 15082071965, 15082072265, 24200068010, 24200068710, 24200070907, 24200071013, 24200072213, 24200072304, 24200072710, 24200072845, 24200172213, 00008048701, 00008048703, 00008048750, 00008048751, 00008052301, 00008052302, 00008052350, 00008052351, 00008252801, 00008252802, 00008252803, 00008252850, 00008252851, 00008252852, 00008252901, 00008252902, 00008252903, 00008252950, 00008252951, 00008252952, 00024072101, 00024072102, 00024072112, 00024072113, 00024072114, 00024072115, 00024072116, 00024072117, 00024072118, 00024072120, 00024072124, 00024072125, 00024072132, 00024072134, 00024072199, 00024072212, 00024072213, 00024072214, 00024072215, 00024072216, 00024072217, 00024072221, 00024072222, 00024072224, 00024072225, 00024072226, 00024072227, 00024072233, 00024072235, 00024072299, 00074115112, 00074115114, 00074115170, 00074115178, 00074115212, 00074115214, 00074115270, 00074115278, 00074128001, 00074128002, 00074128003, 00074128005, 00074128011, 00074128012, 00074128013, 00074128015, 00074128021, 00074128022, 00074128023, 00074128025, 00074128031, 00074128032, 00074128033, 00074128035, 00074128101, 00074128102, 00074128103, 00074128105, 00074128111, 00074128112, 00074128113, 00074128115, 00074128121, 00074128122, 00074128123, 00074128125, 00074128131, 00074128132, 00074128133, 00074128135, 00074128202, 00074138901, 00074138902, 00074345405, 00074345425, 00074482201, 00223786101, 00223786302, 00223786501, 00223786702, 00338810669, 00338811070, 00338820669, 00338820969, 00338821070, 00409115112, 00409115170, 00409115178, 00409115212, 00409115270, 00409115278, 00409128031, 00409128032, 00409128033, 00409128035, 00409128131, 00409128132, 00409128133, 00409128135, 00469170030, 00469310525, 00469504401, 00469504501, 00469504505, 00641038721, 00641038725, 00641038925, 00641041125, 00641326209, 00641326309, 00741011901, 00741012001, 08290034002, 08290034003, 08290035005, 08290036003, 08290036005, 08290036006, 08290036105, 08290037002, 08290037003, 08290038003, 08290038005, 08290039003, 08290039005, 08290039105, 08290306509, 08290306510, 08290306511, 08290306512, 08290306513, 08290306514, 08290306515, 08290306516, 08290306517, 08290306521, 08290306525, 08290306527, 08290306528, 08290306531, 08450602603, 08450603005, 08450603403, 08450603705, 08450604603, 08450604903, 08450605005, 08450605503, 08450605805, 08881580123, 08881580125, 17474012301, 17474012302, 17474012303, 17474012305, 17474012501, 17474012502, 17474012503, 17474012505, 39769001101, 39769001102, 39769001105, 39769001801, 39769001802, 39769001805, 39769003510, 39769003610, 39769003630, 59747010671, 59747010673, 59747010675, 59747010681, 59747010683, 59747010685, 59747010771, 59747010773, 59747010775, 59747010781, 59747010783, 59747010785, 62338021403, 62338022303, 62338022503, 62338313701, 62338332701, 62338352701, 62338531303, 63323001710, 63323054401, 63323054411, 63323054431, 63323054501, 63323054505, 63323054901, 63323055701, 63807030035, 63807040035, 63807050005, 63807050055, 63807060005, 63807060051, 63807060055, 63807066051, 64253022211, 64253022212, 64253022221, 64253022222, 64253022223, 64253022225, 64253022230, 64253022233, 64253022235, 64253033311, 64253033312, 64253033321, 64253033322, 64253033323, 64253033325, 64253033330, 64253033333, 64253033335, 64253044421, 64253044422, 64253044423, 64253044425, 64253044430, 64253044433, 64253044435, 68883001003, 68883001004, 68883001005, 68883001006, 00002721701, 00008027501, 00008027550, 00008027601, 00008027701, 00008027702, 00008027703, 00008027802, 00008029301, 00008048201, 00009026807, 00009031701, 00009031708, 00009031709, 00024073302, 00024073303, 00024073304, 00024073305, 00024073312, 00024073315, 00024073350, 00024073357, 00024073359, 00024079302, 00024079312, 00069005801, 00069005901, 00069005903, 00069006201, 00069013703, 00074131601, 00074131602, 00074131611, 00074131612, 00074131613, 00074131614, 00074131631, 00074131632, 00074131666, 00074140201, 00074140211, 00074140231, 00074258102, 00074258202, 00074258302, 00074258402, 00209422014, 00223780101, 00223781010, 00223781130, 00223781801, 00223782010, 00223782801, 00223783004, 00223783105, 00223783210, 00223784001, 00223784005, 00223784310, 00223784430, 00223784525, 00223784601, 00223784704, 00223784725, 00247119530, 00247119550, 00364236446, 00364236448, 00364236453, 00364653854, 00364653954, 00364654046, 00364654048, 00364654053, 00402004910, 00402005005, 00402041810, 00402051905, 00409131625, 00409131632, 00409131666, 00409140212, 00409140231, 00409272001, 00409272002, 00409272003, 00409272101,

00409272301, 00409272302, 00418434105, 00418434141, 00418435105, 00418435141, 00418446105,  
00463103404, 00463103405, 00469081330, 00469081350, 00469083300, 00469083370, 00469092330,  
00469103315, 00469115515, 00469126215, 00469215215, 00469276010, 00469504001, 00469504201,  
00536490070, 00536492570, 00536495065, 00641039102, 00641039112, 00641039125, 00641040002,  
00641040012, 00641040021, 00641040025, 00641041002, 00641041012, 00641041025, 00641244041,  
00641244045, 00641245041, 00641245045, 00641245055, 00641246041, 00641246045, 00641246055,  
00641247041, 00641247045, 00641326403, 00641326603, 00641326703, 00641326803, 00677027521,  
00781332795, 00814365540, 10974000205, 10974001010, 11743021002, 25021040001, 25021040010,  
25021040030, 25021040066, 25021040067, 25021040102, 25021040201, 25021040210, 25021040266,  
25021040301, 25021040304, 25021040366, 25021040401, 39769001910, 39769001930, 49072029130,  
49072029710, 49072029905, 62338510503, 62338521303, 63323004710, 63323026201, 63323026255,  
63323027602, 63323045909, 63323054001, 63323054011, 63323054031, 63323054057, 63323054201,  
63323054207, 63323054302, 63323091501, 63739090026, 63739090128, 63739092025, 63739093114,  
63739093128, 63739094229, 63739095325, 63739096425, 63739098625, 67457037299, 67457037399,  
67457037499, 67457038399, 67457038499, 67457038599, 67457060299, 67457060399, 76045010810,  
00009026801, 00009026802, 00009026812, 00009029101, 00009031702, 00009031710, 00009031711,  
63323003810, 63323003830, 00409258102, 00409258402, 00069004301, 00074762003, 00074762059,  
00264987210, 00338043103, 00338043304, 00409762003, 00409762059, 15082071099, 15082071550,  
24200071313, 61553090403, 61553090503, 61553090603, 61553090904, 61553091104, 61553091504,  
61553091604, 70004066246, 71019010503, 71019010505, 71019011703, 71019012001, 71019012203,  
71019012204, 71019012205, 71019012703, 00074765062, 00074765103, 00074765162, 00409765062,  
00409765103, 00409765162, 15082072061, 15082072167, 15082073450, 15082074650, 61553020302,  
61553020403, 61553091304, 61553091404, 63323051774, 63323051877, 71019011206, 71019012102,  
71019012901, 00056034208, 00056034253, 50222034208, 54653034208, 54653034253, 67211034208,  
67211034253, 00187001110, 42998071510, 51292011112, 51292013101, 83055011112, 00832121100,  
00832121101, 00832121110, 00832121189, 00832121200, 00832121201, 00832121210, 00832121289,  
00832121300, 00832121301, 00832121310, 00832121389, 00832121400, 00832121401, 00832121410,  
00832121489, 00832121500, 00832121501, 00832121510, 00832121589, 00832121600, 00832121601,  
00832121610, 00832121689, 00832121700, 00832121701, 00832121710, 00832121800, 00832121801,  
00832121850, 00832121889, 00832121900, 00832121901, 00832121950, 00832121989, 54868082500,  
54868121600, 54868520700, 59747003702, 59747003703, 59747003705, 59747006002, 59747006003,  
59747006005, 59747011771, 59747011773, 59747011775, 59747011871, 59747011873, 59747011875,  
00075062040, 00075062041, 00075062160, 00075062161, 00075062280, 00075062281, 00075062300,  
00075062301, 00075062403, 00075062430, 00075062431, 00075062603, 00075062604, 00075291201,  
00075291202, 00075291501, 00075291502, 00075801310, 00075801410, 00075801610, 00075801810,  
00075802010, 00075802210, 00075802510, 00075803001, 54868511200, 54868544000, 54868544001,  
54868558700, 54868558701, 54868583500, 54868583700, 58016487201, 68115074910, 68115077410,  
00085079505, 08881590121, 08881590123, 08881590125, 00008086001, 00008086101, 00052083011,  
00052083061, 08290306413, 08290306414, 08290306423, 08290306424, 00597010754, 00597010760,  
00597010854, 00597010860, 00597013554, 00597013560, 00597014954, 00597014960, 00597035509,  
00597035556, 00597036055, 00597036082, 54569627600, 00088215057, 50419015057, 65597020130,  
65597020205, 65597020230, 65597020290, 65597020305, 65597020330, 65597020390, 00093171201,  
00093171210, 00093171301, 00093171310, 00093171401, 00093171410, 00093171501, 00093171601,  
00093171610, 00093171801, 00093171901, 00093172001, 00093172101, 00093172110, 00093172301,  
00182267101, 00182267110, 00182267189, 00182267201, 00182267210, 00182267289, 00182267301,  
00182267310, 00182267389, 00182267401, 00182267489, 00182267501, 00182267589, 00182267601,  
00182267610, 00182267689, 00182267701, 00182267789, 00182267801, 00182267889, 00182267901,  
00182267989, 00182276301, 00247225203, 00247225206, 00339653712, 00339653812, 00339653912,  
00339654012, 00339654112, 00339654212, 00339654312, 00339654412, 00339654512, 00378880101,  
00378880110, 00378880201, 00378880210, 00378880301, 00378880310, 00378880401, 00378880410,  
00378880501, 00378880601, 00378880610, 00378881001, 00378881010, 00378882501, 00378882510,

00378887501, 00378887510, 00406205201, 00406205210, 00406205301, 00406205310, 00406205401, 00406205410, 00406205501, 00406205510, 00406205601, 00406205610, 00406205701, 00406205801, 00406205901, 00406206401, 00406206410, 00406506410, 00555083102, 00555083105, 00555083202, 00555083205, 00555083302, 00555083305, 00555083402, 00555083405, 00555083502, 00555083504, 00555086902, 00555086905, 00555087402, 00555087405, 00555092502, 00555092602, 00615150929, 00615151029, 00615151229, 00615454729, 00615454829, 00615454929, 00615455029, 00615455129, 00781035207, 00781036307, 00781036407, 00781036607, 00781036907, 00781037707, 00781038107, 00781038607, 00781038707, 15330010001, 15330010010, 15330010101, 15330010110, 15330010201, 15330010210, 15330010601, 15330010701, 15330010801, 15330026601, 15330026701, 15330026801, 15330026810, 21695067330, 21695067730, 23490647801, 23490647802, 23490647803, 23490648001, 23490648002, 23490648003, 23490648101, 23490648102, 23490648103, 23490648201, 23490648202, 23490648203, 23490648301, 23490648302, 23490648303, 23490648401, 23490648402, 23490648403, 31722032701, 31722032710, 31722032801, 31722032810, 31722032901, 31722032910, 31722033001, 31722033010, 31722033101, 31722033110, 31722033201, 31722033210, 31722033301, 31722033401, 31722033501, 38779047410, 38779047425, 43063017614, 43063017630, 43063021830, 43063047130, 43063065530, 49452813601, 49452813602, 49999057600, 49999057610, 49999057620, 49999082900, 49999092310, 51079090820, 51079090920, 51079091020, 51079091320, 51079091520, 51672402701, 51672402703, 51672402707, 51672402801, 51672402803, 51672402807, 51672402901, 51672402903, 51672402907, 51672403001, 51672403003, 51672403007, 51672403101, 51672403103, 51672403107, 51672403201, 51672403203, 51672403207, 51672403301, 51672403303, 51672403401, 51672403403, 51672403501, 51672403503, 52959092430, 52959092530, 52959092630, 54569493400, 54569493401, 54569493402, 54569586800, 54569586900, 54569622400, 54569622500, 54569631200, 54569631300, 54868245401, 54868245402, 54868428600, 54868434900, 54868440000, 54868440200, 54868442200, 54868442201, 54868442203, 54868487100, 54868487300, 54868495000, 54868525800, 55045288108, 55045290200, 55289034030, 55289077314, 55289077330, 55289077360, 55289077390, 55887004401, 55887004430, 55887004460, 55887004490, 55887026401, 55887026430, 55887026490, 55887046430, 55887046490, 55887057710, 55887057730, 55887057760, 55887057790, 55887057810, 55887057830, 55887057860, 55887057886, 55887057890, 55887092630, 55887092690, 57237011901, 57237011999, 57237012001, 57237012099, 57237012101, 57237012199, 57237012201, 57237012299, 57237012301, 57237012399, 57237012401, 57237012499, 57237012501, 57237012599, 57237012601, 57237012699, 57237012701, 57237012799, 58016008300, 58016008330, 58016008360, 58016008390, 58016069700, 58016069730, 58016069760, 58016069790, 58864003530, 58864069814, 58864077315, 58864087930, 59772035204, 59772035207, 59772035208, 59772035270, 59772036304, 59772036307, 59772036308, 59772036370, 59772036404, 59772036407, 59772036408, 59772036470, 59772036607, 59772036907, 59772036908, 59772036970, 59772037704, 59772037707, 59772037708, 59772037770, 59772038107, 59772038607, 59772038670, 59772038707, 59772038770, 60429078401, 60429078410, 60429078477, 60429078501, 60429078510, 60429078577, 60429078590, 60429078601, 60429078610, 60429078645, 60429078677, 60429078701, 60429078710, 60429078745, 60429078777, 60429078801, 60429078810, 60429078830, 60429078877, 60429078901, 60429078910, 60429078915, 60429078930, 60429078940, 60429078945, 60429078977, 60429078990, 60429079001, 60429079010, 60429079015, 60429079077, 60429079101, 60429079177, 60429079201, 60429079245, 60429079277, 62580499477, 62580498401, 62584098477, 62584098601, 62584099401, 62584099477, 63739036101, 63739036103, 63739036110, 63739036115, 63739036201, 63739036203, 63739036210, 63739036215, 63739036301, 63739036303, 63739036310, 63739036315, 63739036401, 63739036403, 63739036410, 63739036415, 65162076110, 65162076111, 65162076210, 65162076211, 65162076310, 65162076311, 65162076410, 65162076411, 65162076510, 65162076511, 65162076610, 65162076611, 65162076710, 65162076711, 65162076810, 65162076811, 65162076910, 65162076911, 66336025030, 66336025230, 68080402777, 68080414677, 68080414877, 68084002701, 68084014677, 68084402777, 68084414777, 68115035930, 68115039930, 68115065900, 68382005201, 68382005210, 68382005301, 68382005310, 68382005401, 68382005410, 68382005501, 68382005510, 68382005601, 68382005610, 68382005616, 68382005701, 68382005801, 68382005901, 68382006401, 68382006410, 76282032701, 76282032710, 76282032801, 76282032810,

76282032901, 76282032910, 76282033001, 76282033010, 76282033101, 76282033110, 76282033201, 76282033210, 76282033301, 76282033310, 76282033401, 76282033501, 50458057710, 50458057718, 50458057760, 50458057810, 50458057830, 50458057890, 50458057910, 50458057930, 50458057989, 50458057990, 50458058010, 50458058030, 50458058090, 50458058451

**Beta-blockers**

00182262901, 00182263001, 00378120001, 00378140001, 00536563601, 00536563701, 00591043701, 00591043801, 00603204621, 00603204721, 00603204821, 00839808406, 00904513860, 00904513960, 00904617360, 10135063001, 10135063101, 23629000101, 38779048910, 38779048925, 38779048950, 42291010190, 42291010290, 49884058701, 49884058801, 50268005015, 50268005115, 51927290600, 52544043701, 52544043801, 53746066901, 53746067001, 54868552000, 58016030000, 58016030030, 58016030060, 58016030090, 59911584201, 59911584401, 62991100101, 65162066910, 65162067010, 00003025624, 00003025774, 00003504050, 00003504075, 00003524050, 00005321834, 00005321843, 00005321934, 00005321943, 00005322034, 00005322043, 00093075201, 00093075210, 00093075301, 00093075305, 00093078701, 00093078710, 00182100101, 00182100189, 00182100401, 00182100410, 00182100489, 00182100501, 00182100589, 00182823589, 00182823689, 00247101200, 00247101230, 00247107200, 00247107206, 00247107214, 00247107230, 00247107260, 00247107290, 00247114602, 00247114607, 00247114630, 00247114660, 00364251301, 00364251302, 00364251390, 00364251401, 00364251490, 00378021801, 00378021810, 00378023101, 00378023110, 00378075701, 00378075710, 00378075793, 00405410601, 00405410701, 00405410703, 00405410801, 00406202201, 00406202210, 00406202301, 00406202310, 00406202401, 00406202410, 00440717030, 00440717110, 00440717230, 00536332501, 00536332505, 00536333001, 00536333010, 00536333101, 00591577701, 00591577710, 00591577801, 00603237021, 00603237121, 00603237132, 00603237221, 00615353213, 00615353243, 00615353253, 00615353263, 00615353313, 00615354443, 00615354453, 00615354463, 00677147801, 00677147810, 00677147901, 00677147910, 00677163301, 00781107801, 00781107810, 00781150601, 00781150610, 00781150613, 00781150701, 00781150710, 00781150713, 00781522001, 00781522010, 00781522501, 00781522510, 00781522901, 00781522910, 00839772306, 00839772316, 00839772406, 00839774106, 00839774116, 00839774206, 00839795106, 00904539260, 00904539261, 00904539280, 00904763460, 00904763461, 00904763480, 00904763560, 00904763561, 11845048901, 11845048904, 11845049001, 13411016901, 13411016903, 13411016906, 13411016909, 13411016910, 13411017601, 13411017603, 13411017606, 13411017609, 13411017610, 15330002501, 15330002510, 15330002801, 15330002810, 15330002901, 15330002910, 16571043011, 16571043111, 16571044111, 16714003104, 16714003106, 16714003204, 16714003206, 16714003304, 16714003306, 21695032230, 21695032290, 21695032330, 21695032360, 21695032430, 23490509601, 23490509602, 23490509603, 23490509701, 23490509702, 23490509703, 23490509801, 23490509802, 33358003700, 33358003730, 33358003760, 33358003800, 33358003830, 33358003860, 33358003900, 33358003930, 38779026210, 38779026225, 42291014010, 42291014018, 42291014045, 42291014090, 42291014110, 42291014118, 42291014145, 42291014190, 42291014218, 42291014245, 42291014250, 42291014290, 43063006206, 43063006230, 43063006260, 43063006290, 43063029730, 43063029790, 43063031630, 43063031690, 43063076530, 43063076590, 43063080501, 43063080530, 43063080590, 43353039960, 49452002001, 49452002002, 49452002003, 49452076504, 49502040001, 49502040101, 49884045601, 49884045610, 49884045701, 49884045710, 49884094401, 49884094410, 49999010400, 49999010430, 49999010460, 49999010490, 49999017800, 49999017830, 49999045400, 49999045410, 49999045430, 49999045460, 49999045490, 50742010101, 50742010110, 50742010201, 50742010210, 50742010301, 50742010310, 51079068419, 51079068420, 51079068463, 51079068520, 51079075919, 51079075920, 51079075963, 51285083602, 51285083604, 51285083605, 51285083702, 51285083704, 51285083705, 51285083802, 51285083804, 51285083805, 51655053024, 51655053025, 51655053224, 51655092624, 52189025624, 52189025629, 52189025630, 52189025724, 52189025729, 52189025730, 52189025924, 52189025929, 52189025930, 52555000601, 52555000610, 52555000701, 52555053101, 52555053110, 52555053401, 52555067301, 52555067310, 52555067401, 52959025300, 52959025320, 52959025330, 52959025340, 52959025830, 52959046301, 52959046330, 52959046360, 53265041210, 53265041211, 53265041310, 53265041311, 53265041410, 53265041411, 53489052901, 53489052910, 53489053001, 53489053010, 53489053601,

53489053610, 53978119905, 54348014230, 54348016830, 54458093105, 54569343200, 54569343201, 54569343202, 54569343203, 54569343204, 54569343205, 54569343207, 54569343208, 54569365400, 54569365401, 54569365402, 54569365403, 54569365404, 54569365405, 54569388500, 54569388502, 54569388504, 54569388505, 54569800800, 54569800801, 54569850700, 54569850701, 54569859000, 54868187100, 54868187101, 54868187102, 54868187104, 54868197100, 54868197101, 54868197103, 54868197104, 54868234901, 54868234902, 54868234903, 54868234904, 54868234905, 54921010110, 54921010139, 54921010510, 54921010534, 54921010539, 54921010710, 55045186001, 55045186002, 55045186006, 55045186008, 55045186009, 55045226901, 55045226902, 55045226906, 55045226908, 55045226909, 55045249801, 55045249808, 55289022701, 55289022730, 55289022790, 55289022797, 55289022801, 55289022803, 55289022806, 55289022814, 55289022830, 55289022860, 55289022890, 55289022897, 55289065330, 55289065390, 55370012207, 55370012209, 55370012407, 55887059930, 55887059960, 55887059990, 55887083801, 55887083830, 55887083860, 55887083890, 55887099830, 55887099860, 55887099890, 55953003940, 55953003980, 55953040140, 57480044601, 57480044606, 57480044701, 57480044706, 57664026418, 57664026488, 57664026518, 57664026588, 57664026618, 57664026688, 57866333001, 57866333003, 57866333101, 57866333102, 57866333103, 57866333201, 57866333203, 58016033300, 58016033315, 58016033330, 58016033360, 58016058200, 58016058215, 58016058220, 58016058230, 58016058260, 58016077100, 58016077112, 58016077115, 58016077120, 58016077130, 58016077160, 58864006501, 58864006530, 58864071730, 58864074930, 58864074990, 59591000768, 59591026368, 59591026382, 59591026568, 60429002510, 60429002530, 60429002590, 60429002610, 60429002630, 60429002690, 60429002710, 60429002790, 60429021130, 60429021190, 60809010255, 60809010272, 60814071001, 60814071010, 60814071101, 60814071110, 61392054230, 61392054231, 61392054232, 61392054239, 61392054245, 61392054251, 61392054254, 61392054260, 61392054265, 61392054290, 61392054291, 61392054330, 61392054331, 61392054332, 61392054339, 61392054345, 61392054351, 61392054354, 61392054356, 61392054360, 61392054365, 61392054390, 61392054391, 61392054630, 61392054631, 61392054632, 61392054639, 61392054645, 61392054651, 61392054654, 61392054656, 61392054660, 61392054690, 61392054691, 62269025624, 62269025630, 62269025654, 62269025724, 62269025924, 62269025930, 62584046701, 62584046785, 62584071501, 63304062101, 63304062110, 63304062201, 63304062210, 63304062301, 63304062310, 63739002701, 63739002703, 63739002710, 63739002715, 63739002801, 63739002803, 63739002810, 63739002815, 63874033201, 63874033202, 63874033207, 63874033210, 63874033214, 63874033215, 63874033220, 63874033230, 63874033260, 63874033290, 63874038801, 63874038807, 63874038810, 63874038812, 63874038815, 63874038820, 63874038830, 63874046801, 63874046810, 63874046814, 63874046815, 63874046820, 63874046830, 63874046860, 63874046890, 64980043701, 64980043710, 64980043801, 64980043810, 64980043901, 64980043910, 65243001403, 65862016801, 65862016899, 65862016901, 65862016999, 65862017001, 65862017099, 66116023930, 66267003130, 66336058700, 66336058730, 66336058760, 66336058790, 66336071930, 66336071960, 66336071990, 66336091430, 66336091460, 66336091490, 67046003030, 67253042010, 67253042011, 67253042110, 67253042111, 67253042210, 67253042211, 67544008730, 67544016130, 67544024030, 67544032630, 67544033260, 67544037630, 68115003830, 68115003930, 68115003960, 68115003990, 68115004015, 68115004030, 68115004060, 68115004090, 68382002201, 68382002210, 68382002301, 68382002310, 68382002401, 68382002410, 68387053830, 68387053930, 68645031054, 68645049354, 50419010510, 50419010511, 50419010610, 50419010611, 50419010710, 50419010711, 50419010910, 50419010911, 54868442300, 70515010510, 50419011506, 50419011511, 50419011606, 50419011611, 50419011906, 50419011911, 54868442301, 70515011506, 70515011606, 70515011906, 10135062301, 10135062401, 10702001301, 10702001401, 24658070001, 24658070101, 42806003801, 42806003901, 52152017902, 52152018002, 54868493200, 54868493201, 60429075301, 60429075401, 00093527056, 00093527156, 00185077101, 00185077130, 00185077401, 00185077430, 00378052301, 00378052393, 00378052401, 00378052493, 29300012601, 29300012613, 29300012701, 29300012713, 49999086600, 53489055501, 53489055507, 53489055601, 53489055607, 54868501300, 54868509500, 54868509501, 54868509502, 54868509503, 57866706801, 57866706802, 59762125801, 59762125802, 59762126101, 59762126102, 59911706001, 59911706101, 65862008601, 65862008630, 65862008701, 65862008730, 68084048721, 00006005968, 00006013628,

00006013668, 00006043768, 10019001501, 10019001571, 10019002518, 10019005561, 10019007587, 10019008501, 10019011501, 10019012601, 10019066810, 10019067010, 10019067210, 00456140201, 00456140230, 00456140263, 00456140501, 00456140530, 00456140563, 00456140590, 00456141001, 00456141030, 00456141063, 00456141090, 00456142001, 00456142030, 00456142090, 54569611900, 54569634200, 54569634201, 54868594400, 54868601800, 00074166413, 00074166513, 00093005101, 00093005105, 00093013501, 00093013505, 00093729501, 00093729505, 00093729601, 00093729605, 00228217511, 00228217611, 00228217711, 00228217811, 00378363101, 00378363102, 00378363105, 00378363107, 00378363201, 00378363202, 00378363205, 00378363207, 00378363301, 00378363302, 00378363305, 00378363307, 00378363401, 00378363402, 00378363405, 00378363407, 00781522101, 00781522201, 00781522301, 00781522401, 00904587061, 00904587161, 00904587261, 00904587361, 00904609661, 00904609761, 00904609861, 00904609961, 00904630061, 00904630161, 00904630261, 00904630361, 10135063301, 10135063305, 10135063401, 10135063405, 10135063501, 10135063505, 10135063701, 10135063705, 12280037700, 12280037730, 13107014201, 13107014205, 13107014301, 13107014305, 13107014401, 13107014405, 13107014501, 13107014505, 16590053330, 16590053360, 16590053372, 16590053390, 21695064560, 21695064660, 21695064760, 21695064860, 23490936903, 23490936906, 23490937003, 23490937006, 23490937103, 23490937106, 23490937203, 23490937206, 35356051230, 35356052600, 42291019610, 42291019710, 42291019790, 42291019810, 42291019910, 42291019990, 42291020150, 42291020160, 42291020190, 42291020218, 42291020250, 42291020260, 42291020290, 42291020330, 42291020350, 42291020360, 42291020390, 42291020418, 42291020430, 42291020450, 42291020460, 42291020490, 42291022150, 42291022190, 42291022218, 42291022250, 42291022290, 42291022350, 42291022390, 42291022450, 42291022490, 43063012593, 43063012693, 43063012793, 43063012930, 43063012960, 43063012993, 43063083360, 43353011930, 43353012260, 43353013360, 43353044030, 43353047830, 43353048553, 43353048630, 43547025410, 43547025450, 43547025510, 43547025550, 43547025610, 43547025650, 43547025710, 43547025750, 51079077119, 51079077120, 51079093019, 51079093020, 51079093119, 51079093120, 51079093220, 51407003901, 51407003905, 51407004001, 51407004005, 51407004101, 51407004105, 51407004201, 51407004205, 52343002601, 52343002605, 52343002701, 52343002705, 52343002801, 52343002805, 52343002901, 52343002905, 54569597400, 54569597401, 54569597500, 54569597501, 54569597502, 54569597600, 54569597601, 54569597602, 54569597700, 54569597701, 54569597702, 54868198000, 54868198001, 54868306200, 54868306201, 54868306202, 54868577300, 54868577301, 54868577302, 54868577303, 54868581700, 54868581701, 55111025201, 55111025205, 55111025301, 55111025305, 55111025401, 55111025405, 55111025501, 55111025505, 55887004860, 55887004930, 55887004960, 57664024213, 57664024218, 57664024288, 57664024413, 57664024418, 57664024488, 57664024513, 57664024518, 57664024588, 57664024713, 57664024718, 57664024788, 60505260601, 60505260608, 60505260701, 60505260708, 60505260801, 60505260808, 60505260901, 60505260908, 65862014201, 65862014205, 65862014301, 65862014305, 65862014401, 65862014405, 65862014501, 65862014505, 66336077230, 66336080830, 66336080860, 66336083730, 67544004330, 68001015100, 68001015103, 68001015200, 68001015203, 68001015300, 68001015303, 68001015400, 68001015403, 68084026101, 68084026201, 68084026301, 68084026401, 68084084301, 68084085401, 68084086501, 68084087601, 68382009201, 68382009205, 68382009217, 68382009301, 68382009305, 68382009317, 68382009401, 68382009405, 68382009417, 68382009501, 68382009505, 68382009517, 68462016201, 68462016205, 68462016301, 68462016305, 68462016401, 68462016405, 68462016405, 68462016501, 68462016505, 68645035059, 68645035159, 68645035259, 68645046859, 68645049659, 76385011001, 76385011050, 76385011101, 76385011150, 76385011201, 76385011250, 76385011301, 76385011350, 51407005030, 51407005130, 51407005230, 51407005330, 57664066383, 57664066483, 57664066583, 57664066683, 60505367803, 60505367903, 60505368003, 60505368103, 00007413920, 00007413955, 00007414020, 00007414055, 00007414120, 00007414155, 00007414220, 00007414255, 00247233100, 00247233130, 00247233160, 00247233177, 00247233190, 00247233200, 00247233230, 00247233260, 00247233277, 00247233290, 00247233300, 00247233330, 00247233360, 00247233377, 00247233390, 00247233400, 00247233430, 00247233460, 00247233477, 00247233490, 12280037600, 12280037630, 49999057720, 49999087230, 49999093830, 49999093930, 54569538500, 54868439500, 54868439501, 54868439502, 54868439503, 54868439600,

54868439601, 54868439602, 54868439603, 54868442100, 54868442101, 54868442102, 54868442400, 54868442401, 54868442402, 54868442403, 55289098630, 55887057560, 55887073160, 58864072730, 58864073730, 66336012560, 66336012660, 67544014330, 67544020830, 67544030530, 68115055100, 68115072700, 68115072730, 00007337013, 00007337059, 00007337113, 00007337159, 00007337213, 00007337259, 00007337313, 00007337359, 12280040330, 12280040430, 12280040530, 12280040630, 12286040530, 35356049030, 35356051830, 54868010600, 54868010601, 54868577100, 54868577101, 54868586900, 54868586901, 54868601900, 54868601901, 00003020750, 00003020753, 00003020776, 00003020850, 00003020876, 00003023250, 00003023251, 00003024150, 00003024155, 00003024176, 00003024649, 00247104430, 00247104460, 27505010001, 27505010101, 27505010201, 54569853200, 54868067400, 54868067401, 60793080001, 60793080101, 60793080201, 61570020001, 61570020056, 61570020101, 61570020110, 61570020156, 61570020201, 61570020256, 61570020301, 61570020401, 00574086201, 00641296541, 00641296545, 10019012001, 24200073550, 44567081110, 44567081210, 55150019410, 55390006210, 55390034010, 61553034265, 61553034272, 63323065210, 67457018210, 67457065725, 67457065810, 71019009004, 64370037501, 00046042181, 00046042191, 00046042195, 00046042199, 00046042281, 00046042291, 00046042295, 00046042299, 00046042480, 00046042481, 00046042491, 00046042495, 00046042499, 00046042681, 00046042691, 00046042881, 00046042891, 00046042895, 00046326510, 55289013197, 00046047081, 00046047091, 00046047181, 00046047191, 00046047199, 00046047381, 00046047391, 00046047399, 00046047981, 00046047991, 00046047999, 24090047088, 24090047188, 24090047388, 24090047988, 54569056300, 54569056400, 54569163400, 54868068000, 54868068001, 54868144100, 54868144101, 54868144200, 54868144201, 54868144202, 54868257200, 54868257201, 54868257202, 58016085900, 58016085930, 58016085960, 58016085990, 62559052001, 62559052101, 62559052201, 62559052301, 62559060030, 62559060130, 76299042085, 76299042088, 76299042285, 76299042288, 00173079001, 00173079002, 00173079101, 00173079102, 16590013230, 16590013260, 16590013330, 16590013360, 24090045085, 24090045185, 54868539500, 62559059030, 62559059130, 65726025010, 65726025025, 65726025035, 65726025090, 65726025110, 65726025125, 65726025135, 65726025190, 10631000830, 10631000930, 10631001030, 10631001130, 00024230020, 00024230110, 00025510131, 00025510134, 00025520131, 00025520134, 00074226705, 00074226711, 00074226720, 00074226734, 00074226754, 00074233905, 00074233911, 00074233934, 00143932001, 00143962201, 00143962301, 00172366660, 00172436410, 00172436460, 00172436470, 00172436510, 00172436560, 00172436570, 00172436660, 00182820289, 00182820389, 00185001001, 00185001005, 00185011701, 00185011705, 00185011801, 00185011805, 00247180100, 00247180130, 00247180160, 00247180177, 00247180190, 00247180200, 00247180230, 00247180260, 00247180277, 00247180290, 00247180300, 00247180330, 00247180360, 00247180377, 00247180390, 00409226720, 00409226725, 00409226726, 00409226754, 00409233934, 00591060501, 00591060505, 00591060601, 00591060605, 00591060701, 00677170101, 00677170105, 00677170201, 00677170205, 00677170301, 00677170305, 00904592861, 00904592961, 00904593061, 10019021002, 10019021004, 10019021084, 10135064101, 10135064201, 10135064301, 12280030315, 12280030330, 15082082250, 15082082271, 17478042020, 17478042040, 21695059260, 23629003901, 23629004101, 23629039001, 23629041001, 24200074048, 24200074049, 24979016801, 24979016802, 24979016901, 24979016902, 24979017001, 24979017002, 25021030020, 25021030040, 35356036260, 43199003701, 43199003705, 43199003801, 43199003805, 43199003901, 47781055201, 47781055301, 47781055305, 47781055401, 47781058629, 47781058656, 49452391101, 49452391102, 49452391103, 49884012201, 49884012205, 49884012301, 49884012305, 49884012401, 49884012405, 51079092820, 51079092920, 51991093498, 51991093598, 52533003416, 52544060501, 52544060505, 52544060601, 52544060605, 52544060701, 53489035401, 53489035405, 53489035501, 53489035505, 53489035601, 53489035605, 54569616900, 54569631400, 54569631500, 54868448600, 54868484400, 54868484401, 54868484402, 54868490300, 54868490301, 54868490302, 54868492100, 54868492101, 55390013020, 55390013040, 55887018001, 55887018030, 55887025930, 57866662201, 57866662301, 58016481001, 58657060501, 58657060601, 58657060701, 59772618301, 59930155303, 59930160201, 59930160202, 59930160203, 59930160204, 59930163601, 59930163602, 59930163603, 59930163604, 59930165301, 59930165302, 59930165303, 60429027701, 60429027705, 60429027801, 60429027805, 60429027901, 60505071700, 60687011401, 60687012501,

60687013601, 61553011781, 61553033633, 61553033670, 61553034172, 61703023322, 61703023341, 61703023347, 61703023348, 63739036610, 67457028020, 68001020400, 68001020403, 68001020500, 68001020503, 68001020600, 68001020603, 68084045601, 68084045701, 68382079801, 68382079805, 68382079901, 68382079905, 68382080001, 68382080005, 69374094604, 70004070006, 70092100944, 71019015902, 71019015903, 71019016401, 71019016409, 71019016410, 52533003420, 00021450015, 00091450015, 52244045010, 00028005101, 00028005110, 00028005161, 00028005165, 00028007101, 00028007110, 00028007161, 00028007165, 00028007173, 00028420133, 00078040001, 00078045805, 00078045809, 00078045905, 00078045909, 00247111914, 00247111930, 00247111952, 00247111960, 00247112030, 00247112060, 30698045801, 30698045901, 54569854300, 54569854500, 54569854501, 54868068501, 54868106300, 54868106301, 54868106302, 55289017130, 55289062730, 00185028101, 00185028110, 00185028201, 00185028210, 00185028301, 00185028310, 00185028401, 00185028410, 00186730005, 00186730105, 00186730205, 00186730305, 00378459510, 00378459577, 00378459610, 00378459677, 00378459710, 00378459777, 00378459805, 00378459877, 00527260037, 00527260043, 00527260137, 00527260143, 00527260237, 00527260243, 00527260337, 00904616961, 00904617061, 00904617161, 00904632261, 00904632361, 00904632461, 16714085201, 16714085202, 16714085203, 16714085301, 16714085302, 16714085303, 16714085401, 16714085402, 16714085403, 16714085501, 16714085502, 43063021030, 43063021090, 43063021130, 43063021190, 43063062430, 43063066330, 43063084130, 43353034830, 49884040401, 49884040410, 49884040501, 49884040510, 49884040601, 49884040610, 49884040701, 49884040710, 49884082501, 49884082510, 49884082601, 49884082610, 49884082701, 49884082710, 49884082801, 49884082810, 50268054015, 50268054115, 50268054215, 50268054315, 50742061501, 50742061505, 50742061510, 50742061601, 50742061605, 50742061610, 50742061701, 50742061705, 50742061710, 50742061801, 50742061805, 50742061810, 51079016920, 51079017020, 51079017103, 54458030031, 54458030131, 54458030231, 54569587000, 54569587001, 54569595400, 54569595401, 54569596100, 54569596101, 54868572900, 54868572901, 54868572902, 54868572903, 54868572904, 54868573000, 54868573001, 54868573002, 54868573003, 54868573100, 54868573101, 54868573102, 54868573103, 54868573200, 55045379801, 55111046601, 55111046605, 55111046701, 55111046705, 55111046801, 55111046805, 55111046901, 55111046905, 57866705301, 57866705401, 57866705601, 58177029304, 58177029309, 58177029311, 58177035804, 58177035809, 58177036804, 58177036809, 58177036811, 58177036904, 58177036909, 58177036911, 60429013901, 60429013910, 60429014001, 60429014010, 60429014101, 60429014110, 60429014201, 60429014210, 60687039001, 60687040201, 62037083001, 62037083010, 62037083101, 62037083110, 62037083201, 62037083210, 62037083301, 62037083310, 63739045310, 63739045410, 64679073402, 64679073403, 64679073408, 64679073409, 64679073502, 64679073503, 64679073508, 64679073509, 64679073602, 64679073603, 64679073608, 64679073609, 64679073702, 64679073703, 64679073708, 67544049145, 68001011900, 68001011903, 68001012000, 68001012003, 68001012100, 68001012103, 68001012200, 68001012203, 68001035600, 68001035603, 68001035700, 68001035703, 68001035800, 68001035803, 68001036000, 68001036003, 68084030101, 68084030221, 68084030301, 68084030401, 68084065901, 68084066601, 68084067301, 68382056401, 68382056410, 68382056501, 68382056510, 68382056601, 68382056610, 68382056701, 68382056705, 68645047754, 68645047854, 68645047954, 00024128906, 00024128907, 00047095424, 00047095432, 00047095524, 00074177825, 00074177835, 00074228505, 00093073301, 00093073310, 00093073401, 00093073410, 00143966010, 00143987301, 00143987310, 00143987325, 00182196601, 00182196610, 00182196701, 00182196710, 00182198701, 00182198710, 00182198801, 00182198810, 00228255410, 00228255450, 00228255496, 00228255510, 00228255550, 00228255596, 00247106500, 00247106530, 00247106560, 00247106577, 00247106590, 00247192300, 00247192360, 00364256001, 00364256002, 00364256101, 00364256102, 00364303625, 00378001801, 00378001802, 00378001805, 00378001807, 00378001891, 00378003201, 00378003202, 00378003204, 00378003210, 00378004701, 00378004702, 00378004704, 00378004710, 00378459301, 00378459305, 00378459401, 00378459405, 00405467401, 00405467403, 00405567301, 00405567303, 00409177805, 00409177835, 00409228505, 00440778530, 00517135525, 00536560401, 00536560410, 00536560501, 00536560510, 00536563801, 00536563810, 00536563901, 00536563910, 00591046201, 00591046210, 00591046301, 00591046310, 00591319578, 00603462721, 00603462732, 00603462821, 00603462832,



00615355213, 00615355243, 00615355253, 00615355263, 00615355313, 00615355353, 00615355363, 00677148201, 00677148210, 00677148301, 00677148310, 00781122301, 00781122310, 00781122313, 00781122801, 00781122810, 00781122813, 00781137101, 00781137110, 00781137113, 00781137201, 00781137210, 00781137213, 00781307075, 00781307095, 00781307195, 00839780906, 00839780916, 00839781006, 00839781016, 00839784106, 00839784116, 00839784206, 00839784216, 00904589061, 00904603360, 00904603361, 00904603380, 00904603460, 00904603461, 00904603480, 00904616261, 00904634060, 00904634061, 00904634080, 00904634160, 00904634161, 00904634180, 00904634260, 00904634261, 00904634280, 00904777260, 00904777261, 00904777280, 00904777360, 00904777361, 00904777380, 00904782060, 00904782080, 00904782160, 00904782180, 00904794660, 00904794680, 00904794760, 00904794780, 12280014500, 21695029830, 21695029900, 21695029930, 23490592000, 23490592001, 23490592101, 23490592102, 25021030305, 33358024200, 33358024230, 33358024260, 33358024290, 33358024300, 33358024330, 35356041530, 36000003310, 38245013610, 38245013620, 38245041710, 38245041720, 42543000101, 42543000110, 42543000201, 42543000210, 42543000301, 42543000310, 43063000601, 43063000690, 43063000693, 43063006406, 43063039830, 43063039890, 43063039893, 43063044090, 43063082130, 43063082160, 43063082190, 43063082193, 43063084630, 43063084690, 43063084693, 43063092790, 43063092793, 43063093890, 47781058717, 49452471801, 49452471803, 49884041210, 49884041310, 49999001000, 49999001030, 49999001060, 49999022600, 49999022630, 49999022660, 49999057510, 49999057520, 49999057530, 50742010701, 50742010705, 50742010801, 50742010810, 50742010901, 50742010910, 50752030805, 50752030809, 50752030905, 51079025519, 51079025520, 51079080119, 51079080120, 51079080124, 51079080156, 51079080157, 51079080219, 51079080220, 51655038424, 51655092825, 52343005901, 52343005999, 52343006001, 52343006099, 52343006101, 52343006199, 52544046201, 52544046210, 52544046301, 52544046310, 52555049910, 52817036000, 52817036010, 52817036100, 52817036110, 52817036200, 52817036210, 52959083930, 52959083960, 53489036601, 53489036610, 53489036701, 53489036710, 54569378700, 54569378701, 54569378702, 54569378704, 54569378705, 54569378800, 54569378801, 54569378803, 54569378804, 54569629800, 54569629801, 54569857400, 54868298900, 54868298902, 54868298903, 54868298904, 54868298905, 54868298906, 54868299000, 54868299002, 54868299003, 54868299004, 54868502100, 54868502101, 54868502102, 54868572600, 55045221700, 55045221702, 55045221706, 55045221708, 55045221709, 55045228200, 55045228202, 55045228206, 55045228207, 55045228208, 55045228209, 55045376208, 55289009330, 55289009360, 55289009390, 55289009393, 55289009397, 55289038214, 55289038230, 55289038290, 55289038293, 55289041301, 55289041328, 55289041330, 55289041360, 55289041390, 55289041393, 55289041394, 55289041397, 55289041697, 55370082007, 55370082008, 55370082107, 55370082108, 55390007310, 55390034810, 55390037310, 55887027401, 55887027430, 55887027460, 55887027490, 55887047401, 55887047430, 55887047460, 55887047490, 55887047492, 55887083220, 55887083230, 55887083260, 55953072740, 55953072770, 55953072780, 55953073440, 55953073470, 55953073480, 57237010001, 57237010099, 57237010101, 57237010199, 57237010201, 57237010299, 57480080201, 57480080206, 57480080301, 57664016608, 57664016618, 57664016652, 57664016658, 57664016708, 57664016718, 57664016752, 57664016758, 57664047708, 57664047718, 57664047752, 57664047758, 57664050608, 57664050618, 57664050652, 57664050658, 57866315501, 57866657801, 57866657901, 58016044200, 58016044202, 58016044230, 58016044260, 58016044290, 58016044299, 58016499601, 58864001601, 58864001628, 58864001630, 58864001660, 58864069530, 59762130001, 59762130003, 59762130101, 59762130103, 59762130201, 59762130203, 59772369202, 59772369205, 59772369220, 59772369302, 59772369305, 59930179501, 59930179701, 60346052306, 60429012630, 60429012660, 60429012730, 60429012760, 61392028030, 61392028031, 61392028032, 61392028039, 61392028045, 61392028051, 61392028054, 61392028056, 61392028060, 61392028090, 61392028091, 61392028630, 61392028631, 61392028632, 61392028639, 61392028645, 61392028651, 61392028654, 61392028656, 61392028660, 61392028690, 61392028691, 62332011231, 62332011291, 62332011331, 62332011431, 62332011491, 62584026501, 62584026601, 62584026701, 62584078801, 62939221101, 62939222101, 63304057901, 63304057910, 63304058001, 63304058010, 63304058101, 63304058110, 63323066005, 63629146201, 63629146202, 63629146301, 63629146302, 63629146303, 63629146304, 63739017301, 63739017303, 63739017310, 63739017315, 63739017401,

63739017403, 63739040510, 63739042810, 63874040601, 63874040610, 63874040614, 63874040615, 63874040620, 63874040628, 63874040630, 63874040660, 63874040701, 63874040710, 63874040715, 63874040720, 63874040730, 63874040760, 63874040790, 64376050301, 64376050310, 65243023203, 65243026503, 65243032903, 65862006201, 65862006299, 65862006301, 65862006359, 65862006399, 65862006401, 65862006439, 65862006499, 66105099403, 66105099406, 66105099410, 66105099411, 66105099415, 66105099603, 66105099606, 66105099610, 66105099611, 66105099615, 66116045530, 66336051430, 66336051460, 66336052330, 66336052360, 67046047530, 67046047630, 67544007630, 67544012230, 67544013030, 67544027230, 67544056730, 67544056760, 67544062760, 67544062780, 67544091160, 68115023800, 68115023830, 68115023860, 68115023890, 68115023930, 68115023960, 68115023990, 68115023997, 68645019059, 68645019159, 70860030005, 70882013260, 70882013360, 00093423501, 00093423601, 00093423701, 00172423560, 00172423570, 00172423580, 00172423660, 00172423670, 00172423680, 00172423746, 00172423760, 00172423770, 00172423780, 00172423860, 00172423870, 00172423880, 00172423960, 00172423970, 00172423980, 00182263201, 00182263205, 00182263289, 00182263301, 00182263305, 00182263310, 00182263389, 00182263401, 00182263405, 00182263410, 00364265201, 00364265202, 00364265301, 00364265302, 00364265401, 00364265402, 00378002801, 00378113201, 00378113210, 00378117101, 00378117110, 00536424501, 00536424601, 00536424701, 00603474021, 00603474121, 00603474221, 00781118101, 00781118110, 00781118192, 00781118201, 00781118210, 00781118292, 00781118301, 00781118310, 00781118392, 00781800401, 00781800501, 00781800601, 00839786906, 00839787006, 00839787106, 00904506960, 00904507060, 00904507160, 00904781660, 00904781760, 00904781860, 31722034701, 31722034801, 31722034901, 38245072410, 38245072420, 38245072710, 38245072720, 38245073110, 38779049303, 38779049304, 38779049306, 49452480601, 49452480602, 49452480603, 49999020130, 49999020230, 49999020330, 50742017801, 50742017901, 50742018001, 51079081220, 51079081320, 51079081420, 51927277600, 52189023624, 52189023629, 52189023630, 52189023724, 52189023729, 52189023730, 52189023824, 52189023829, 52189023830, 54569378900, 54569379000, 54569379100, 54569859100, 54868009650, 54868009730, 54868325701, 54868325702, 54868325703, 54868325704, 54868325705, 54868372101, 54868372102, 54868529500, 54868529501, 54868558800, 55289009650, 55887034830, 55887034920, 55887034930, 55887034990, 57866633701, 57866633801, 57866633901, 59762081001, 59762081101, 59762081201, 59772246101, 59772246102, 59772246201, 59772246202, 59772246203, 59772246301, 59772246302, 59772246303, 59772246401, 59772246403, 59772246501, 60687030225, 60687031325, 60687032425, 61392006930, 61392006931, 61392006932, 61392006939, 61392006945, 61392006951, 61392006954, 61392006960, 61392006990, 61392006991, 68001021900, 68001022000, 68001022008, 68001022100, 68001031700, 68001031800, 68001031900, 68084075521, 68084076321, 68084089725, 68382073201, 68382073301, 68382073401, 69097086707, 69097086807, 69097086907, 69238112309, 69238112409, 69238112509, 00085024404, 00085024405, 00085024407, 00085024408, 00085036206, 00085036207, 00085036208, 00085036209, 00085043803, 00085043805, 00085043806, 00085075204, 00085075205, 00085075207, 00085075208, 00247113330, 00247113360, 00247113430, 00247113460, 54569059000, 54868100401, 00172421760, 00172421770, 00172421860, 00172421870, 00182194601, 00182194701, 00228253410, 00228253510, 00364254701, 00364254801, 00378005201, 00378012701, 00405480401, 00405480501, 00536424301, 00536424401, 00603522021, 00603522121, 00615350613, 00615354713, 00677145701, 00677145801, 00781116801, 00781116901, 00839776106, 00839776112, 00839776206, 00839776212, 00904789360, 00904789460, 29033002801, 29033002901, 38779039903, 38779039904, 38779039906, 49452541701, 49452541702, 49452541703, 49502040901, 49502041001, 49884044201, 49884044301, 51285090502, 51875034001, 51875034101, 52544071001, 52544071101, 52555045401, 52555045501, 52555054501, 52555054601, 53489043001, 53489043101, 54868360200, 55953008840, 55953008870, 55953009340, 55953009370, 57480081001, 57480081006, 57480081101, 57480081106, 57664065588, 57664065688, 59772880401, 59772880410, 59772880501, 59772880510, 61392001830, 61392001831, 61392001832, 61392001839, 61392001845, 61392001851, 61392001854, 61392001856, 61392001860, 61392001890, 61392001891, 61392039530, 61392039531, 61392039532, 61392039539, 61392039545, 61392039551, 61392039554, 61392039556, 61392039560, 61392039590, 61392039591, 62559056001, 62559056101, 62559053201, 00005310223, 00005310231, 00005310923,

00005310931, 00005311023, 00005311031, 00005311123, 00005311131, 00005311223, 00005311231, 00047007024, 00047007032, 00047007124, 00047007132, 00047007224, 00047007232, 00047007324, 00047007424, 00047007430, 00054372763, 00054372844, 00054373063, 00054876416, 00054876516, 00115165901, 00115165903, 00115166001, 00115166003, 00115166101, 00115166103, 00115166201, 00115166202, 00115169301, 00143987201, 00143987210, 00182175801, 00182175810, 00182175901, 00182175910, 00182176001, 00182176010, 00182176101, 00182176201, 00182176205, 00182181289, 00182181389, 00182181489, 00182181589, 00223255001, 00223255002, 00223255101, 00223255102, 00223255201, 00223255202, 00223255301, 00223255302, 00223255401, 00223255402, 00228232110, 00228232710, 00228232750, 00228232796, 00228232910, 00228232950, 00228232996, 00228233110, 00228233150, 00228233196, 00228233310, 00228233350, 00247105004, 00247105030, 00247105052, 00247105059, 00247105060, 00247105100, 00247105130, 00247105160, 00247105199, 00247116201, 00247127300, 00247127330, 00247127379, 00247127399, 00247163430, 00339531512, 00339531712, 00339531912, 00339532012, 00339532112, 00349893610, 00349893710, 00349893810, 00349895205, 00364075601, 00364075602, 00364075690, 00364075701, 00364075702, 00364075790, 00364075801, 00364075802, 00364075890, 00364075901, 00364076001, 00364076005, 00378018201, 00378018210, 00378018301, 00378018310, 00378018401, 00378018410, 00378018501, 00378018505, 00378018701, 00405488401, 00405488403, 00405488501, 00405488503, 00405488601, 00405488603, 00405488801, 00405488802, 00536430901, 00536430905, 00536430910, 00536431301, 00536431305, 00536431310, 00536431401, 00536431405, 00536431410, 00536431501, 00536431601, 00536431605, 00591555401, 00591555410, 00591555501, 00591555510, 00591555601, 00591555610, 00591555701, 00591555705, 00603548221, 00603548232, 00603548302, 00603548321, 00603548332, 00603548421, 00603548432, 00603548521, 00603548621, 00603548628, 00603548921, 00603548932, 00603549021, 00603549032, 00603549132, 00603549221, 00603549228, 00603549321, 00603549328, 00615256113, 00615256143, 00615256153, 00615256163, 00615256213, 00615256253, 00615256263, 00615256313, 00615256353, 00615256363, 00677104101, 00677104110, 00677104201, 00677104210, 00677104301, 00677104310, 00677104401, 00677104405, 00686027720, 00686027820, 00686027920, 00686028020, 00781134401, 00781134410, 00781135401, 00781135410, 00781135413, 00781136401, 00781136410, 00781136413, 00781137401, 00781138401, 00781138405, 00781377795, 00814644528, 00814644614, 00814644630, 00814644714, 00814644730, 00814644814, 00814644830, 00839711416, 00839711516, 00839711616, 00839711706, 00839711812, 00904041160, 00904041161, 00904041180, 00904041260, 00904041261, 00904041280, 00904041460, 00904041461, 00904041480, 00904041640, 00904041660, 00904041840, 00904041860, 00904041861, 00904655061, 00904670561, 10019014501, 10019014543, 11845025701, 11845025704, 11845025804, 11845025904, 11845026103, 16714002104, 16714002106, 16714002110, 16714002112, 16714002204, 16714002206, 16714002210, 16714002212, 16714002304, 16714002306, 16714002310, 16714002312, 16714002404, 16714002410, 16714002504, 16714002505, 16714002510, 16714002511, 21695066860, 21695066930, 21695066960, 23155011001, 23155011010, 23155011101, 23155011110, 23155011201, 23155011210, 23155011301, 23155011401, 23155011405, 23490620303, 23490620306, 23490620309, 33358019230, 33358019330, 39769007502, 43063061590, 43063064730, 43063064790, 49999028660, 49999055590, 50111046701, 50111046703, 50111046707, 50111046801, 50111046803, 50111046807, 50111046901, 50111046903, 50111046907, 50111047001, 50111047002, 50111047101, 50111047102, 50268070015, 50268070115, 50268070215, 51079027719, 51079027720, 51079027820, 51079027920, 51079028020, 51655034924, 51655035024, 52544030501, 52544030510, 52544030601, 52544030610, 52544030701, 52544030710, 52544030801, 52544030805, 52544035201, 52544035205, 52555034310, 52555034410, 52555034510, 52959021201, 52959021210, 52959021220, 52959021245, 52959021250, 52959021260, 52959082730, 52959089560, 53746021701, 53746021710, 53746021779, 53746021879, 53746021979, 53746022079, 54569044200, 54569055700, 54569055701, 54569055703, 54569055900, 54569055901, 54569055903, 54569056101, 54569056102, 54569056103, 54569249900, 54643057000, 54738046801, 54738046803, 54738046901, 54738046903, 54868005200, 54868005201, 54868005202, 54868005302, 54868005303, 54868005306, 54868005307, 54868029300, 54868029301, 54868029303, 54868029304, 54868029305, 54868029306, 54868069601, 54868069602, 54868069603, 54868387300, 54868556400, 54868556401, 55045123607, 55045123608, 55045123609,

55045207801, 55045207806, 55045207808, 55045337108, 55289023301, 55289023310, 55289023312, 55289023330, 55289023360, 55289023390, 55289023397, 55289023401, 55289023430, 55289023460, 55289023490, 55390000310, 55829045110, 55829045210, 55829045310, 55829045410, 55829045510, 55887007401, 55887007430, 55887007460, 55887007490, 55887045330, 55887045360, 55887055901, 55887055930, 55887055960, 55887055990, 56126032111, 56126032211, 56126032311, 56126032411, 56126039211, 57480035501, 57480035506, 57480035601, 57480035606, 57480035701, 57480035706, 57866430901, 57866431301, 57866431401, 57866431501, 57866431601, 58016000100, 58016000130, 58016000160, 58016000190, 58016052800, 58016052815, 58016052830, 58016052860, 58016052900, 58016052910, 58016052915, 58016052920, 58016052930, 58016052950, 58016053100, 58016053115, 58016053130, 58016053200, 58016053202, 58016053215, 58016053230, 58016053260, 58864036330, 58864043160, 58864064556, 58864068030, 60429016418, 60429016490, 60429022712, 60429022718, 60429022760, 60429022790, 60687029501, 60687030601, 60809014155, 60809014172, 61392042030, 61392042031, 61392042032, 61392042034, 61392042039, 61392042045, 61392042051, 61392042054, 61392042056, 61392042060, 61392042090, 61392042091, 61392042330, 61392042331, 61392042332, 61392042334, 61392042339, 61392042345, 61392042351, 61392042354, 61392042356, 61392042360, 61392042390, 61392042391, 61392042730, 61392042731, 61392042732, 61392042739, 61392042745, 61392042751, 61392042754, 61392042756, 61392042760, 61392042790, 61392042791, 61392043030, 61392043031, 61392043032, 61392043039, 61392043045, 61392043051, 61392043054, 61392043056, 61392043060, 61392043090, 61392043091, 62584084201, 62584084285, 62584084301, 62584084385, 63323060401, 63629142301, 63629142302, 63629257001, 63629257002, 63629257003, 63874036801, 63874036802, 63874036815, 63874036820, 63874036828, 63874036830, 63874036860, 63874045401, 63874045402, 63874045404, 63874045415, 63874045420, 63874045430, 63874045460, 63874048601, 63874048602, 63874048615, 63874048630, 63874048640, 63874048660, 66860009002, 67046059060, 68115030760, 68115030860, 68115030899, 68115030930, 68115030960, 68115030990, 68115031030, 68115031060, 68115062900, 68115062930, 00093069101, 00093069201, 00093069301, 00093069401, 00182192601, 00182192701, 00182192801, 00182192901, 00228277811, 00228277850, 00228277911, 00228277950, 00228278011, 00228278050, 00228278111, 00228278150, 00245008410, 00245008411, 00245008510, 00245008511, 00245008610, 00245008611, 00245008710, 00245008711, 00247207630, 00247207660, 00258360901, 00258361001, 00258361101, 00258361201, 00339575312, 00339575512, 00339575712, 00339575912, 00349869901, 00349870001, 00349870101, 00349870701, 00364241301, 00364241401, 00364241501, 00364241601, 00378616001, 00378616005, 00378618001, 00378618005, 00378622001, 00378622005, 00378626001, 00378626005, 00405489001, 00405489101, 00405489201, 00405489301, 00536491101, 00536491201, 00536491202, 00536491301, 00536491401, 00603549721, 00603549821, 00603549921, 00603550021, 00677136301, 00677136401, 00677136501, 00677136601, 00781206101, 00781206201, 00781206301, 00781206401, 00839757206, 00839757306, 00839757406, 00839757506, 00904042160, 00904042260, 00904042360, 00904042460, 00904594761, 00904594861, 00904594961, 00904595061, 33358019430, 42291052201, 42291052210, 42291052301, 42291052310, 42291052401, 42291052410, 42291052501, 42291052510, 43478090088, 43478090188, 43478090288, 43478090388, 49884028201, 49884028210, 49884032801, 49884032810, 49884032901, 49884032910, 49884033001, 49884033010, 51991081701, 51991081705, 51991081801, 51991081805, 51991081901, 51991081905, 51991082001, 51991082005, 52959024730, 54569309700, 54868085400, 54868085401, 54868107801, 54868107803, 54868107805, 54868151700, 54868151701, 54868151702, 54868151703, 54868151800, 54868151801, 54868151802, 54868575500, 54868575501, 57866491101, 57866491201, 57866491301, 57866491401, 58016013600, 58016013630, 58016060400, 58016060430, 58016060460, 58016060490, 59911547001, 59911547002, 59911547101, 59911547102, 59911547301, 59911547302, 59911547901, 60429012601, 60429012605, 60429012701, 60429012705, 60429012801, 60429012805, 60429012901, 60429012905, 60687021501, 60687022601, 60687023725, 62559053001, 62559053101, 62559053301, 68084020901, 68084021001, 68084021101, 68084021201, 68084050301, 68084050401, 68084091625, 68084093232, 00008417701, 00008417704, 00008417901, 00247138420, 67286417701, 67286417901, 67857070001, 67857070101, 47028005401, 00245001201, 00245001211, 00245001301, 00245001311, 00245001401, 00245001411, 00245001501, 00245001511, 00093106001, 00093106101,

00093106201, 00093106301, 00115271101, 00115272201, 00115273301, 00115274401, 00185017001, 00185017009, 00185017101, 00185017105, 00185017109, 00185017401, 00185017409, 00185017701, 00185017709, 00378030501, 00378031001, 00378031401, 00603576921, 00603576928, 00603577021, 00603577025, 00603577121, 00603577221, 00677170901, 00677170905, 00677170906, 00677170907, 00677171001, 00677171005, 00677171006, 00677171101, 00677171105, 00677171106, 00677171201, 00677171205, 00677171206, 00677171207, 10135066101, 10135066201, 10135066301, 21695039730, 43063013330, 49884058201, 49884058210, 49884058301, 49884058310, 49884058401, 49884058410, 49884058501, 49884058510, 52544065401, 52544065501, 52544065601, 52544066501, 54569632400, 54569632401, 54868443500, 54868443501, 54868443502, 54868443503, 54868554900, 54868554901, 54868561400, 55045316000, 55887024230, 57866903201, 57866903202, 57866903203, 57866903204, 57866903301, 57866903302, 57866903303, 57866903304, 57866903401, 57866903402, 57866903403, 57866903404, 58016018800, 58016018802, 58016018830, 58016018860, 58016018890, 60429074801, 60429074901, 60429075001, 60429075101, 60429094801, 60429094901, 60429095001, 60429095101, 60505008000, 60505008100, 60505008200, 60505015900, 62919011210, 67457017610, 68084038701, 68084049701, 68084065401, 68115066100, 69724011210, 76385011401, 76385011501, 76385011601, 00093740106, 00093740206, 00093740306, 00378512301, 00378512401, 00378512501, 00677189301, 00677189306, 00677189401, 00677189406, 00677189501, 00677189506, 15330020801, 15330020901, 15330021001, 42291076001, 42291076101, 42291076201, 42806012101, 42806012201, 42806012301, 60505022201, 60505022301, 60505022401, 65162072510, 65162072710, 65162073110, 24338053025, 24338053048, 00310010110, 00310010139, 00310010510, 00310010534, 00310010539, 00310010710, 00310010810, 52427042990, 52427043090, 52427043190, 52959028030, 54868070100, 55289025430, 55289058730, 00364235701, 00364235801, 00364235901, 00378005501, 00378022101, 00378071501, 00405502001, 00536469601, 00603607121, 00603607221, 00781112601, 00781112701, 00781112801, 00839758406, 00839758506, 00839758606, 00839793606, 00839793706, 00904340860, 00904340960, 49452781301, 49452781302, 49452781303, 55953096140, 55953097240, 55953098440, 59591019268, 59591019468, 60951078270, 60951078370, 00186108805, 00186108835, 00186108839, 00186109005, 00186109035, 00186109039, 00186109205, 00186109235, 00186109239, 00186109405, 00186109435, 00247127400, 00247127460, 12280004900, 12280005000, 12280005015, 12280005030, 12280017200, 12280017230, 21695029130, 49999048230, 49999048300, 49999048330, 49999048400, 49999048430, 49999099600, 54569444100, 54569444200, 54569471800, 54569471801, 54868358700, 54868358701, 54868358702, 54868358703, 54868358704, 54868358705, 54868422300, 54868422301, 54868422302, 54868422303, 54868422304, 54868466100, 54868466101, 54868466102, 54868466103, 54868506800, 54868506801, 54868506802, 54868506803, 55045243101, 55045243108, 55045336101, 55045336108, 55289085530, 55289090230, 55887072930, 58016004500, 58016004530, 58016004560, 58016004590, 58016037300, 58016037302, 58016037390, 58016097400, 58016097430, 58016097460, 58016097490, 58864075930, 58864076530, 67544057382, 67801030430, 67801031530, 67801031603, 68115041900, 68115041930, 68115071500, 68115074100, 70347002502, 70347002503, 70347005002, 70347005003, 70347010002, 70347010003, 70347020002, 70347020003, 00173034643, 00173034644, 00173034647, 00173034743, 00173034744, 00173034747, 00173034843, 00173034844, 00173034847, 00173035057, 00173035058, 54868286400, 54868286401, 54868392000, 60676034847, 60976034643, 60976034644, 60976034647, 60976034743, 60976034744, 60976034747, 60976034843, 60976034844, 60976034847, 60976035057, 60976035058, 65483035502, 65483035504, 65483039110, 65483039111, 65483039150, 65483039210, 65483039222, 65483039250, 65483039310, 65483039333, 65483039350, 00078007305, 00078011105, 00005381638, 00005381738, 51285006001, 51285006101, 54868462100

**P2Y2 inhibitors**

38779095501, 38779095507, 38779095508, 58521008101, 58521008105, 70000010301, 70000010303, 00247211830, 00597000160, 21695065660, 49999091960, 54868514300, 00045049210, 00045049250, 12843010514, 00067014910, 00067014922, 00067014182, 00067014468, 00067014385, 41100007023, 41100007024, 41100007026, 41100017624, 41100017657, 63736007026, 41100007028, 41100017608, 41100017665, 63736007028, 50844067503, 50844067532, 62107002726, 62107002732, 00904671318, 00904770418, 00904770460, 00904770470, 00904770480, 11845070601, 11845070604, 11845070629,

11845089901, 11845089904, 00047060632, 00084004615, 00084005701, 00084005718, 00084007314, 00084008912, 00084040803, 00084040814, 00084040816, 00113025968, 00113027468, 00113041178, 00113041187, 00113041190, 00113041660, 00113041678, 00113041687, 00113041693, 00113042978, 00115230001, 00115230003, 00115230501, 00115230503, 00115230601, 00115230603, 00115706001, 00115706003, 00122080166, 00122082166, 00122085066, 00149009311, 00182026411, 00182026611, 00182026711, 00182044401, 00182044410, 00223033101, 00223033103, 00223033501, 00223033502, 00223503000, 00223503002, 00223503012, 00223503400, 00223503402, 00223503412, 00223503500, 00223503502, 00223503512, 00247060600, 00247060601, 00247060610, 00247060612, 00247060616, 00247060620, 00247060624, 00247060625, 00247060630, 00247060640, 00247060650, 00247060699, 00247073607, 00247073698, 00247119100, 00247119101, 00247119103, 00247119124, 00247119130, 00247119136, 00295123601, 00295123625, 00349844501, 00349844510, 00349847401, 00349847410, 00363015712, 00364002336, 00364083501, 00395013301, 00395013410, 00406200403, 00436041601, 00436041610, 00463602010, 00463602110, 00463624910, 00536100836, 00536100862, 00536105301, 00536105305, 00536105429, 00536133012, 00536134012, 00536135012, 00536329736, 00536330501, 00536330510, 00536331801, 00536332601, 00536332610, 00574000301, 00574000311, 00574000501, 00574000511, 00574000522, 00574703212, 00574703250, 00574703412, 00574703450, 00574703612, 00574703650, 00603002436, 00603003121, 00603003125, 00603806511, 00603806611, 00615052213, 00615052214, 00615052263, 00615056413, 00615350863, 00677001710, 00677077201, 00677077210, 00677077812, 00677077912, 00677085001, 00677085101, 00713010401, 00713010412, 00713010450, 00713010501, 00713010512, 00713010550, 00713010601, 00713010612, 00713010650, 00781161010, 00814090614, 00814090622, 00814090630, 00814091814, 00814091820, 00814091830, 00814091920, 00814091930, 00820013401, 00820013410, 00820014301, 00820014304, 00820014310, 00839501406, 00839501416, 00839505806, 00839505809, 00839505816, 00839505906, 00839505916, 00839553192, 00839553292, 00839676406, 00839676409, 00839676414, 00839784716, 00839784724, 00839806712, 00869151310, 00869152410, 00869153009, 00869153109, 00869153209, 00869155410, 00869155510, 00869155529, 00869155610, 00869155710, 00869155910, 00904015312, 00904015412, 00904015512, 00904200940, 00904200951, 00904200960, 00904200970, 00904200980, 00904201160, 00904201260, 00904201280, 00904201959, 00904201960, 00904201970, 00904201980, 00904404061, 00904404073, 00904628880, 00904628889, 00904681180, 05324507345, 10106003301, 10135015005, 10135015010, 10135038715, 10135038727, 10135038815, 10135038827, 10244056210, 10244056211, 10244056261, 10244056262, 10244056265, 11383005023, 11383005026, 11383007225, 11383014825, 11845089004, 11845093001, 11845097502, 11845099316, 11917004160, 11917004161, 12333904901, 12333904902, 12333904903, 12333904904, 12333905001, 12333905002, 12333950001, 16103036605, 16103036611, 17236001436, 17236037801, 17236037810, 17236037825, 17317003401, 17317003404, 17317003405, 17317003408, 17714001001, 17714001010, 17856044420, 19458500101, 19458500102, 19458500201, 19458500801, 24385041178, 24385041185, 24385041190, 24385041678, 24385041685, 24385041687, 24385041690, 24385054572, 33261029601, 36800025968, 36800027468, 36800046768, 37205010378, 37205014578, 37205014587, 37205014590, 37205041187, 37205041190, 37205041678, 37205051172, 37205058278, 37205058287, 37937004110, 37937004119, 37937004123, 37937004510, 37937004553, 37937009710, 37937028910, 43063027890, 43797034406, 45802064287, 45802070114, 45802070130, 45802070133, 45802070214, 45802070230, 45802070233, 45802070414, 45802070430, 45802070433, 45802070514, 45802070530, 45802070533, 45802070614, 45802070630, 45802070633, 47682011664, 47682080513, 49348000110, 49348000114, 49348000119, 49348000123, 49348049807, 49348075707, 49348078412, 49483000501, 49483000510, 49483001101, 49483001110, 49483033463, 49781009551, 49999035930, 49999081300, 50428152314, 51079000519, 51079000520, 51079000522, 51079000525, 51079000540, 51079000560, 51079001819, 51079001820, 51079001824, 51079048371, 51079048372, 51079054971, 51079054972, 51079055171, 51079055172, 51079065920, 51079084519, 51079084520, 51301055101, 51301055112, 51301055201, 51301055212, 51552017505, 51552017516, 51645071601, 52297013378, 52297013778, 52297013978, 52297026072, 52297026672, 52297029287, 52297041187, 52297041660, 52297041678, 52297042974, 52297042978, 52297044878, 52297050776, 52297050876, 52735070201, 52735070209, 52735076123, 52959072400, 52959072410, 52959072414, 52959072415,

52959072420, 52959072424, 52959072430, 54162094090, 54569000504, 54569000508, 54569565900, 54629080101, 54629080303, 55829015310, 55887046630, 55887069001, 55887069030, 55966002809, 55966002820, 55966004801, 55966004805, 55966004809, 55966004810, 55966004815, 55966004837, 57480010401, 57480010406, 57866109003, 57896050001, 57896050010, 57896051036, 57896090101, 57896090110, 57896090125, 58016020700, 58016201301, 58948041178, 58948041187, 58948041190, 59618009915, 59741030712, 59741030750, 59741030812, 59741030850, 60809010855, 60809010872, 60814010901, 60814010910, 60814010999, 60814017212, 61073001301, 61392003230, 61392003231, 61392003232, 61392003239, 61392003260, 61392003265, 61392003330, 61392003331, 61392003332, 61392003339, 61392003360, 61392003365, 61392003395, 62011002001, 62011002002, 63739002401, 63739002403, 63739002410, 63739002415, 63739002501, 63739002503, 63739027215, 63739043301, 63739043303, 63739043310, 63874000101, 63874000115, 63874000120, 63874000125, 63874000130, 63874000150, 66553000101, 68115043320, 68115043330, 69618001436, 70000017001, 70000025301, 70000025302, 70000025303, 70030041190, 57896098501, 57896098512, 70000020203, 70000020301, 70000021801, 49348075623, 49348098015, 49348098115, 00113046768, 00182142095, 00677197708, 00839746802, 10135024036, 11845094236, 12333944601, 17714000936, 24385002868, 24385027868, 33261004063, 37205046768, 37205070868, 49348019107, 49614046768, 50428126148, 50428299476, 52297014668, 52297046768, 52297083568, 57896091136, 58948046768, 60814017536, 62107002636, 63739043401, 63739043403, 66553000201, 68115061436, 70030046768, 70030039707, 00363021807, 00363021879, 00363025514, 10267240401, 00113027748, 00113053576, 00182044801, 00182044810, 00182044817, 00182044889, 00182044901, 00182044910, 00182106105, 00182106107, 00182821789, 00223033201, 00223033202, 00247082700, 00247082712, 00247082720, 00247082725, 00247082730, 00247215000, 00247215030, 00363022714, 00363022757, 00363041407, 00363041412, 00363041414, 00363041460, 00463602610, 00536100410, 00536100441, 00536114801, 00536114941, 00536308610, 00536308641, 00536331301, 00536331310, 00536331810, 00536332101, 00536590901, 00574000201, 00574000210, 00574000211, 00603002522, 00603002532, 00603002622, 00603002632, 00603016621, 00603016702, 00603016721, 00603016821, 00603016902, 00603016921, 00603016932, 00615056463, 00677077101, 00677077110, 00677134701, 00677185510, 00677197101, 00677197110, 00677197210, 00781160301, 00781160310, 00781161001, 00904201159, 00904201360, 00904201372, 00904201380, 00904201452, 00904201460, 00904201492, 00904521260, 00904671260, 10135012601, 10135012603, 10135012610, 10135012613, 10135012620, 10135012630, 10135012650, 10135012657, 10135012660, 10135012669, 10135012675, 10135012690, 10135017301, 10135017303, 10135017305, 10135017310, 10135017336, 10135017353, 10135017362, 10135017369, 10135017401, 10135017410, 11673002712, 12333902801, 12333902802, 12333902803, 12333902804, 15127022894, 16103035609, 16103035611, 17236038201, 17236038210, 17236070510, 17236070566, 17714001101, 17714001110, 23490660701, 23490660702, 23490661201, 23490661202, 24385042902, 24385042978, 24385042990, 24385053590, 36800027748, 37205042978, 37205042990, 37205051076, 37205051087, 37205051090, 43063086290, 43063092650, 49348003410, 49348003414, 49348003419, 49348003423, 49348003453, 49348003482, 49348028314, 49348028423, 49348075615, 49348093714, 49348093782, 49348098053, 49483000101, 49483000110, 49483000201, 49483000210, 49483002510, 49483002512, 49483003201, 49483003210, 49483005201, 49483005210, 49483022401, 49483022405, 49483022410, 49483033110, 49614011378, 49614011385, 50428140897, 50428218859, 50428230268, 50428270137, 50428271255, 50428271531, 50428299483, 50428419423, 52297091885, 52735070301, 52735070370, 52735073313, 52959001800, 52959001814, 52959001820, 52959001824, 52959001830, 52959001840, 52959001860, 52959001880, 54569001401, 54569001403, 54569423301, 54738011103, 54738055903, 55289019130, 55289019135, 55887038630, 55966004501, 55966004509, 55966008903, 55966008909, 55966010706, 55966010709, 57480010601, 57480010606, 57866109103, 57896092101, 57896092110, 57896098101, 57896098110, 58016022500, 58016022520, 58016022530, 58016022560, 58948041678, 58948042978, 58948042990, 59726044005, 59726044012, 61073001401, 61073001410, 61392009630, 61392009631, 61392009632, 61392009639, 61392009660, 62584012701, 62584012785, 62584017901, 63739002301, 63739002303, 63739027201, 63739027203, 63739027210, 63739052201, 63739052210, 63739052301, 63874099701, 63874099702, 63874099730, 65162024111, 65162024116, 65162038211, 66336032330, 66336032394,

66553000301, 68084084825, 68115003430, 68115003456, 68115003530, 68115003599, 69618001501, 69618001702, 69618001710, 69618004602, 69618004610, 10135015001, 10135015020, 10135015024, 10135015030, 10135015057, 10135015069, 57394028652, 57394028662, 00363056314, 00363056317, 00904675180, 00904678370, 00904679480, 00904679489, 49348098023, 49483038712, 49483048112, 50428458871, 00904790460, 24385053548, 24385053576, 24385053587, 58948053576, 37937004310, 52297016478, 00182106501, 00349878401, 00405410001, 00536332001, 00677117201, 00677179901, 00839726906, 00839740406, 00904058260, 00904058560, 51285080602, 52189022024, 52189022029, 55175169300, 64125010601, 00182105801, 00054057521, 00093304006, 42291011660, 43598033960, 49884000702, 60687030532, 65162059606, 70436009205, 51469030101, 00280200010, 00280200020, 00280200024, 12843010106, 12843010110, 12843010111, 12843010112, 12843010113, 12843010117, 12843010118, 12843010120, 12843010181, 12843010220, 12843010238, 12843010239, 12843019188, 12843020233, 12843020234, 12843020235, 12843033336, 12843033337, 12843006132, 12843010349, 12843061320, 12843106050, 12843052423, 12843010960, 12843053283, 12843013105, 12843013231, 00280210012, 00280210020, 00280210030, 00280210032, 00280210040, 12843010605, 12843012422, 12843050090, 00186077660, 00186077739, 00186077760, 00182190901, 00182190910, 00247073798, 00349835001, 00603008521, 37205064278, 57896053001, 57896053010, 00067206313, 00067206339, 00067206365, 01981000734, 01981000735, 19810005205, 19810005206, 19810005207, 19810007301, 55741001313, 19810005302, 00067206513, 00067206539, 01981000743, 19810071701, 19810071702, 19810071703, 00067642413, 43797040951, 58948041660, 58948041687, 58948041693, 00054002821, 00054004421, 00054004429, 00093206406, 00093206450, 00093206506, 00093723006, 00093723106, 00093723150, 00172584110, 00172584149, 00172584170, 00185012360, 00185022305, 00185022360, 00378297991, 00378298091, 00781509560, 00781509660, 50268017615, 50268017715, 51079021320, 51079042420, 51991016706, 51991016806, 52152025001, 53489058706, 53489058806, 54868541100, 55887019101, 60429076260, 60429076305, 60429076360, 60505252101, 60505252201, 62037054060, 62037054160, 64720015806, 64720015906, 66993000860, 66993000960, 68084077921, 68084077925, 70436005006, 70436005106, 00093731405, 00093731456, 00093731498, 00247227330, 00247227360, 00378362705, 00378362777, 00378362793, 00904629461, 00904646707, 13668014105, 13668014130, 13668014174, 13668014190, 16729021810, 16729021815, 16729021816, 16729021910, 16729021946, 16729021975, 31722090105, 31722090130, 31722090190, 33342006007, 33342006010, 33342006015, 42543071305, 42543071310, 42543071330, 42543071390, 43063037130, 43063037160, 43063037190, 47335089413, 47335089481, 47335089483, 49999086230, 51079055720, 51079055803, 51407003210, 51407003230, 51407003290, 54458088810, 54569632700, 54569632701, 55111019605, 55111019630, 55111019690, 55111067131, 58016001400, 58016001430, 58016001460, 58016001490, 60429011033, 60429030101, 60429030110, 60429030130, 60429030177, 60429030190, 60505025301, 60505025302, 60505025303, 60505025304, 60505353205, 60505399203, 64679031400, 64679031401, 64679031402, 64679031403, 64679031501, 64679031502, 65862035701, 65862035705, 65862035730, 65862035790, 65862035799, 68084053601, 68084053725, 68084060901, 68084075225, 68645044370, 69367019405, 69367019430, 70882011630, 71717010103, 71717010109, 71717010150, 70030041687, 00005374323, 00005374331, 00005379023, 00005379031, 00005379123, 00005379131, 00054043425, 00054043525, 00054043625, 00074204302, 00074204310, 00115107001, 00115107003, 00115107101, 00115107103, 00115107201, 00115107203, 00182135410, 00182156801, 00182156810, 00182156889, 00182156901, 00182156910, 00182156989, 00182157001, 00182157010, 00182157089, 00223083701, 00223083702, 00228218310, 00228218396, 00228218510, 00228218596, 00228219310, 00228219396, 00247106930, 00302229001, 00349234401, 00349234410, 00349234452, 00349837801, 00349837810, 00349837852, 00364249101, 00364249102, 00364249201, 00364249202, 00364249301, 00364249302, 00405435001, 00405435003, 00405435101, 00405435103, 00405435103, 00405435201, 00405435203, 00405535001, 00405535003, 00405535101, 00405535103, 00405535201, 00405535203, 00406218701, 00406218710, 00406218801, 00406218810, 00406218901, 00406218910, 00409204302, 00527146101, 00527146110, 00527146201, 00527146210, 00527146301, 00527146310, 00536357001, 00536357010, 00536361901, 00536361905, 00536361910, 00536362001, 00536362005, 00536362010, 00555025202, 00555025204, 00555025205, 00555028502, 00555028504, 00555028505, 00555028602, 00555028604, 00555028605, 00603338321,



00603338332, 00603338421, 00603338432, 00603338521, 00603338532, 00615154301, 00615154310, 00615154313, 00615157301, 00615157310, 00615157313, 00615157332, 00615157343, 00615157353, 00615157363, 00615157401, 00615157405, 00615157410, 00615157413, 00615157432, 00641113834, 00641113931, 00641256944, 00677063501, 00677063510, 00677067401, 00677067405, 00677067410, 00677068801, 00677068810, 00686006820, 00686006920, 00686007020, 00703165202, 00703165402, 00781147801, 00781147810, 00781167801, 00781167810, 00781167813, 00781189001, 00781189010, 00814260514, 00814260530, 00814260614, 00814260630, 00814260714, 00814260730, 00839632706, 00839632716, 00839642906, 00839642916, 00839649406, 00839649416, 00839791806, 00839791816, 00839791906, 00839791916, 00839792006, 00839792016, 00904108360, 00904108380, 00904108460, 00904108480, 00904108560, 00904108580, 00904108660, 00904108661, 00904108680, 00904108760, 00904108761, 00904108780, 00904108860, 00904108861, 00904108880, 10135053610, 10135053710, 10135053810, 49452264103, 49452264104, 49452264105, 50268026315, 50268026415, 50268026515, 51079006820, 51079006824, 51079006920, 51079006924, 51079007020, 51927157100, 52152026502, 52152026505, 52152026602, 52152026605, 52152026702, 52152026705, 53489011501, 53489011510, 53489011555, 53489011601, 53489011610, 53489011701, 53489011705, 53489011710, 54569046600, 54569046801, 54569047000, 54868004201, 54868004204, 54868004300, 54868004301, 54868004302, 54868004303, 54868004400, 54868004402, 55289067901, 55289074801, 55289074897, 55370015107, 55370015109, 55370015207, 55370015209, 55370015407, 55370015409, 55390055501, 55390055510, 55390055590, 55829023510, 55829023610, 55829023710, 57480032301, 57480032401, 57480032501, 60505071500, 60505071501, 61392054930, 61392054931, 61392054932, 61392054934, 61392054939, 61392054945, 61392054951, 61392054954, 61392054956, 61392054960, 61392054990, 61392054991, 61392055230, 61392055231, 61392055232, 61392055239, 61392055245, 61392055251, 61392055254, 61392055256, 61392055260, 61392055290, 61392055291, 63323061302, 63323061310, 64980013301, 64980013310, 64980013401, 64980013410, 64980013501, 64980013510, 68115066300, 68382018701, 68382018705, 68382018710, 68382018801, 68382018805, 68382018810, 68382018901, 68382018905, 68382018910, 68462011601, 68462011610, 68462011701, 68462011710, 68462011801, 68462011810, 58487000101, 00071049024, 10802975701, 10802975710, 59417097571, 67754097571, 00135001427, 00135001430, 42037010379, 49692009012, 49692090120, 49692090123, 49692090377, 49692090379, 00135011701, 00135011702, 42037010375, 42037010427, 49692090236, 49692090375, 49692090376, 49692091236, 49692090350, 49692090360, 49692090378, 49692090380, 49692090950, 62107002801, 62107002832, 00002475930, 00002475977, 00002476030, 00002476076, 00002512130, 00002512152, 00002512330, 00002512377, 54569627500, 00081021035, 00081021055, 00501621050, 00501621099, 57664018608, 59618010015, 12843016128, 01228255905, 00182141501, 00182141502, 00182203126, 00182234901, 00182141201, 05307610213, 53076010213, 53076010430, 53076010914, 53076102130, 53076104300, 55505010213, 55505010430, 55505010914, 55505104300, 10122062010, 65293000301, 65293000310, 33261001501, 33261001505, 33261001525, 59618010115, 60814011001, 60814011010, 60814011025, 60258012001, 37937075707, 49483033010, 59743001001, 01490093010, 01490093110, 01490093250, 01490108150, 04116709325, 41167009301, 41167009311, 41167009325, 41167010815, 00597001701, 00597001710, 00597001761, 00597001801, 00597001810, 00597001861, 00597001901, 00597001905, 00597001961, 11994000525, 54868128800, 00590030221, 00590030254, 11994000505, 11994000560, 11994000565, 00247187400, 00247187430, 00247187460, 00247187477, 00247187490, 49999040230, 49999040290, 52959077830, 54569470000, 54569470002, 54868407000, 54868407001, 55289091115, 55289091130, 63653117101, 63653117103, 63653117104, 63653117105, 63653117106, 63653117110, 63653117130, 63653133202, 63653133203, 63874056410, 63874056430, 63874056490, 68115085590, 54868442700, 54868502700, 59148000216, 59148000235, 59148000316, 59148000335, 00378518593, 00378518693, 16729027210, 16729027310, 60505464203, 60505464303, 65162000103, 65162000203, 65862082930, 65862083030, 66993057530, 66993057630, 67877060430, 67877060530, 00003516811, 00003516911, 00003517311, 00003517411, 00003518311, 00003518411, 54807009001, 55053051401, 41100000240, 41100000375, 50580017308, 50580017336, 50580012610, 50580012618, 50580012636, 69536018136, 11530000202, 11530000206, 11530000224, 11530000250, 49348075653, 00004001814, 00004001822, 00004001823, 00004001881, 00033043138, 00033043153, 54569469100,

54569469101, 54868378300, 54868378301, 00093015401, 00093015405, 00185011505, 00185011530, 00185011560, 00228261303, 00228261306, 00228261311, 00247127530, 00247127560, 00781151405, 00781151431, 00781151460, 00904537840, 00904537846, 00904537852, 00904537861, 42291080301, 49884059901, 49884059902, 49884059905, 49884059911, 51079092019, 51079092020, 57664032706, 57664032713, 57664032783, 57664032786, 60429076405, 60429076430, 60429076460, 60505002702, 60505002704, 60505002707, 00084019514, 00113064274, 00113064278, 00113064282, 00122086266, 00363018330, 00536331101, 00839760106, 00839760116, 00904201559, 00904201560, 24385064278, 33261002401, 49348000610, 49348000622, 49348000645, 52735072401, 55966004109, 55966004124, 58948064274, 58948064278, 60814011101, 60814011110, 60814011199, 70030064278, 00677085601, 00677086701, 00839676006, 00839676012, 52959077030, 61442050112, 70347008130, 70347008190, 70347032530, 70347032590, 60258005201, 00044005701, 00048005701, 49884005701, 49884065701, 11673056332

**Statins**

62022077030, 62022078030, 62022078130, 54868535800, 54868551300, 59630062830, 59630062930, 59630063030, 62022062730, 62022062830, 62022062930, 62022063030, 70515062830, 70515062930, 70515063030, 00093505698, 00093505798, 00093505898, 00093505998, 00378201505, 00378201577, 00378201705, 00378201777, 00378212105, 00378212177, 00378212205, 00378212277, 00378221177, 00378395005, 00378395007, 00378395009, 00378395077, 00378395105, 00378395107, 00378395109, 00378395177, 00378395205, 00378395207, 00378395209, 00378395277, 00378395305, 00378395307, 00378395309, 00378395377, 00591377410, 00591377419, 00591377510, 00591377519, 00591377605, 00591377619, 00591377705, 00591377719, 00781538192, 00781538292, 00781538492, 00781538892, 00904629061, 00904629161, 00904629261, 00904629304, 10135064910, 10135065005, 10135065110, 10135065305, 16729004417, 16729004517, 16729004617, 16729004716, 42291014310, 42291014390, 42291014410, 42291014490, 42291014550, 42291014590, 42291014650, 42291014690, 43063037330, 43063045330, 43063049660, 50268009315, 50268009415, 50268009515, 50268009612, 51079020820, 51079020920, 51079021020, 51079021103, 51079040920, 51079041020, 51079041120, 51079041203, 51407007810, 51407007890, 51407007905, 51407007990, 51407008010, 51407008090, 51407008105, 51407008190, 54458088110, 54569628200, 54569628201, 54569628300, 54569628301, 54569628400, 54569628401, 54569628500, 54569628501, 55111012105, 55111012190, 55111012205, 55111012290, 55111012305, 55111012390, 55111012405, 55111012490, 59762015501, 59762015502, 59762015601, 59762015602, 59762015701, 59762015702, 59762015801, 59762015802, 60429032310, 60429032377, 60429032390, 60429032410, 60429032477, 60429032490, 60429032505, 60429032577, 60429032590, 60429032605, 60429032633, 60429032690, 60505257808, 60505257809, 60505257908, 60505257909, 60505258008, 60505258009, 60505267100, 60505267108, 60505267109, 62175089043, 62175089046, 62175089143, 62175089146, 62175089241, 62175089246, 62175089741, 62175089746, 63304082705, 63304082790, 63304082805, 63304082890, 63304082905, 63304082990, 63304083005, 63304083090, 68064059025, 68084009701, 68084009801, 68084009901, 68084056401, 68084056501, 68084058901, 68084059025, 68382024910, 68382024916, 68382025010, 68382025016, 68382025110, 68382025116, 68382025210, 68382025216, 68645040270, 68645040370, 68645041754, 68645041854, 68645045854, 68645045870, 68645045954, 68645045970, 68645046054, 68645046154, 68645048054, 68645048070, 68645048154, 68645048170, 68645048254, 68645048354, 68645049554, 68645056854, 69097089705, 69097089715, 69097089805, 69097089812, 69097089905, 69097089915, 69097091105, 69097091112, 69097094405, 69097094415, 69097094505, 69097094512, 69097094605, 69097094615, 69097094705, 69097094712, 70377002711, 70377002811, 70377002911, 70377003012, 70882010230, 70882010630, 70882010930, 70882011930, 00026288351, 00026288386, 00026288451, 00026288486, 00026288551, 00026288569, 00026288586, 00026288669, 00026288686, 54569458900, 54569486100, 15035140000, 15035140010, 00310075139, 00310075190, 00310075239, 00310075290, 00310075295, 00310075430, 00310075590, 12280016415, 12280016490, 12280035130, 12280035190, 35356041330, 43353003115, 43353003145, 43353003160, 49999087330, 49999087390, 49999099230, 49999099290, 54569560000, 54569560001, 54569567200, 54569567202, 54569574600, 54569605401, 54868189000, 54868189001, 54868496300, 54868496301, 54868496302, 54868496303, 54868508500, 54868508501, 54868508502,

54868534100, 55289093230, 55289093530, 58016003700, 58016003730, 58016003760, 58016003790, 58016005200, 58016005230, 58016005260, 58016005290, 58016007100, 58016007130, 58016007160, 58016007190, 29273040104, 29273040204, 00093744201, 00093744256, 00093744301, 00093744356, 00093744601, 00093744656, 00378512101, 00378512193, 00378802077, 00378802093, 00378802177, 00378802193, 00781537001, 00781537031, 00781801701, 00781801731, 00078017605, 00078017615, 00078023405, 00078023415, 00078023445, 00247153630, 13411011101, 13411011102, 13411011103, 13411011106, 13411011110, 54569382100, 54569382101, 54569476100, 54868332900, 54868422400, 54868422401, 55289047630, 55289074060, 66105014701, 66105014703, 66105014706, 66105014709, 66105014710, 00078035405, 00078035415, 54569549800, 54868460100, 00071015523, 00071015534, 00071015540, 00071015623, 00071015640, 00071015694, 00071015723, 00071015740, 00071015773, 00071015788, 00071015823, 00071015873, 00071015888, 00071015892, 00247168920, 00247168930, 00247169000, 00247169010, 00247169030, 00247169090, 00247169130, 12280015030, 13411011301, 13411011303, 13411011306, 13411011309, 13411011315, 13411011401, 13411011403, 13411011406, 13411011409, 13411011415, 13411011501, 13411011503, 13411011506, 13411011509, 13411011515, 33358021001, 33358021030, 33358021060, 33358021090, 33358021091, 49999039230, 49999039290, 49999046730, 49999046790, 49999046830, 49999046890, 49999088230, 49999088290, 51655022624, 52959004630, 52959075990, 52959076090, 54569446600, 54569446601, 54569446700, 54569446701, 54569458700, 54569458701, 54569538200, 54868393400, 54868393401, 54868393402, 54868394600, 54868394601, 54868394602, 54868394603, 54868422900, 54868422901, 54868422902, 54868422903, 54868493400, 54868493401, 55289080030, 55289086130, 55289087030, 55887062430, 55887062490, 55887073030, 55887073060, 55887073090, 55887092930, 55887092990, 57866861501, 58016005100, 58016005130, 58016005160, 58016005190, 58864060830, 58864062315, 58864062330, 58864068530, 58864083430, 63629144601, 63629144602, 63629144701, 63874031990, 63874058901, 63874058990, 66105011309, 66105011409, 66105011509, 67544006015, 67801030103, 67801031403, 67801040230, 68115049430, 68115049460, 68115066815, 68115066830, 68115066890, 68115080090, 68115083630, 68115083690, 68258600009, 68258600109, 68258600209, 00002477090, 00002477190, 00002477290, 66869010490, 66869020490, 66869040490, 00093057606, 00093057610, 00093057693, 00093092606, 00093092610, 00093092693, 00093092806, 00093092810, 00093092893, 00185007001, 00185007005, 00185007010, 00185007060, 00185007201, 00185007210, 00185007260, 00185007401, 00185007410, 00185007460, 00228263306, 00228263350, 00228263406, 00228263450, 00228263506, 00228263550, 00247205330, 00247205360, 00247205430, 00247205433, 00247205459, 00247205460, 00247205530, 00247205560, 00378651091, 00378652005, 00378652091, 00378654005, 00378654091, 00781121010, 00781121060, 00781121310, 00781121360, 00781132305, 00781132360, 00904558152, 00904558252, 00904558352, 12280010860, 21695053430, 21695053530, 23490583802, 23490583806, 23490583809, 23490583900, 23490583901, 23490584001, 23490584002, 33358022330, 33358022500, 33358022530, 33358022560, 33358022630, 42291037690, 42291037710, 42291037790, 43063054814, 43063054830, 43063054890, 43063069290, 43063069293, 43063073190, 43063093930, 45963063301, 45963063304, 45963063401, 45963063404, 45963063501, 45963063504, 49884075401, 49884075402, 49884075410, 49884075501, 49884075502, 49884075510, 49884075601, 49884075602, 49884075610, 49999029330, 49999047060, 49999047100, 49999047130, 49999047160, 50268051015, 50268051115, 50268051215, 51079097420, 51079097520, 51079097556, 51079097620, 51079097656, 52959072030, 53489060701, 53489060706, 53489060801, 53489060806, 53489060810, 53489060901, 53489060906, 53489060910, 54458084516, 54458091410, 54458091510, 54458093610, 54458093710, 54458093810, 54458098210, 54458098310, 54458098410, 54569534500, 54569534501, 54569534600, 54569534602, 54569534700, 54569534702, 54868458500, 54868458501, 54868458502, 54868458503, 54868459300, 54868459301, 54868459302, 54868477400, 54868477401, 54868477402, 54868477403, 55045301401, 55045301402, 55045301406, 55045301408, 55045301409, 55045301501, 55045301508, 55289069214, 55289069230, 55289088130, 55289088190, 55887035001, 55887035030, 55887035060, 55887035090, 55887036930, 55887036960, 55887036990, 55887097430, 55887097490, 57866640001, 57866650001, 57866660101, 58016090000, 58016090002, 58016090030, 58016090060, 58016090090, 58016092200, 58016092202, 58016092230, 58016092260, 58016092290, 58016097900, 58016097902, 58016097920, 58016097930,

58016097960, 58016097990, 58864078030, 58864078060, 58864078130, 60429024810, 60429024860, 60429024910, 60429024960, 60429025010, 60429025060, 60429025090, 60429040010, 60429040060, 60429040090, 60429040110, 60429040160, 60429040190, 60429040210, 60429040260, 60429040290, 60505017700, 60505017800, 60505017900, 61442014101, 61442014110, 61442014160, 61442014201, 61442014210, 61442014260, 61442014301, 61442014310, 61442014360, 62037079101, 62037079160, 62037079201, 62037079260, 62037079301, 62037079360, 63629146401, 63629146402, 63629146403, 63629178401, 63739028010, 63739028015, 63739028101, 63739028103, 63739028110, 63739028115, 63739028201, 63739028203, 63739028210, 63874036301, 63874036310, 63874036320, 63874036330, 63874036360, 63874036390, 66336031030, 66336031060, 66336041205, 66336041230, 67544010615, 67544022515, 68001021300, 68001021306, 68001021308, 68001021400, 68001021406, 68001021408, 68001022400, 68001022406, 68001022408, 68001031400, 68001031500, 68001031508, 68001031600, 68001031608, 68084013101, 68084013201, 68084013301, 68084055801, 68084055901, 68084056001, 68115021830, 68115021930, 68115021960, 68115065800, 68180046701, 68180046703, 68180046707, 68180046801, 68180046803, 68180046805, 68180046807, 68180046901, 68180046903, 68180046905, 68180046907, 68645057690, 00006073061, 00006073128, 00006073137, 00006073161, 00006073178, 00006073182, 00006073187, 00006073194, 00006073198, 00006073261, 00006073282, 00006073287, 00006073294, 00247112930, 00247112960, 00247113030, 00247113060, 00247113060, 54569061300, 54569061301, 54569061302, 54569061303, 54569061304, 54569325600, 54569325601, 54569458400, 54569801100, 54868068601, 54868068602, 54868068603, 54868068604, 54868108700, 54868108701, 54868196800, 55175504606, 55289040030, 55289054830, 00003015450, 00003015451, 00003017850, 00003017851, 00003019450, 00003515405, 00003515406, 00003517805, 00003517806, 00003517875, 00003519410, 00003519433, 00003519510, 00003519533, 00247113814, 00247113830, 00247113860, 00247113914, 00247113930, 00247113960, 00247114014, 00247114030, 00247114060, 12280003890, 13411011801, 13411011802, 13411011803, 13411011806, 13411011809, 13411011901, 13411011902, 13411011903, 13411011906, 13411011909, 54569371500, 54569371501, 54569371502, 54569371503, 54569384000, 54569407100, 54569434600, 54569434601, 54569461000, 54569851000, 54569851001, 54569859800, 54868228701, 54868228702, 54868228800, 54868228801, 54868228802, 54868327000, 54868327001, 54868327002, 54868463400, 55289010430, 55289087130, 55289087330, 58016042500, 58016042530, 58016042560, 58016042590, 58864065330, 58864074315, 58864074330, 63629160601, 66105012001, 66105012003, 66105012006, 66105012009, 66105012015, 66105012101, 66105012103, 66105012106, 66105012109, 66105012115, 66105012201, 66105012203, 66105012206, 66105012209, 66105012215, 66105515405, 68115066490, 00093077110, 00093077198, 00093720110, 00093720198, 00093720210, 00093720298, 00093727010, 00093727098, 00378055277, 00378055377, 00378055477, 00378055777, 00378821010, 00378821077, 00378822010, 00378822077, 00378824010, 00378824077, 00378828005, 00378828077, 00591001310, 00591001319, 00591001410, 00591001419, 00591001610, 00591001619, 00591001905, 00591001919, 00781523110, 00781523192, 00781523210, 00781523292, 00781523410, 00781523492, 00781523510, 00781523592, 00904589161, 00904589261, 00904589361, 00904611361, 00904611461, 00904611561, 10135049890, 10135049990, 10135050090, 12280033515, 12280033530, 12280033590, 16252052690, 16252052750, 16252052790, 16252052850, 16252052890, 16252052950, 16252052990, 16729000815, 16729000816, 16729000915, 16729000916, 16729000917, 16729001015, 16729001016, 16729001017, 16729001115, 16729001116, 21695017830, 21695017930, 21695017990, 21695018030, 23490935003, 23490935006, 23490935009, 23490935103, 23490935106, 23490935109, 23490935203, 23490935206, 23490935209, 35356012530, 42291066510, 42291066590, 42291066710, 42291066790, 42291066810, 42291066890, 42291066910, 42291066945, 42291066990, 43063014330, 43063044330, 43063044430, 43063080730, 43063080830, 49884017609, 49884017610, 49884017909, 49884017910, 49884018009, 49884018010, 50111076117, 50111076203, 50111076217, 50111076403, 50111076417, 50268067215, 50268067315, 51079045820, 51079078220, 54458090802, 54458092510, 54458092610, 54458092710, 54458098510, 54458098610, 54458098709, 54569579300, 54569579301, 54569579400, 54569579401, 54868557600, 54868557700, 54868557701, 54868557800, 54868557801, 54868557900, 55111022905, 55111022990, 55111023005, 55111023090, 55111023105, 55111023190, 55111027405, 55111027490, 55887019290, 55887020330, 55887020390, 57237016405, 57237016490,

57237016505, 57237016590, 57237016605, 57237016690, 57237016705, 57237016790, 57866393201, 58016001200, 58016001230, 58016001260, 58016001290, 58016001300, 58016001330, 58016001360, 58016001390, 60429036745, 60429036790, 60429036845, 60429036890, 60429036905, 60429036945, 60429036990, 60505016805, 60505016809, 60505016907, 60505016909, 60505017007, 60505017008, 60505017009, 60505132305, 60505132309, 60687016901, 60687017801, 60687019001, 63304059590, 63304059690, 63304059790, 63304059805, 63304059890, 65862063390, 66336081330, 68084018601, 68084018701, 68084018801, 68084050001, 68084050101, 68084050201, 68084074625, 68180048502, 68180048509, 68180048602, 68180048609, 68180048702, 68180048709, 68180048802, 68180048809, 68382007005, 68382007016, 68382007105, 68382007116, 68382007205, 68382007216, 68382007305, 68382007316, 68462019505, 68462019590, 68462019605, 68462019690, 68462019705, 68462019790, 68462019805, 68462019890, 00904582660, 50428451100, 00093757098, 00093757198, 00093757298, 00093757356, 00378220177, 00378220377, 00378220477, 00378223293, 00781540092, 00781540192, 00781540292, 00781540331, 00904660261, 00904660361, 00904660461, 00904660561, 00904677861, 00904677961, 00904678061, 00904678161, 13668017905, 13668017930, 13668017990, 13668018030, 13668018090, 13668018130, 13668018190, 13668018230, 16252061530, 16252061550, 16252061590, 16252061630, 16252061650, 16252061690, 16252061730, 16252061750, 16252061790, 16252061830, 16252061850, 16252061890, 16729028415, 16729028417, 16729028515, 16729028517, 16729028615, 16729028617, 16729028710, 16729028715, 16729028717, 27808015501, 27808015601, 27808015701, 27808015801, 31722088290, 31722088390, 31722088490, 31722088530, 42291074290, 42291074390, 42291074490, 42291074590, 42292002920, 42292003020, 42292003120, 42292003220, 47335058281, 47335058381, 47335058481, 47335058583, 49884026009, 49884026109, 49884026209, 49884026311, 51407015390, 51407015490, 51407015590, 51407015630, 52343015190, 52343015290, 52343015390, 52343015430, 57237016805, 57237016890, 57237016990, 57237016999, 57237017090, 57237017099, 57237017105, 57237017130, 57237017190, 60505450209, 60505450309, 60505450409, 60505450503, 60687023401, 60687024501, 60687025601, 65862029390, 65862029490, 65862029590, 65862029630, 67877043990, 68462026190, 68462026290, 68462026390, 68462026430, 70377000612, 70377000712, 70377000812, 70377000911, 70377000912, 72205000290, 72205000299, 72205000390, 72205000399, 72205000490, 72205000499, 72205000530, 72205000590, 72205000599, 00093715256, 00093715293, 00093715298, 00093715310, 00093715331, 00093715356, 00093715393, 00093715398, 00093715410, 00093715431, 00093715456, 00093715493, 00093715498, 00093715510, 00093715531, 00093715556, 00093715593, 00093715598, 00093715610, 00093715656, 00093715693, 00093715698, 00406206503, 00406206505, 00406206510, 00406206560, 00406206590, 00406206603, 00406206605, 00406206610, 00406206660, 00406206690, 00406206703, 00406206705, 00406206710, 00406206760, 00406206790, 00406206803, 00406206805, 00406206810, 00406206860, 00406206890, 00406206903, 00406206905, 00406206910, 00406206960, 00406206990, 00781507031, 00781507092, 00781507131, 00781507192, 00781507231, 00781507292, 00781507331, 00781507392, 00781507431, 00781507492, 00904580061, 00904580161, 00904580261, 10135050805, 10135050890, 10135050905, 10135050930, 10135050990, 10135051005, 10135051030, 10135051090, 10135051105, 10135051130, 10135051190, 10135051205, 10135051230, 10135051290, 16252050530, 16252050550, 16252050590, 16252050630, 16252050650, 16252050690, 16252050730, 16252050750, 16252050790, 16252050830, 16252050850, 16252050890, 16252050930, 16252050950, 16252050990, 16714068101, 16714068102, 16714068201, 16714068202, 16714068203, 16714068301, 16714068302, 16714068303, 16714068401, 16714068402, 16714068403, 16714068501, 16714068502, 16714068503, 16729000410, 16729000415, 16729000417, 16729000510, 16729000515, 16729000517, 16729000610, 16729000615, 16729000617, 16729000710, 16729000715, 16729000717, 16729015610, 16729015615, 21695073930, 21695074130, 21695074230, 23490935303, 23490935306, 23490935309, 23490935403, 23490935406, 23490935409, 23490935503, 23490935506, 23490935509, 23490935603, 23490935606, 23490935609, 23490935703, 23490935706, 23490935709, 24658021010, 24658021030, 24658021045, 24658021090, 24658021110, 24658021130, 24658021145, 24658021190, 24658021210, 24658021230, 24658021245, 24658021290, 24658021310, 24658021330, 24658021345, 24658021390, 24658021410, 24658021430, 24658021445, 24658021490, 24658030010, 24658030030, 24658030045, 24658030090, 24658030110, 24658030115, 24658030130, 24658030145,

24658030190, 24658030210, 24658030215, 24658030230, 24658030245, 24658030290, 24658030310, 24658030315, 24658030330, 24658030345, 24658030390, 24658030410, 24658030415, 24658030430, 24658030445, 24658030490, 31722051010, 31722051090, 31722051110, 31722051190, 31722051210, 31722051290, 31722051310, 31722051390, 31722051490, 42291071215, 42291071315, 42291071415, 42291071515, 42291071615, 42571000590, 42571001005, 42571001090, 42571002010, 42571002090, 42571004010, 42571004090, 42571008005, 42571008090, 43063000801, 43063000890, 43063008030, 43063008090, 43063016230, 43063059330, 43063072630, 43063072690, 43063072790, 43063073330, 43353022815, 43353085845, 45802009301, 45802009365, 45802009375, 45802029265, 45802029275, 45802038401, 45802038465, 45802038475, 45802038493, 45802087901, 45802087965, 45802087975, 45802087993, 45802092465, 49349064602, 49999088930, 49999088960, 49999088990, 49999090090, 49999090315, 49999090330, 49999090390, 50268071215, 50268071315, 50268071415, 50268071515, 50268071615, 50742013710, 50742013810, 50742013910, 50742014010, 51079039320, 51079039820, 51079045420, 51079045520, 51079045620, 51079068620, 52343002130, 52343002190, 52343002199, 52343002230, 52343002245, 52343002290, 52343002299, 52343002330, 52343002345, 52343002390, 52343002399, 52343002430, 52343002445, 52343002490, 52343002499, 52343002530, 52343002545, 52343002590, 52343002599, 52959094430, 52959098830, 52959098930, 54458089410, 54458089910, 54458092804, 54458093210, 54458093310, 54458093410, 54569583300, 54569583301, 54569583302, 54569583303, 54569583401, 54569583402, 54569583403, 54569583404, 54569611300, 54569611301, 54569630200, 54868562700, 54868562701, 54868562800, 54868562801, 54868562900, 54868562901, 54868562902, 54868562903, 54868563000, 54868563001, 55111019705, 55111019730, 55111019790, 55111019805, 55111019830, 55111019890, 55111019905, 55111019910, 55111019930, 55111019990, 55111020005, 55111020010, 55111020030, 55111020090, 55111026805, 55111026830, 55111026890, 55111072610, 55111072630, 55111072690, 55111073510, 55111073530, 55111073590, 55111074010, 55111074030, 55111074090, 55111074910, 55111074930, 55111074990, 55111075010, 55111075030, 55111075090, 55289029314, 55289029330, 55289029390, 55289033814, 55289033830, 55289033890, 55289039530, 55289039590, 55887031830, 55887031860, 55887031890, 55887032730, 55887032760, 55887032790, 55887085830, 55887085860, 55887085890, 55887086130, 55887086160, 55887086190, 57866393601, 57866394901, 58016000600, 58016000630, 58016000660, 58016000690, 58016000700, 58016000730, 58016000760, 58016000790, 58016000800, 58016000830, 58016000860, 58016000890, 60687021001, 63304078910, 63304078930, 63304078990, 63304079010, 63304079030, 63304079090, 63304079110, 63304079130, 63304079190, 63304079210, 63304079230, 63304079290, 63304079310, 63304079330, 63304079350, 63304079390, 63629339301, 63739041910, 63739042010, 63739042110, 63739042210, 63739043510, 63739043610, 63739043710, 63739043810, 63739057010, 63739057110, 63739057210, 63739057310, 65862005030, 65862005090, 65862005099, 65862005126, 65862005130, 65862005190, 65862005199, 65862005226, 65862005230, 65862005290, 65862005299, 65862005322, 65862005330, 65862005390, 65862005399, 65862005430, 65862005439, 65862005490, 65862005499, 66336095330, 66336095430, 66336098630, 67544085515, 67544085615, 67544085715, 67544125745, 68084016101, 68084016201, 68084016301, 68084016401, 68084016501, 68084051001, 68084051101, 68084051201, 68084051301, 68084051401, 68180046403, 68180046406, 68180046409, 68180046503, 68180046506, 68180046509, 68180047801, 68180047802, 68180047803, 68180047901, 68180047902, 68180047903, 68180048001, 68180048002, 68180048003, 68180048101, 68180048102, 68180048103, 68180048206, 68180048209, 68382006505, 68382006506, 68382006510, 68382006514, 68382006516, 68382006605, 68382006606, 68382006610, 68382006614, 68382006616, 68382006624, 68382006705, 68382006706, 68382006710, 68382006714, 68382006716, 68382006724, 68382006805, 68382006806, 68382006810, 68382006814, 68382006816, 68382006840, 68382006905, 68382006906, 68382006910, 68382006914, 68382006916, 68645026154, 68645026254, 68645026354, 68645047054, 68645047154, 68645047254, 68645052754, 68645052757, 70377000112, 70377000114, 70377000115, 70377000212, 70377000214, 70377000215, 70377000312, 70377000314, 70377000315, 70377000412, 70377000414, 70377000415, 70377000512, 70377000514, 70377000515, 00006054328, 00006054331, 00006054354, 00006054361, 00006054382, 00006072628, 00006072631, 00006072654, 00006072661, 00006072682, 00006073528, 00006073531, 00006073554, 00006073561, 00006073582, 00006073587, 00006074028,

00006074031, 00006074054, 00006074061, 00006074082, 00006074087, 00006074928, 00006074931, 00006074954, 00006074961, 00006074982, 00247115202, 00247115214, 00247115230, 00247115260, 00247115330, 00247115360, 00247115430, 00247115445, 13411013201, 13411013203, 13411013206, 13411013209, 13411013215, 13411013301, 13411013303, 13411013306, 13411013309, 13411013315, 13411016101, 13411016103, 13411016106, 13411016109, 13411016115, 13411016201, 13411016203, 13411016206, 13411016209, 13411016215, 49999030630, 49999048830, 52959011230, 54569418000, 54569418001, 54569440300, 54569440400, 54569583400, 54868263900, 54868263901, 54868310400, 54868310401, 54868415700, 54868415701, 54868415702, 54868418100, 54868418101, 55045310008, 55289087430, 57866798201, 57866798301, 57866798601, 58016036400, 58016036430, 58016036460, 58016036490, 58016036500, 58016036530, 58016036560, 58016036590, 58016038500, 58016038530, 58016038560, 58016038590, 58864068230, 58864073930, 58864076030, 66105050503, 66105050601, 66105050603, 66105050606, 66105050609, 66105050610, 68115067230, 68115072030, 68115075930, 68115077730, 68115077790, 25208020009, 25208020109, 25208020209

**Supplementary Table 5. Weighted baseline characteristics of femoropopliteal artery revascularisation patients, stratified by treatment with drug-coated devices versus non-drug-coated devices.**

| Characteristic                   | Weighted            |                    | SMD**  |
|----------------------------------|---------------------|--------------------|--------|
|                                  | PTA/BMS<br>n=12,373 | DCB/DES<br>n=4,412 |        |
| Age, mean (SD)                   | 73.26 (8.75)        | 73.21 (8.94)       | 0.006  |
| Female                           | 5,494.6 (44.4)      | 1,965.9 (44.6)     | 0.003  |
| Peripheral artery disease*       |                     |                    |        |
| Critical limb ischaemia          | 6,300.3 (50.9)      | 2,324.5 (52.7)     | 0.035  |
| Intermittent claudication        | 4,423.5 (35.8)      | 1,667.1 (37.8)     | 0.016  |
| Other peripheral atherosclerosis | 744.8 (6.0)         | 245.4 (5.6)        | 0.002  |
| Prior amputation                 | 1,375.6 (11.1)      | 501.8 (11.4)       | 0.008  |
| History of myocardial infarction | 2,300.0 (18.6)      | 821.3 (18.6)       | 0.001  |
| Tobacco use                      | 7,230.7 (58.4)      | 2,559.5 (58.0)     | 0.009  |
| Diabetes                         | 7,214.9 (58.3)      | 2,611.3 (59.2)     | 0.018  |
| Hypertension                     | 11,482.0 (92.8)     | 4,098.0 (92.9)     | 0.003  |
| Cardiac arrhythmia               | 4,549.9 (36.8)      | 1,623.1 (36.8)     | <0.001 |
| Hypothyroidism                   | 1,992.9 (16.1)      | 712.6 (16.2)       | 0.001  |
| Renal failure                    | 4,181.5 (33.8)      | 1,519.0 (34.4)     | 0.013  |
| Congestive heart failure         | 3,877.5 (31.3)      | 1,403.8 (31.8)     | 0.01   |
| Pulmonary circulatory disorders  | 885.8 (7.2)         | 323.8 (7.3)        | 0.007  |
| Valve disease                    | 2,437.6 (19.7)      | 871.7 (19.8)       | 0.001  |
| Obesity                          | 1,742.1 (14.1)      | 634.2 (14.4)       | 0.008  |
| Liver disease                    | 619.6 (5.0)         | 225.1 (5.1)        | 0.004  |
| Fluid electrolyte disorder       | 2,874.4 (23.2)      | 1,056.2 (23.9)     | 0.017  |
| Rheumatoid arthritis             | 727.8 (5.9)         | 266.1 (6.0)        | 0.006  |
| Psychoses                        | 164.2 (1.3)         | 60.6 (1.4)         | 0.004  |
| Depression                       | 1,866.7 (15.1)      | 671.6 (15.2)       | 0.004  |
| Chronic pulmonary disorders      | 4,298.2 (34.7)      | 1,555.5 (35.3)     | 0.011  |
| Weight loss                      | 813.5 (6.6)         | 300.1 (6.8)        | 0.009  |



|                                  |                |                |        |
|----------------------------------|----------------|----------------|--------|
| Other neurological disorder      | 1,128.8 (9.1)  | 407.7 (9.2)    | 0.004  |
| Peptic ulcer disease             | 191.0 (1.5)    | 68.6 (1.6)     | 0.001  |
| Paralysis                        | 260.6 (2.1)    | 97.6 (2.2)     | 0.007  |
| Coagulopathy                     | 895.0 (7.2)    | 338.9 (7.7)    | 0.017  |
| Dementia                         | 863.7 (7.0)    | 317.1 (7.2)    | 0.008  |
| Drug abuse                       | 276.0 (2.2)    | 101.7 (2.3)    | 0.005  |
| Alcohol abuse                    | 371.4 (3.0)    | 135.7 (3.1)    | 0.004  |
| Anaemia                          | 1,384.3 (11.2) | 507.0 (11.5)   | 0.01   |
| Iron deficiency anaemia          | 324.4 (2.6)    | 116.6 (2.6)    | 0.001  |
| AIDS/HIV                         | 36.1 (0.3)     | 12.8 (0.3)     | <0.001 |
| Cancer                           | 985.2 (8.0)    | 350.9 (8.0)    | <0.001 |
| Outpatient procedure             | 7,787.0 (62.9) | 2,677.8 (60.7) | 0.046  |
| Adjunctive atherectomy           | 4,915.1 (39.7) | 1,732.4 (39.3) | 0.009  |
| Prior cardiovascular medications |                |                |        |
| ACE inhibitor or ARB use         | 4,779.7 (38.6) | 1,721.8 (39.0) | 0.008  |
| Anticoagulant use                | 1,503.9 (12.2) | 539.6 (12.2)   | 0.002  |
| Beta-blocker use                 | 5,313.6 (42.9) | 1,917.3 (43.5) | 0.01   |
| P2Y2 inhibitor use               | 4,014.9 (32.4) | 1,443.2 (32.7) | 0.006  |
| Statin use                       | 6,163.4 (49.8) | 2,215.5 (50.2) | 0.008  |
| Plan type                        |                |                | 0.012  |
| HMO                              | 3,348.4 (27.1) | 1,171.2 (26.5) |        |
| Other                            | 7,782.8 (62.9) | 2,793.1 (63.3) |        |
| PPO                              | 1,241.4 (10.0) | 448.0 (10.2)   |        |
| US region                        |                |                | 0.032  |
| East North Central               | 2,057.5 (16.6) | 738.5 (16.7)   |        |
| East South Central               | 578.8 (4.7)    | 210.3 (4.8)    |        |
| Mid Atlantic                     | 1,262.8 (10.2) | 453.5 (10.3)   |        |
| Mountain                         | 758.2 (6.1)    | 264.7 (6.0)    |        |
| New England                      | 440.0 (3.6)    | 161.4 (3.7)    |        |
| Pacific                          | 847.2 (6.8)    | 311.7 (7.1)    |        |
| South Atlantic                   | 3,340.7 (27.0) | 1,220.2 (27.7) |        |
| West North Central               | 1,234.3 (10.0) | 405.8 (9.2)    |        |

\* All categories of peripheral artery disease diagnosis (intermittent claudication, critical limb ischaemia, or other peripheral atherosclerosis) present in claims data for a patient during the lookback period were included. Patients were allowed to have more than one diagnosis if they received a claim for more than one peripheral artery disease condition during the lookback period.

\*\* A standardised mean difference (SMD) of  $>0.10$  was considered significant and are bolded in the Table.

ARB: angiotensin II receptor blocker; BMS: bare metal stent; DCB: drug-coated balloon; DES: drug-eluting stent; HMO: Health Maintenance Organisation; PPO: Preferred Provider Organisation; PTA: percutaneous transluminal angioplasty; SMD: standardised mean difference

**Supplementary Table 6. Repeat revascularisation rates and drug-coated device exposure.**

| First procedure                         | Subsequent procedure |                    |               |                  |
|-----------------------------------------|----------------------|--------------------|---------------|------------------|
|                                         | Drug-coated balloon  | Drug-eluting stent | Uncoated PTA* | Bare metal stent |
| <b>Drug-coated balloon</b><br>(N=3,600) | 504 (14.0%)          | 50 (1.4%)          | 420 (11.7%)   | 329 (9.1%)       |
| <b>Drug-eluting stent</b><br>(N=827)    | 60 (7.3%)            | 35 (4.2%)          | 81 (9.8%)     | 96 (11.6%)       |
| <b>Uncoated PTA</b><br>(N=5,840)        | 262 (4.5%)           | 70 (1.2%)          | 1,015 (17.4%) | 552 (9.5%)       |
| <b>Bare metal stent</b><br>(N=6,529)    | 282 (4.3%)           | 109 (1.7%)         | 701 (10.7%)   | 1,002 (15.3%)    |

PTA: percutaneous transluminal angioplasty
